# Supplementary material for: OsmiR528 Enhances Cold Stress Tolerance by Repressing Expression of Stress Response-related Transcription Factor Genes in Plant Cells
Source: PubMed Central journal article supplement — Curr Genomics. 2019 Feb;20(2):100–14. doi: 10.2174/1389202920666190129145439 (PMC6728904; doi:10.2174/1389202920666190129145439), 2019-02
Supplement: CG-20-100_SD1.pdf [file CG-20-100_SD1.pdf]

## Supplementary Material

### Domain-based Comparative Analysis of Bacterial Proteomes: Uniqueness, Interactions, and the Dark Matter

Liang Wang<sup>1,2,\*</sup>, Jianye Yang<sup>1</sup>, Yaping Xu<sup>1</sup>, Xue Piao<sup>1,3</sup> and Jichang Lv<sup>1</sup>

<sup>1</sup>Department of Bioinformatics, School of Medical Informatics, Xuzhou Medical University, Xuzhou, Jiangsu, 221000, China; <sup>2</sup>Key Laboratory of New Drug Research and Clinical Pharmacy of Jiangsu Province, Xuzhou Medical University, Xuzhou, Jiangsu, 221000, China; <sup>3</sup>School of Information and Control Engineering, China University of Mining and Technology, Xuzhou, Jiangsu, 221116, China

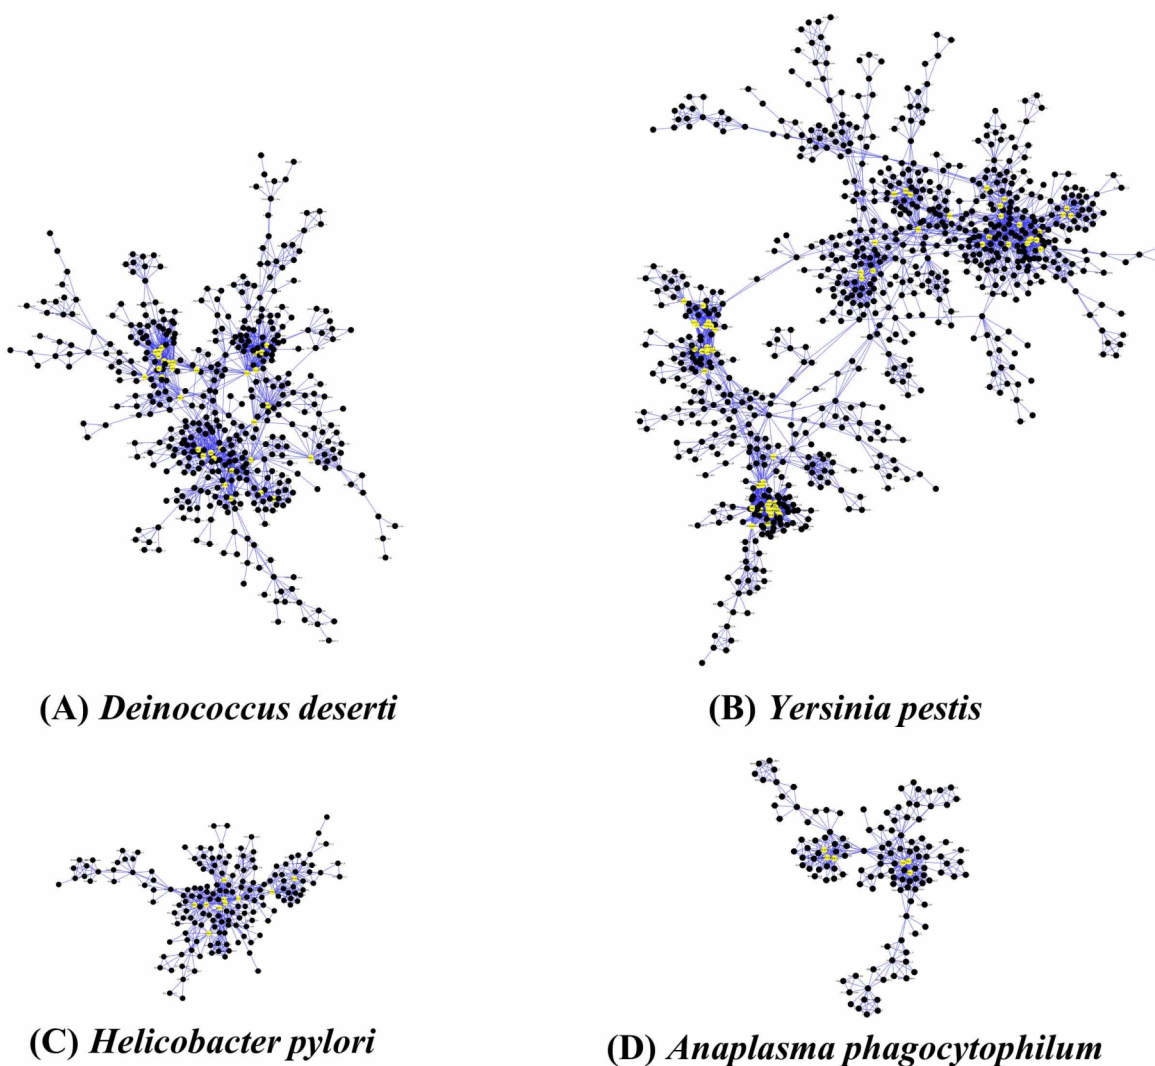

**Supplementary Figure 1** Visualization of core domain interactions in four representative bacterial species. (A) free-living bacterium *Deinococcus deserti*, (B) pathogenic bacterium *Yersinia pestis* with sit-and-wait potential, (C) host-associated and obligate-intracellular pathogen *Helicobacter pylori*, and (D) vector-borne bacterium *Anaplasma phagocytophilum*. Domains with greater than or equal to 20 direct linkages to other target domains are marked in yellow colour. A single cluster with most domains for each species was present. For the names of highly interacted domains ( $\geq 20$  co-occurrent domains) in each bacterium, please refer to **Supplementary Table 2**.

**Supplementary Table 1** Distributions of four groups of proteins in 944 bacterial proteomes. Protein groups are defined according to their domain numbers, that is, proteins with 0, 1, 2, 3 or more domains. For each bacterial proteome, the number of proteins in each group is present. In addition, the corresponding UniProt proteome identifier (Proteome ID), NCBI taxonomy identifier (Taxonomy ID), bacterial genus name, bacterial species name, and proteome size (proteins/proteome) are also listed.

| Proteome ID | Taxonomy ID | Genus                       | Species                   | Proteome Size | No. of proteins with 0 Domain | No. of proteins with 1 Domain | No of proteins with 2 Domains | No. of proteins with 3 or More Domains |
|-------------|-------------|-----------------------------|---------------------------|---------------|-------------------------------|-------------------------------|-------------------------------|----------------------------------------|
| UP000000212 | 1234679     | <i>Carnobacterium</i>       | <i>maltaromaticum</i>     | 3539          | 644                           | 1394                          | 667                           | 834                                    |
| UP000000214 | 1171373     | <i>Propionibacterium</i>    | <i>acidipropionici</i>    | 3316          | 643                           | 1274                          | 592                           | 807                                    |
| UP000000229 | 399739      | <i>Pseudomonas</i>          | <i>mendocina</i>          | 4563          | 438                           | 1924                          | 947                           | 1254                                   |
| UP000000231 | 312153      | <i>Polynucleobacter</i>     | <i>necessarius</i>        | 2074          | 203                           | 945                           | 408                           | 518                                    |
| UP000000235 | 369723      | <i>Salinispora</i>          | <i>tropica</i>            | 4522          | 824                           | 1679                          | 868                           | 1151                                   |
| UP000000238 | 349521      | <i>Hahella</i>              | <i>chejuensis</i>         | 6751          | 1817                          | 2297                          | 1134                          | 1503                                   |
| UP000000239 | 290398      | <i>Chromohalobacter</i>     | <i>salexigens</i>         | 3298          | 256                           | 1477                          | 664                           | 901                                    |
| UP000000243 | 391295      | <i>Streptococcus</i>        | <i>suis</i>               | 2178          | 360                           | 906                           | 399                           | 513                                    |
| UP000000245 | 349163      | <i>Acidiphilium</i>         | <i>cryptum</i>            | 3521          | 449                           | 1407                          | 735                           | 930                                    |
| UP000000248 | 246195      | <i>Dichelobacter</i>        | <i>nodosus</i>            | 1273          | 138                           | 551                           | 274                           | 310                                    |
| UP000000256 | 351627      | <i>Caldicellulosiruptor</i> | <i>saccharolyticus</i>    | 2629          | 366                           | 976                           | 531                           | 756                                    |
| UP000000260 | 290339      | <i>Cronobacter</i>          | <i>sakazakii</i>          | 4421          | 691                           | 1816                          | 880                           | 1034                                   |
| UP000000268 | 329726      | <i>Acaryochloris</i>        | <i>marina</i>             | 8172          | 2986                          | 2430                          | 1077                          | 1679                                   |
| UP000000269 | 350688      | <i>Alkaliphilus</i>         | <i>oremlandii</i>         | 2828          | 330                           | 1106                          | 567                           | 825                                    |
| UP000000270 | 438753      | <i>Azorhizobium</i>         | <i>caulinodans</i>        | 4708          | 497                           | 1959                          | 1014                          | 1238                                   |
| UP000000272 | 555079      | <i>Thermosediminibacter</i> | <i>oceani</i>             | 2151          | 229                           | 876                           | 396                           | 650                                    |
| UP000000276 | 681645      | <i>Corynebacterium</i>      | <i>pseudotuberculosis</i> | 2090          | 409                           | 858                           | 370                           | 453                                    |
| UP000000291 | 1051632     | <i>Sulfobacillus</i>        | <i>acidophilus</i>        | 3722          | 860                           | 1376                          | 678                           | 808                                    |
| UP000000310 | 762903      | <i>Pseudopedobacter</i>     | <i>saltans</i>            | 3780          | 662                           | 1382                          | 744                           | 992                                    |
| UP000000321 | 287752      | <i>Aurantimonas</i>         | <i>manganooxydans</i>     | 3625          | 397                           | 1524                          | 788                           | 916                                    |
| UP000000322 | 446469      | <i>Sanguibacter</i>         | <i>keddiei</i>            | 3710          | 565                           | 1459                          | 714                           | 972                                    |
| UP000000323 | 525904      | <i>Thermobaculum</i>        | <i>terrenum</i>           | 2827          | 388                           | 1036                          | 579                           | 824                                    |
| UP000000329 | 757424      | <i>Herbaspirillum</i>       | <i>seropedicae</i>        | 4732          | 552                           | 1784                          | 1055                          | 1341                                   |
| UP000000333 | 633147      | <i>Olsenella</i>            | <i>uli</i>                | 1739          | 232                           | 720                           | 362                           | 425                                    |
| UP000000343 | 1198114     | <i>Granulicella</i>         | <i>tundricola</i>         | 4514          | 1014                          | 1597                          | 828                           | 1075                                   |
| UP000000361 | 318586      | <i>Paracoccus</i>           | <i>denitrificans</i>      | 5019          | 713                           | 2146                          | 988                           | 1172                                   |
| UP000000362 | 203120      | <i>Leuconostoc</i>          | <i>mesenteroides</i>      | 2002          | 281                           | 775                           | 402                           | 544                                    |
| UP000000366 | 420662      | <i>Methylibium</i>          | <i>petroleiphilum</i>     | 4359          | 787                           | 1697                          | 857                           | 1018                                   |
| UP000000370 | 357809      | <i>Clostridium</i>          | <i>phytofermentans</i>    | 3891          | 554                           | 1446                          | 790                           | 1101                                   |
| UP000000374 | 391735      | <i>Verminephrobacter</i>    | <i>eiseniae</i>           | 4911          | 623                           | 2065                          | 1057                          | 1166                                   |
| UP000000376 | 644284      | <i>Arcanobacterium</i>      | <i>haemolyticum</i>       | 1717          | 272                           | 729                           | 303                           | 413                                    |
| UP000000377 | 749414      | <i>Streptomyces</i>         | <i>bingchenggensis</i>    | 10019         | 2000                          | 3524                          | 1870                          | 2625                                   |
| UP000000378 | 643648      | <i>Syntrophothermus</i>     | <i>lipocalidus</i>        | 2311          | 323                           | 936                           | 413                           | 639                                    |
| UP000000379 | 649638      | <i>Truepera</i>             | <i>radiovictrix</i>       | 2924          | 438                           | 1209                          | 546                           | 731                                    |
| UP000000383 | 666681      | <i>Methylotenera</i>        | <i>versatilis</i>         | 2752          | 328                           | 1150                          | 570                           | 704                                    |
| UP000000387 | 762948      | <i>Rothia</i>               | <i>dentocariosa</i>       | 2212          | 576                           | 809                           | 350                           | 477                                    |
| UP000000417 | 292459      | <i>Symbiobacterium</i>      | <i>thermophilum</i>       | 3313          | 540                           | 1239                          | 643                           | 891                                    |

|             |         |                            |                         |      |      |      |      |      |
|-------------|---------|----------------------------|-------------------------|------|------|------|------|------|
| UP000000422 | 273121  | <i>Wolinella</i>           | <i>succinogenes</i>     | 2028 | 246  | 842  | 423  | 517  |
| UP000000423 | 273119  | <i>Ureaplasma</i>          | <i>parvum</i>           | 611  | 159  | 227  | 98   | 127  |
| UP000000425 | 122586  | <i>Neisseria</i>           | <i>meningitidis</i>     | 2001 | 398  | 816  | 333  | 454  |
| UP000000429 | 85962   | <i>Helicobacter</i>        | <i>pylori</i>           | 1553 | 310  | 663  | 281  | 299  |
| UP000000430 | 62977   | <i>Acinetobacter</i>       | <i>baylyi</i>           | 3263 | 452  | 1299 | 686  | 826  |
| UP000000434 | 269800  | <i>Thermobifida</i>        | <i>fusca</i>            | 3085 | 466  | 1216 | 580  | 823  |
| UP000000439 | 206672  | <i>Bifidobacterium</i>     | <i>longum</i>           | 1725 | 239  | 693  | 350  | 443  |
| UP000000440 | 197221  | <i>Thermosynechococcus</i> | <i>elongatus</i>        | 2451 | 361  | 1000 | 439  | 651  |
| UP000000442 | 177437  | <i>Desulfobacterium</i>    | <i>autotrophicum</i>    | 4846 | 820  | 1754 | 974  | 1298 |
| UP000000444 | 396513  | <i>Staphylococcus</i>      | <i>carnosus</i>         | 2460 | 274  | 1012 | 504  | 668  |
| UP000000447 | 309801  | <i>Thermomicrobium</i>     | <i>roseum</i>           | 2858 | 666  | 965  | 527  | 700  |
| UP000000448 | 598659  | <i>Nautilia</i>            | <i>profundicola</i>     | 1730 | 254  | 712  | 337  | 427  |
| UP000000466 | 1117647 | <i>Simiduia</i>            | <i>agarivorans</i>      | 3812 | 579  | 1525 | 745  | 963  |
| UP000000467 | 1089553 | <i>Thermacetogenium</i>    | <i>phaeum</i>           | 2803 | 453  | 1150 | 519  | 681  |
| UP000000483 | 880072  | <i>Desulfobacca</i>        | <i>acetoxidans</i>      | 2859 | 519  | 1102 | 497  | 741  |
| UP000000485 | 593907  | <i>Cellulomonas</i>        | <i>gilvus</i>           | 3153 | 522  | 1259 | 582  | 790  |
| UP000000493 | 761193  | <i>Runella</i>             | <i>slithyformis</i>     | 5750 | 1295 | 2047 | 1014 | 1394 |
| UP000000495 | 765952  | <i>Parachlamydia</i>       | <i>acanthamoebae</i>    | 2784 | 991  | 882  | 392  | 519  |
| UP000000496 | 331113  | <i>Simkania</i>            | <i>negevensis</i>       | 2516 | 993  | 748  | 336  | 439  |
| UP000000503 | 744872  | <i>Treponema</i>           | <i>caldarium</i>        | 2754 | 451  | 1072 | 527  | 704  |
| UP000000504 | 903503  | <i>Moranella</i>           | <i>endobia</i>          | 405  | 0    | 191  | 100  | 114  |
| UP000000517 | 59374   | <i>Fibrobacter</i>         | <i>succinogenes</i>     | 2871 | 718  | 1053 | 482  | 618  |
| UP000000528 | 272635  | <i>Mycoplasma</i>          | <i>pulmonis</i>         | 778  | 219  | 269  | 135  | 155  |
| UP000000529 | 264201  | <i>Protochlamydia</i>      | <i>amoebophila</i>      | 2023 | 489  | 680  | 298  | 412  |
| UP000000532 | 300852  | <i>Thermus</i>             | <i>thermophilus</i>     | 2227 | 303  | 950  | 420  | 554  |
| UP000000533 | 302409  | <i>Ehrlichia</i>           | <i>ruminantium</i>      | 948  | 203  | 386  | 156  | 203  |
| UP000000537 | 312309  | <i>Vibrio</i>              | <i>fischeri</i>         | 3813 | 462  | 1540 | 879  | 932  |
| UP000000546 | 259536  | <i>Psychrobacter</i>       | <i>arcticus</i>         | 2099 | 234  | 903  | 447  | 515  |
| UP000000547 | 167879  | <i>Colwellia</i>           | <i>psychrerythraea</i>  | 4872 | 1067 | 1723 | 974  | 1108 |
| UP000000550 | 159087  | <i>Dechloromonas</i>       | <i>aromatica</i>        | 4155 | 548  | 1669 | 840  | 1098 |
| UP000000552 | 266835  | <i>Rhizobium</i>           | <i>loti</i>             | 7255 | 1247 | 2933 | 1387 | 1688 |
| UP000000555 | 273068  | <i>Caldanaerobacter</i>    | <i>subterraneus</i>     | 2545 | 323  | 984  | 477  | 761  |
| UP000000557 | 251221  | <i>Gloeobacter</i>         | <i>violaceus</i>        | 4406 | 886  | 1683 | 735  | 1102 |
| UP000000562 | 36870   | <i>Wigglesworthia</i>      | <i>glossinidia</i>      | 617  | 8    | 295  | 164  | 150  |
| UP000000566 | 435591  | <i>Parabacteroides</i>     | <i>distasonis</i>       | 3830 | 598  | 1357 | 826  | 1049 |
| UP000000577 | 243231  | <i>Geobacter</i>           | <i>sulfurreducens</i>   | 3402 | 479  | 1264 | 647  | 1012 |
| UP000000579 | 71421   | <i>Haemophilus</i>         | <i>influenzae</i>       | 1707 | 96   | 792  | 362  | 457  |
| UP000000580 | 262316  | <i>Mycobacterium</i>       | <i>paratuberculosis</i> | 4316 | 545  | 1812 | 896  | 1063 |
| UP000000581 | 257314  | <i>Lactobacillus</i>       | <i>johnsonii</i>        | 1809 | 225  | 708  | 367  | 509  |
| UP000000588 | 242619  | <i>Porphyromonas</i>       | <i>gingivalis</i>       | 1863 | 359  | 702  | 342  | 460  |
| UP000000593 | 74109   | <i>Photobacterium</i>      | <i>profundum</i>        | 5328 | 790  | 2205 | 1110 | 1223 |
| UP000000594 | 1392    | <i>Bacillus</i>            | <i>anthracis</i>        | 5493 | 1049 | 2183 | 919  | 1339 |
| UP000000602 | 177439  | <i>Desulfotalea</i>        | <i>psychrophila</i>     | 3233 | 662  | 1192 | 613  | 766  |
| UP000000605 | 272560  | <i>Burkholderia</i>        | <i>pseudomallei</i>     | 5717 | 669  | 2349 | 1204 | 1495 |

|             |        |                            |                            |      |      |      |      |      |
|-------------|--------|----------------------------|----------------------------|------|------|------|------|------|
| UP000000607 | 221988 | <i>Mannheimia</i>          | <i>succiniciproducens</i>  | 2367 | 395  | 921  | 465  | 586  |
| UP000000609 | 272624 | <i>Legionella</i>          | <i>pneumophila</i>         | 2930 | 584  | 1106 | 536  | 704  |
| UP000000625 | 83333  | <i>Escherichia</i>         | <i>coli</i>                | 4306 | 249  | 1984 | 943  | 1137 |
| UP000000628 | 471856 | <i>Jonesia</i>             | <i>denitrificans</i>       | 2495 | 443  | 964  | 453  | 635  |
| UP000000637 | 290340 | <i>Arthrobacter</i>        | <i>aureus</i>              | 4565 | 750  | 1718 | 947  | 1150 |
| UP000000639 | 357804 | <i>Psychromonas</i>        | <i>ingrahamii</i>          | 3530 | 405  | 1503 | 722  | 900  |
| UP000000643 | 360095 | <i>Bartonella</i>          | <i>bacilliformis</i>       | 1255 | 218  | 519  | 227  | 291  |
| UP000000644 | 365044 | <i>Polaromonas</i>         | <i>naphthalenivorans</i>   | 4879 | 810  | 1967 | 943  | 1159 |
| UP000000647 | 349124 | <i>Halorhodospira</i>      | <i>halophila</i>           | 2406 | 210  | 1015 | 499  | 682  |
| UP000000657 | 326424 | <i>Frankia</i>             | <i>alni</i>                | 6710 | 1852 | 2233 | 1135 | 1457 |
| UP000000671 | 234267 | <i>Solibacter</i>          | <i>usitatus</i>            | 7761 | 1603 | 2599 | 1368 | 2191 |
| UP000000684 | 318167 | <i>Shewanella</i>          | <i>frigidimarina</i>       | 3990 | 447  | 1649 | 861  | 1033 |
| UP000000718 | 289376 | <i>Thermodesulfovibrio</i> | <i>yellowstonii</i>        | 1982 | 225  | 781  | 408  | 568  |
| UP000000719 | 373903 | <i>Halothermothrix</i>     | <i>oreni</i>               | 2324 | 244  | 889  | 490  | 701  |
| UP000000723 | 511995 | <i>Azobacteroides</i>      | <i>pseudotrichonymphae</i> | 847  | 112  | 338  | 172  | 225  |
| UP000000738 | 465515 | <i>Micrococcus</i>         | <i>luteus</i>              | 2207 | 319  | 913  | 425  | 550  |
| UP000000739 | 439235 | <i>Desulfatibacillum</i>   | <i>alkenivorans</i>        | 5198 | 961  | 1729 | 973  | 1535 |
| UP000000755 | 411154 | <i>Gramella</i>            | <i>forsetii</i>            | 3554 | 782  | 1315 | 598  | 859  |
| UP000000756 | 380703 | <i>Aeromonas</i>           | <i>hydrophila</i>          | 4121 | 375  | 1701 | 907  | 1138 |
| UP000000760 | 360106 | <i>Campylobacter</i>       | <i>fetus</i>               | 1715 | 257  | 700  | 340  | 418  |
| UP000000771 | 525909 | <i>Acidimicrobium</i>      | <i>ferrooxidans</i>        | 1935 | 278  | 764  | 390  | 503  |
| UP000000773 | 278197 | <i>Pediococcus</i>         | <i>pentosaceus</i>         | 1755 | 225  | 693  | 346  | 491  |
| UP000000774 | 203123 | <i>Oenococcus</i>          | <i>oeni</i>                | 1682 | 266  | 645  | 319  | 452  |
| UP000000781 | 444179 | <i>Sulcia</i>              | <i>muelleri</i>            | 227  | 8    | 107  | 50   | 62   |
| UP000000784 | 398578 | <i>Delftia</i>             | <i>acidovorans</i>         | 5968 | 836  | 2408 | 1289 | 1435 |
| UP000000787 | 316274 | <i>Herpetosiphon</i>       | <i>aurantiacus</i>         | 5254 | 1141 | 1759 | 846  | 1508 |
| UP000000788 | 93059  | <i>Prochlorococcus</i>     | <i>marinus</i>             | 1855 | 422  | 790  | 292  | 351  |
| UP000000798 | 224324 | <i>Aquifex</i>             | <i>aeolicus</i>            | 1553 | 150  | 630  | 327  | 446  |
| UP000000809 | 272843 | <i>Pasteurella</i>         | <i>multocida</i>           | 2015 | 124  | 901  | 432  | 558  |
| UP000000812 | 160492 | <i>Xylella</i>             | <i>fastidiosa</i>          | 2772 | 943  | 938  | 397  | 494  |
| UP000000813 | 176299 | <i>Agrobacterium</i>       | <i>fabrum</i>              | 5344 | 678  | 2230 | 1069 | 1367 |
| UP000000815 | 632    | <i>Yersinia</i>            | <i>pestis</i>              | 3909 | 417  | 1735 | 803  | 945  |
| UP000000817 | 169963 | <i>Listeria</i>            | <i>monocytogenes</i>       | 2844 | 267  | 1210 | 555  | 812  |
| UP000000822 | 221109 | <i>Oceanobacillus</i>      | <i>iheyensis</i>           | 3490 | 357  | 1519 | 698  | 916  |
| UP000000841 | 471857 | <i>Saccharomonospora</i>   | <i>viridis</i>             | 3828 | 588  | 1491 | 755  | 994  |
| UP000000844 | 446470 | <i>Stackebrandtia</i>      | <i>nassauensis</i>         | 6379 | 1302 | 2259 | 1228 | 1590 |
| UP000000845 | 526218 | <i>Sebaldella</i>          | <i>termitidis</i>          | 4124 | 1083 | 1480 | 658  | 903  |
| UP000000851 | 479433 | <i>Catenulispora</i>       | <i>acidiphila</i>          | 8909 | 1863 | 3062 | 1664 | 2320 |
| UP000000852 | 485917 | <i>Pedobacter</i>          | <i>heparinus</i>           | 4249 | 727  | 1508 | 871  | 1143 |
| UP000000925 | 583355 | <i>Coralimargarita</i>     | <i>akajimensis</i>         | 3110 | 692  | 1157 | 546  | 715  |
| UP000000927 | 264731 | <i>Prevotella</i>          | <i>ruminicola</i>          | 2761 | 434  | 1061 | 551  | 715  |
| UP000000930 | 749219 | <i>Moraxella</i>           | <i>catarrhalis</i>         | 1881 | 442  | 739  | 319  | 381  |
| UP000000939 | 572480 | <i>Arcobacter</i>          | <i>nitrofigilis</i>        | 3125 | 478  | 1236 | 651  | 760  |
| UP000000948 | 634452 | <i>Acetobacter</i>         | <i>pasteurianus</i>        | 2906 | 498  | 1160 | 579  | 669  |

|             |        |                             |                              |      |      |      |      |      |
|-------------|--------|-----------------------------|------------------------------|------|------|------|------|------|
| UP000000954 | 469378 | <i>Cryptobacterium</i>      | <i>curtum</i>                | 1355 | 142  | 563  | 276  | 374  |
| UP000000960 | 521095 | <i>Atopobium</i>            | <i>parvulum</i>              | 1353 | 164  | 516  | 317  | 356  |
| UP000000998 | 351348 | <i>Marinobacter</i>         | <i>hydrocarbonoclasticus</i> | 4170 | 605  | 1634 | 833  | 1098 |
| UP000001007 | 194439 | <i>Chlorobium</i>           | <i>tepidum</i>               | 2250 | 511  | 806  | 383  | 550  |
| UP000001010 | 190485 | <i>Xanthomonas</i>          | <i>campestris</i>            | 4127 | 581  | 1683 | 822  | 1040 |
| UP000001014 | 99287  | <i>Salmonella</i>           | <i>typhimurium</i>           | 4533 | 302  | 2146 | 984  | 1101 |
| UP000001023 | 246200 | <i>Ruegeria</i>             | <i>pomeroyi</i>              | 4269 | 452  | 1847 | 918  | 1052 |
| UP000001025 | 243090 | <i>Rhodopirellula</i>       | <i>baltica</i>               | 7271 | 3282 | 1775 | 932  | 1282 |
| UP000001029 | 445932 | <i>Elusimicrobium</i>       | <i>minutum</i>               | 1528 | 300  | 590  | 280  | 358  |
| UP000001031 | 349741 | <i>Akkermansia</i>          | <i>muciniphila</i>           | 2137 | 444  | 776  | 423  | 494  |
| UP000001036 | 498211 | <i>Cellvibrio</i>           | <i>japonicus</i>             | 3711 | 643  | 1426 | 693  | 949  |
| UP000001052 | 485915 | <i>Desulfohalobium</i>      | <i>retbaense</i>             | 2500 | 345  | 945  | 489  | 721  |
| UP000001062 | 717774 | <i>Marinomonas</i>          | <i>mediterranea</i>          | 4118 | 533  | 1688 | 868  | 1029 |
| UP000001110 | 391009 | <i>Thermosipho</i>          | <i>melanesiensis</i>         | 1877 | 292  | 746  | 374  | 465  |
| UP000001114 | 339671 | <i>Actinobacillus</i>       | <i>succinogenes</i>          | 2077 | 89   | 923  | 473  | 592  |
| UP000001116 | 266940 | <i>Kineococcus</i>          | <i>radiotolerans</i>         | 4674 | 952  | 1758 | 803  | 1161 |
| UP000001171 | 283942 | <i>Idiomarina</i>           | <i>lohiensis</i>             | 2608 | 228  | 1066 | 577  | 737  |
| UP000001172 | 235909 | <i>Geobacillus</i>          | <i>kaustophilus</i>          | 3516 | 500  | 1439 | 629  | 948  |
| UP000001173 | 264203 | <i>Zymomonas</i>            | <i>mobilis</i>               | 1779 | 192  | 770  | 369  | 448  |
| UP000001174 | 177416 | <i>Francisella</i>          | <i>tularensis</i>            | 1528 | 231  | 605  | 333  | 359  |
| UP000001176 | 272568 | <i>Gluconacetobacter</i>    | <i>diazotrophicus</i>        | 3783 | 752  | 1466 | 702  | 863  |
| UP000001191 | 63737  | <i>Nostoc</i>               | <i>punctiforme</i>           | 6573 | 1525 | 2255 | 1001 | 1792 |
| UP000001205 | 314724 | <i>Borrelia</i>             | <i>turicatae</i>             | 818  | 194  | 468  | 146  | 216  |
| UP000001208 | 517418 | <i>Chloroherpeton</i>       | <i>thalassium</i>            | 2708 | 408  | 1040 | 472  | 788  |
| UP000001213 | 521096 | <i>Tsukamurella</i>         | <i>paurometabola</i>         | 4170 | 656  | 1696 | 792  | 1026 |
| UP000001219 | 526226 | <i>Gordonia</i>             | <i>bronchialis</i>           | 4628 | 850  | 1790 | 918  | 1070 |
| UP000001225 | 340100 | <i>Bordetella</i>           | <i>petrii</i>                | 4912 | 469  | 2111 | 1069 | 1263 |
| UP000001227 | 452471 | <i>Amoebophilus</i>         | <i>asiaticus</i>             | 1253 | 300  | 396  | 201  | 356  |
| UP000001235 | 395494 | <i>Gallionella</i>          | <i>capsiferriformans</i>     | 2853 | 446  | 1094 | 571  | 742  |
| UP000001299 | 515622 | <i>Butyrivibrio</i>         | <i>proteoclasticus</i>       | 3799 | 939  | 1280 | 660  | 920  |
| UP000001302 | 314260 | <i>Parvularcula</i>         | <i>bermudensis</i>           | 2687 | 431  | 1175 | 484  | 597  |
| UP000001303 | 871271 | <i>Zinderia</i>             | <i>insecticola</i>           | 206  | 10   | 117  | 35   | 44   |
| UP000001306 | 281090 | <i>Leifsonia</i>            | <i>xyli</i>                  | 2001 | 376  | 819  | 376  | 430  |
| UP000001318 | 31964  | <i>Clavibacter</i>          | <i>michiganensis</i>         | 3058 | 630  | 1172 | 512  | 744  |
| UP000001319 | 334413 | <i>Fingoldia</i>            | <i>magna</i>                 | 1813 | 278  | 713  | 320  | 502  |
| UP000001332 | 864702 | <i>Oscillatoriales</i>      | <i>cyanobacterium</i>        | 4673 | 1096 | 1733 | 699  | 1145 |
| UP000001351 | 378806 | <i>Stigmatella</i>          | <i>aurantiaca</i>            | 8307 | 2210 | 2606 | 1406 | 2085 |
| UP000001362 | 243159 | <i>Acidithiobacillus</i>    | <i>ferrooxidans</i>          | 3120 | 800  | 1152 | 498  | 670  |
| UP000001366 | 123214 | <i>Persephonella</i>        | <i>marina</i>                | 2048 | 362  | 753  | 391  | 542  |
| UP000001369 | 204536 | <i>Sulfurihydrogenibium</i> | <i>azoreense</i>             | 1708 | 226  | 665  | 367  | 450  |
| UP000001377 | 479437 | <i>Eggerthella</i>          | <i>lenta</i>                 | 3054 | 479  | 1152 | 553  | 870  |
| UP000001382 | 526225 | <i>Geodermatophilus</i>     | <i>obscurus</i>              | 4795 | 911  | 1792 | 900  | 1192 |
| UP000001383 | 458233 | <i>Macrococcus</i>          | <i>caseolyticus</i>          | 2059 | 203  | 813  | 449  | 594  |
| UP000001399 | 648757 | <i>Rhodomicrobium</i>       | <i>vanniellii</i>            | 3513 | 620  | 1401 | 624  | 868  |

|             |        |                            |                         |      |      |      |      |      |
|-------------|--------|----------------------------|-------------------------|------|------|------|------|------|
| UP000001405 | 713887 | <i>Atelocyanobacterium</i> | <i>thalassa</i>         | 1199 | 131  | 535  | 221  | 312  |
| UP000001408 | 189518 | <i>Leptospira</i>          | <i>interrogans</i>      | 3676 | 1029 | 1311 | 592  | 744  |
| UP000001414 | 226186 | <i>Bacteroides</i>         | <i>thetaiotaomicron</i> | 4782 | 765  | 1653 | 1001 | 1363 |
| UP000001415 | 226185 | <i>Enterococcus</i>        | <i>faecalis</i>         | 3240 | 633  | 1288 | 557  | 762  |
| UP000001416 | 228410 | <i>Nitrosomonas</i>        | <i>europaea</i>         | 2375 | 252  | 972  | 491  | 660  |
| UP000001424 | 243365 | <i>Chromobacterium</i>     | <i>violaceum</i>        | 4397 | 698  | 1718 | 907  | 1074 |
| UP000001436 | 267608 | <i>Ralstonia</i>           | <i>solanacearum</i>     | 5002 | 819  | 1919 | 1048 | 1216 |
| UP000001441 | 572477 | <i>Allochromatium</i>      | <i>vinosum</i>          | 3211 | 406  | 1321 | 617  | 867  |
| UP000001453 | 525284 | <i>Gardnerella</i>         | <i>vaginalis</i>        | 1365 | 253  | 544  | 251  | 317  |
| UP000001476 | 515620 | <i>Eubacterium</i>         | <i>eligens</i>          | 2761 | 586  | 988  | 521  | 666  |
| UP000001477 | 515619 | <i>Agathobacter</i>        | <i>rectalis</i>         | 3545 | 994  | 1170 | 593  | 788  |
| UP000001485 | 634503 | <i>Edwardsiella</i>        | <i>ictaluri</i>         | 3686 | 656  | 1514 | 724  | 792  |
| UP000001492 | 573065 | <i>Asticcacaulis</i>       | <i>excentricus</i>      | 3743 | 602  | 1540 | 755  | 846  |
| UP000001505 | 716544 | <i>Waddlia</i>             | <i>chondrophila</i>     | 1919 | 542  | 647  | 337  | 393  |
| UP000001508 | 589865 | <i>Desulfurivibrio</i>     | <i>alkaliphilus</i>     | 2595 | 317  | 980  | 555  | 743  |
| UP000001510 | 449447 | <i>Microcystis</i>         | <i>aeruginosa</i>       | 5981 | 2064 | 1988 | 764  | 1165 |
| UP000001520 | 639282 | <i>Deferribacter</i>       | <i>desulfuricans</i>    | 2338 | 333  | 866  | 483  | 656  |
| UP000001551 | 663278 | <i>Ethanoligenens</i>      | <i>harbinense</i>       | 2663 | 408  | 1049 | 502  | 704  |
| UP000001556 | 349161 | <i>Desulfotomaculum</i>    | <i>reducens</i>         | 3220 | 449  | 1260 | 608  | 903  |
| UP000001565 | 357244 | <i>Orientia</i>            | <i>tsutsugamushi</i>    | 966  | 207  | 390  | 151  | 218  |
| UP000001591 | 414684 | <i>Rhodospirillum</i>      | <i>centenum</i>         | 3984 | 742  | 1527 | 738  | 977  |
| UP000001601 | 398720 | <i>Leeuwenhoekella</i>     | <i>blandensis</i>       | 3687 | 720  | 1371 | 663  | 933  |
| UP000001619 | 522306 | <i>Accumulibacter</i>      | <i>phosphatis</i>       | 4438 | 683  | 1802 | 860  | 1093 |
| UP000001625 | 580332 | <i>Sideroxydans</i>        | <i>lithotrophicus</i>   | 2977 | 484  | 1200 | 556  | 737  |
| UP000001635 | 880070 | <i>Cyclobacterium</i>      | <i>marinum</i>          | 4983 | 1083 | 1761 | 967  | 1172 |
| UP000001654 | 655815 | <i>Zunongwangia</i>        | <i>profunda</i>         | 4633 | 1129 | 1541 | 821  | 1142 |
| UP000001660 | 330214 | <i>Nitrospira</i>          | <i>defluvii</i>         | 4263 | 1138 | 1423 | 692  | 1010 |
| UP000001661 | 574087 | <i>Acetohalobium</i>       | <i>arabaticum</i>       | 2276 | 209  | 939  | 436  | 692  |
| UP000001681 | 262543 | <i>Exiguobacterium</i>     | <i>sibiricum</i>        | 3005 | 430  | 1133 | 567  | 875  |
| UP000001683 | 457570 | <i>Natranaerobius</i>      | <i>thermophilus</i>     | 2847 | 409  | 1090 | 538  | 810  |
| UP000001693 | 395495 | <i>Leptothrix</i>          | <i>cholodnii</i>        | 4343 | 498  | 1788 | 939  | 1118 |
| UP000001695 | 395963 | <i>Beijerinckia</i>        | <i>indica</i>           | 3774 | 641  | 1512 | 677  | 944  |
| UP000001700 | 515618 | <i>Riesia</i>              | <i>pediculicola</i>     | 540  | 83   | 219  | 110  | 128  |
| UP000001702 | 706191 | <i>Pantoea</i>             | <i>ananatis</i>         | 4241 | 347  | 1866 | 913  | 1115 |
| UP000001726 | 338565 | <i>Erwinia</i>             | <i>tasmaniensis</i>     | 3618 | 407  | 1625 | 731  | 855  |
| UP000001732 | 309798 | <i>Coprothermobacter</i>   | <i>proteolyticus</i>    | 1481 | 251  | 572  | 285  | 373  |
| UP000001784 | 335543 | <i>Syntrophobacter</i>     | <i>fumaroxidans</i>     | 4012 | 736  | 1436 | 754  | 1086 |
| UP000001803 | 565034 | <i>Brachyspira</i>         | <i>hyodysenteriae</i>   | 2642 | 553  | 942  | 488  | 659  |
| UP000001816 | 190650 | <i>Caulobacter</i>         | <i>crescentus</i>       | 3720 | 603  | 1468 | 743  | 906  |
| UP000001822 | 269798 | <i>Cytophaga</i>           | <i>hutchinsonii</i>     | 3771 | 987  | 1359 | 589  | 836  |
| UP000001844 | 472759 | <i>Nitrosococcus</i>       | <i>halophilus</i>       | 3770 | 694  | 1499 | 668  | 909  |
| UP000001868 | 450851 | <i>Phenylobacterium</i>    | <i>zucineum</i>         | 3838 | 352  | 1634 | 802  | 1050 |
| UP000001870 | 314275 | <i>Alteromonas</i>         | <i>mediterranea</i>     | 3938 | 677  | 1527 | 792  | 939  |
| UP000001877 | 358681 | <i>Brevibacillus</i>       | <i>brevis</i>           | 5887 | 1032 | 2110 | 1117 | 1628 |

|             |        |                           |                           |      |      |      |      |      |
|-------------|--------|---------------------------|---------------------------|------|------|------|------|------|
| UP000001880 | 502025 | <i>Haliangium</i>         | <i>ochraceum</i>          | 6684 | 1780 | 2075 | 1107 | 1722 |
| UP000001887 | 530564 | <i>Pirellula</i>          | <i>staleyii</i>           | 4711 | 1329 | 1525 | 771  | 1086 |
| UP000001902 | 591001 | <i>Acidaminococcus</i>    | <i>fermentans</i>         | 2016 | 222  | 789  | 455  | 550  |
| UP000001908 | 644283 | <i>Micromonospora</i>     | <i>aurantiaca</i>         | 6204 | 1237 | 2274 | 1128 | 1565 |
| UP000001910 | 523794 | <i>Leptotrichia</i>       | <i>buccalis</i>           | 2218 | 465  | 820  | 388  | 545  |
| UP000001916 | 526227 | <i>Meiothermus</i>        | <i>silvanus</i>           | 3383 | 624  | 1258 | 606  | 895  |
| UP000001917 | 521098 | <i>Alicyclobacillus</i>   | <i>acidocaldarius</i>     | 3059 | 565  | 1133 | 574  | 787  |
| UP000001918 | 471852 | <i>Thermomonospora</i>    | <i>curvata</i>            | 4888 | 946  | 1859 | 884  | 1199 |
| UP000001919 | 446465 | <i>Brachybacterium</i>    | <i>faecium</i>            | 3062 | 390  | 1284 | 622  | 766  |
| UP000001932 | 343509 | <i>Sodalis</i>            | <i>glossinidius</i>       | 2490 | 273  | 1203 | 478  | 536  |
| UP000001933 | 56780  | <i>Syntrophus</i>         | <i>aciditrophicus</i>     | 3145 | 751  | 1033 | 566  | 795  |
| UP000001935 | 290397 | <i>Anaeromyxobacter</i>   | <i>dehalogenans</i>       | 4345 | 764  | 1601 | 823  | 1157 |
| UP000001942 | 222891 | <i>Neorickettsia</i>      | <i>sennetsu</i>           | 932  | 295  | 332  | 124  | 181  |
| UP000001943 | 212042 | <i>Anaplasma</i>          | <i>phagocytophilum</i>    | 1330 | 530  | 459  | 130  | 211  |
| UP000001946 | 138119 | <i>Desulfitobacterium</i> | <i>hafniense</i>          | 5014 | 664  | 1859 | 1006 | 1485 |
| UP000001947 | 203122 | <i>Saccharophagus</i>     | <i>degradans</i>          | 3999 | 649  | 1563 | 790  | 997  |
| UP000001953 | 323097 | <i>Nitrobacter</i>        | <i>hamburgensis</i>       | 4243 | 929  | 1672 | 755  | 887  |
| UP000001955 | 630626 | <i>Shimwellia</i>         | <i>blattae</i>            | 3870 | 345  | 1723 | 829  | 973  |
| UP000001959 | 228405 | <i>Hyphomonas</i>         | <i>neptunium</i>          | 3499 | 545  | 1432 | 692  | 830  |
| UP000001962 | 187272 | <i>Alkalilimnicola</i>    | <i>ehrichii</i>           | 2862 | 273  | 1169 | 631  | 789  |
| UP000001963 | 391165 | <i>Granulibacter</i>      | <i>bethesdensis</i>       | 2430 | 465  | 1014 | 461  | 625  |
| UP000001964 | 394221 | <i>Maricaulis</i>         | <i>maris</i>              | 3060 | 460  | 1244 | 635  | 721  |
| UP000001968 | 335541 | <i>Syntrophomonas</i>     | <i>wolfei</i>             | 2473 | 295  | 994  | 504  | 680  |
| UP000001978 | 272563 | <i>Peptoclostridium</i>   | <i>difficile</i>          | 3762 | 531  | 1414 | 714  | 1102 |
| UP000001981 | 342610 | <i>Pseudoalteromonas</i>  | <i>atlantica</i>          | 4271 | 521  | 1713 | 933  | 1104 |
| UP000001989 | 392499 | <i>Sphingomonas</i>       | <i>wittichii</i>          | 5313 | 677  | 2080 | 1252 | 1304 |
| UP000002007 | 288705 | <i>Renibacterium</i>      | <i>salmoninarum</i>       | 3421 | 678  | 1427 | 582  | 734  |
| UP000002008 | 324602 | <i>Chloroflexus</i>       | <i>aurantiacus</i>        | 3850 | 536  | 1415 | 729  | 1170 |
| UP000002010 | 557598 | <i>Laribacter</i>         | <i>hongkongensis</i>      | 3208 | 638  | 1282 | 568  | 720  |
| UP000002011 | 471854 | <i>Dyadobacter</i>        | <i>fermentans</i>         | 5703 | 1144 | 1960 | 1113 | 1486 |
| UP000002012 | 522772 | <i>Denitrovibrio</i>      | <i>acetiphilus</i>        | 2901 | 410  | 1076 | 588  | 827  |
| UP000002016 | 416591 | <i>Pseudothermotoga</i>   | <i>lettingae</i>          | 2040 | 190  | 826  | 436  | 588  |
| UP000002019 | 459349 | <i>Cloacimonas</i>        | <i>acidaminovorans</i>    | 1813 | 418  | 613  | 327  | 455  |
| UP000002020 | 482235 | <i>Phytoplasma</i>        | <i>mali</i>               | 448  | 101  | 158  | 75   | 114  |
| UP000002026 | 471855 | <i>Slackia</i>            | <i>heliotrinireducens</i> | 2750 | 477  | 1050 | 510  | 713  |
| UP000002027 | 479434 | <i>Sphaerobacter</i>      | <i>thermophilus</i>       | 3471 | 519  | 1260 | 709  | 983  |
| UP000002028 | 504472 | <i>Spirosoma</i>          | <i>linguale</i>           | 6867 | 1536 | 2413 | 1185 | 1733 |
| UP000002029 | 479432 | <i>Streptosporangium</i>  | <i>roseum</i>             | 8955 | 1680 | 3126 | 1780 | 2369 |
| UP000002030 | 525903 | <i>Thermanaerovibrio</i>  | <i>acidaminovorans</i>    | 1737 | 173  | 744  | 366  | 454  |
| UP000002043 | 638303 | <i>Thermocrinis</i>       | <i>albus</i>              | 1592 | 194  | 664  | 307  | 427  |
| UP000002045 | 406818 | <i>Xenorhabdus</i>        | <i>bovienii</i>           | 4102 | 971  | 1612 | 698  | 821  |
| UP000002072 | 519441 | <i>Streptobacillus</i>    | <i>moniliformis</i>       | 1431 | 294  | 525  | 244  | 368  |
| UP000002139 | 448385 | <i>Sorangium</i>          | <i>cellulosum</i>         | 9320 | 2725 | 2872 | 1428 | 2295 |
| UP000002156 | 340099 | <i>Thermoanaerobacter</i> | <i>pseudethanolicus</i>   | 2193 | 192  | 889  | 433  | 679  |

|             |        |                         |                             |      |      |      |      |      |
|-------------|--------|-------------------------|-----------------------------|------|------|------|------|------|
| UP000002171 | 207954 | <i>Neptuniibacter</i>   | <i>caesariensis</i>         | 3687 | 483  | 1471 | 753  | 980  |
| UP000002185 | 75379  | <i>Thiomonas</i>        | <i>intermedia</i>           | 3134 | 323  | 1347 | 632  | 832  |
| UP000002191 | 643562 | <i>Desulfovibrio</i>    | <i>aespoeensis</i>          | 3269 | 521  | 1213 | 647  | 888  |
| UP000002192 | 203907 | <i>Blochmannia</i>      | <i>floridanus</i>           | 583  | 1    | 286  | 149  | 147  |
| UP000002200 | 203267 | <i>Tropheryma</i>       | <i>whipplei</i>             | 805  | 115  | 346  | 145  | 199  |
| UP000002204 | 234621 | <i>Rhodococcus</i>      | <i>erythropolis</i>         | 6424 | 1064 | 2486 | 1301 | 1573 |
| UP000002207 | 240015 | <i>Acidobacterium</i>   | <i>capsulatum</i>           | 3363 | 678  | 1164 | 606  | 915  |
| UP000002208 | 546414 | <i>Deinococcus</i>      | <i>deserti</i>              | 3459 | 651  | 1315 | 624  | 869  |
| UP000002209 | 379066 | <i>Gemmatimonas</i>     | <i>aurantiaca</i>           | 3932 | 748  | 1448 | 759  | 977  |
| UP000002213 | 446462 | <i>Actinosynnema</i>    | <i>mirum</i>                | 6912 | 1407 | 2526 | 1264 | 1715 |
| UP000002215 | 485918 | <i>Chitinophaga</i>     | <i>pinensis</i>             | 7179 | 1590 | 2270 | 1375 | 1944 |
| UP000002216 | 525897 | <i>Desulfomicrobium</i> | <i>baculatum</i>            | 3421 | 444  | 1336 | 651  | 990  |
| UP000002218 | 479431 | <i>Nakamurella</i>      | <i>multipartita</i>         | 5123 | 946  | 1940 | 990  | 1247 |
| UP000002219 | 446468 | <i>Nocardiosis</i>      | <i>dassonvillei</i>         | 5497 | 945  | 2091 | 1086 | 1375 |
| UP000002220 | 521674 | <i>Planctopirus</i>     | <i>limnophila</i>           | 4258 | 1288 | 1364 | 726  | 880  |
| UP000002221 | 518766 | <i>Rhodothermus</i>     | <i>marinus</i>              | 2861 | 415  | 1068 | 540  | 838  |
| UP000002222 | 525898 | <i>Sulfurospirillum</i> | <i>deleyianum</i>           | 2243 | 324  | 905  | 468  | 546  |
| UP000002247 | 640132 | <i>Segniliparus</i>     | <i>rotundus</i>             | 3001 | 749  | 1149 | 491  | 612  |
| UP000002255 | 446471 | <i>Xylanimonas</i>      | <i>cellulosilytica</i>      | 3441 | 625  | 1370 | 651  | 795  |
| UP000002257 | 395965 | <i>Methylocella</i>     | <i>silvestris</i>           | 3816 | 702  | 1497 | 742  | 875  |
| UP000002294 | 525919 | <i>Anaerococcus</i>     | <i>prevotii</i>             | 1795 | 245  | 686  | 333  | 531  |
| UP000002297 | 216432 | <i>Croceibacter</i>     | <i>atlanticus</i>           | 2702 | 528  | 1023 | 479  | 672  |
| UP000002301 | 439375 | <i>Ochrobactrum</i>     | <i>anthropi</i>             | 4757 | 583  | 2029 | 913  | 1232 |
| UP000002318 | 573413 | <i>Spirochaeta</i>      | <i>smaragdinae</i>          | 4211 | 598  | 1625 | 877  | 1111 |
| UP000002334 | 572265 | <i>Hamiltonella</i>     | <i>defensa</i>              | 2045 | 565  | 812  | 323  | 345  |
| UP000002349 | 552811 | <i>Dehalogenimonas</i>  | <i>lykanthroporepellens</i> | 1619 | 283  | 614  | 294  | 428  |
| UP000002360 | 688245 | <i>Comamonas</i>        | <i>testosteroni</i>         | 4780 | 610  | 1938 | 1080 | 1152 |
| UP000002361 | 272942 | <i>Rhodobacter</i>      | <i>capsulatus</i>           | 3632 | 579  | 1543 | 679  | 831  |
| UP000002366 | 572547 | <i>Aminobacterium</i>   | <i>colombiense</i>          | 1872 | 211  | 771  | 403  | 487  |
| UP000002368 | 562970 | <i>Kyrpidia</i>         | <i>tusciae</i>              | 3135 | 410  | 1262 | 624  | 839  |
| UP000002377 | 635013 | <i>Thermincola</i>      | <i>potens</i>               | 2908 | 389  | 1151 | 524  | 844  |
| UP000002382 | 521045 | <i>Kosmotoga</i>        | <i>olearia</i>              | 2087 | 288  | 794  | 418  | 587  |
| UP000002383 | 396588 | <i>Thioalkalivibrio</i> | <i>sulfidiphilus</i>        | 3272 | 445  | 1391 | 608  | 828  |
| UP000002402 | 246197 | <i>Myxococcus</i>       | <i>xanthus</i>              | 7314 | 1948 | 2337 | 1227 | 1802 |
| UP000002415 | 381764 | <i>Fervidobacterium</i> | <i>nodosum</i>              | 1725 | 195  | 674  | 345  | 511  |
| UP000002417 | 78245  | <i>Xanthobacter</i>     | <i>autotrophicus</i>        | 4971 | 710  | 2070 | 949  | 1242 |
| UP000002424 | 322710 | <i>Azotobacter</i>      | <i>vinelandii</i>           | 4990 | 849  | 1968 | 954  | 1219 |
| UP000002427 | 374463 | <i>Baumannia</i>        | <i>cicadellinicola</i>      | 595  | 6    | 287  | 131  | 171  |
| UP000002429 | 266264 | <i>Cupriavidus</i>      | <i>metallidurans</i>        | 6364 | 1107 | 2420 | 1339 | 1498 |
| UP000002430 | 363253 | <i>Lawsonia</i>         | <i>intracellularis</i>      | 1342 | 172  | 558  | 242  | 369  |
| UP000002432 | 204669 | <i>Koribacter</i>       | <i>versatilis</i>           | 4771 | 977  | 1625 | 892  | 1277 |
| UP000002440 | 265072 | <i>Methylobacillus</i>  | <i>flagellatus</i>          | 2609 | 293  | 1091 | 522  | 703  |
| UP000002480 | 272947 | <i>Rickettsia</i>       | <i>prowazekii</i>           | 834  | 61   | 388  | 155  | 230  |
| UP000002514 | 243265 | <i>Photorhabdus</i>     | <i>luminescens</i>          | 4556 | 792  | 1961 | 793  | 1010 |



|             |         |                           |                              |      |      |      |      |      |
|-------------|---------|---------------------------|------------------------------|------|------|------|------|------|
| UP000002523 | 262768  | <i>Onion</i>              | <i>yellow</i> s              | 730  | 199  | 271  | 101  | 159  |
| UP000002526 | 224911  | <i>Bradyrhizobium</i>     | <i>diazoefficiens</i>        | 8253 | 1469 | 3181 | 1589 | 2014 |
| UP000002528 | 335992  | <i>Pelagibacter</i>       | <i>ubique</i>                | 1354 | 125  | 617  | 267  | 345  |
| UP000002534 | 338963  | <i>Pelobacter</i>         | <i>carbinolicus</i>          | 3292 | 519  | 1215 | 659  | 899  |
| UP000002569 | 668336  | <i>Aggregatibacter</i>    | <i>actinomycetemcomitans</i> | 2276 | 184  | 882  | 408  | 499  |
| UP000002572 | 653733  | <i>Desulfurispirillum</i> | <i>indicum</i>               | 2551 | 340  | 986  | 495  | 730  |
| UP000002574 | 608538  | <i>Hydrogenobacter</i>    | <i>thermophilus</i>          | 1892 | 307  | 749  | 352  | 484  |
| UP000002586 | 156889  | <i>Magnetococcus</i>      | <i>marinus</i>               | 3594 | 719  | 1261 | 673  | 941  |
| UP000002587 | 413404  | <i>Ruthia</i>             | <i>magnifica</i>             | 976  | 62   | 440  | 199  | 275  |
| UP000002596 | 397945  | <i>Acidovorax</i>         | <i>citrulli</i>              | 4602 | 789  | 1798 | 927  | 1088 |
| UP000002620 | 429009  | <i>Ammonifex</i>          | <i>degensii</i>              | 2077 | 309  | 797  | 399  | 572  |
| UP000002663 | 945021  | <i>Tetragenococcus</i>    | <i>halophilus</i>            | 2507 | 312  | 1007 | 481  | 707  |
| UP000002671 | 227377  | <i>Coxiella</i>           | <i>burnetii</i>              | 1815 | 456  | 639  | 315  | 402  |
| UP000002696 | 633149  | <i>Brevundimonas</i>      | <i>subvibrioides</i>         | 3326 | 618  | 1385 | 605  | 718  |
| UP000002706 | 246194  | <i>Carboxydotherrus</i>   | <i>hydrogenoformans</i>      | 2615 | 480  | 966  | 469  | 700  |
| UP000002713 | 317025  | <i>Thiomicrospira</i>     | <i>crunogena</i>             | 2187 | 214  | 927  | 449  | 597  |
| UP000002714 | 326298  | <i>Sulfurimonas</i>       | <i>denitrificans</i>         | 2084 | 305  | 825  | 436  | 518  |
| UP000002716 | 300267  | <i>Shigella</i>           | <i>dysenteriae</i>           | 3897 | 338  | 1830 | 747  | 982  |
| UP000002717 | 1140    | <i>Synechococcus</i>      | <i>elongatus</i>             | 2657 | 423  | 1121 | 479  | 634  |
| UP000002718 | 323848  | <i>Nitrosospira</i>       | <i>multiformis</i>           | 2732 | 398  | 1092 | 568  | 674  |
| UP000002719 | 359391  | <i>Brucella</i>           | <i>abortus</i>               | 3022 | 489  | 1210 | 574  | 750  |
| UP000002724 | 324925  | <i>Pelodictyon</i>        | <i>phaeoelathratiforme</i>   | 2685 | 415  | 1085 | 502  | 683  |
| UP000002725 | 290512  | <i>Prosthecochloris</i>   | <i>aestuarii</i>             | 2319 | 352  | 911  | 451  | 605  |
| UP000002741 | 573234  | <i>Hodgkinia</i>          | <i>cicadicola</i>            | 169  | 45   | 87   | 22   | 15   |
| UP000002743 | 582744  | <i>Methylovorus</i>       | <i>glucosetrophus</i>        | 2907 | 449  | 1121 | 582  | 755  |
| UP000002745 | 582402  | <i>Hirschia</i>           | <i>baltica</i>               | 3187 | 469  | 1286 | 693  | 739  |
| UP000002774 | 714943  | <i>Mucilaginibacter</i>   | <i>paludis</i>               | 6864 | 1843 | 2103 | 1218 | 1700 |
| UP000002875 | 929562  | <i>Emticicia</i>          | <i>oligotrophica</i>         | 4251 | 725  | 1608 | 782  | 1136 |
| UP000002881 | 660470  | <i>Mesotoga</i>           | <i>prima</i>                 | 2499 | 422  | 974  | 493  | 610  |
| UP000002892 | 646529  | <i>Desulfosporosinus</i>  | <i>acidiphilus</i>           | 4469 | 865  | 1525 | 835  | 1244 |
| UP000002914 | 391619  | <i>Phaeobacter</i>        | <i>inhibens</i>              | 3853 | 460  | 1680 | 771  | 942  |
| UP000002931 | 314271  | <i>Maritimibacter</i>     | <i>alkaliphilus</i>          | 4692 | 962  | 1876 | 864  | 990  |
| UP000002938 | 702450  | <i>Turcibacter</i>        | <i>sanguinis</i>             | 2779 | 429  | 1057 | 522  | 771  |
| UP000002939 | 626369  | <i>Granulicatella</i>     | <i>elegans</i>               | 1562 | 146  | 656  | 301  | 459  |
| UP000002941 | 1125718 | <i>Actinomyces</i>        | <i>massiliensis</i>          | 3129 | 821  | 1148 | 555  | 605  |
| UP000002945 | 391587  | <i>Kordia</i>             | <i>algicida</i>              | 4477 | 1463 | 1451 | 673  | 890  |
| UP000002949 | 1082933 | <i>Mesorhizobium</i>      | <i>amorphae</i>              | 7083 | 1239 | 2843 | 1352 | 1649 |
| UP000002975 | 469605  | <i>Fusobacterium</i>      | <i>gonidiaformans</i>        | 1890 | 353  | 726  | 326  | 485  |
| UP000003009 | 629741  | <i>Kingella</i>           | <i>oralis</i>                | 3160 | 1322 | 990  | 353  | 495  |
| UP000003011 | 679200  | <i>Johnsonella</i>        | <i>ignava</i>                | 2284 | 384  | 880  | 443  | 577  |
| UP000003045 | 871571  | <i>Mobiluncus</i>         | <i>mulieris</i>              | 2379 | 683  | 857  | 401  | 438  |
| UP000003053 | 313594  | <i>Polaribacter</i>       | <i>irgensii</i>              | 2556 | 570  | 956  | 438  | 592  |
| UP000003058 | 765914  | <i>Thiorhodospira</i>     | <i>sibirica</i>              | 2933 | 455  | 1182 | 560  | 736  |
| UP000003087 | 344747  | <i>Gimesia</i>            | <i>maris</i>                 | 6463 | 2057 | 1919 | 1063 | 1424 |

|             |         |                             |                         |      |      |      |      |      |
|-------------|---------|-----------------------------|-------------------------|------|------|------|------|------|
| UP000003111 | 585531  | <i>Aeromicrobium</i>        | <i>marinum</i>          | 3077 | 549  | 1206 | 537  | 785  |
| UP000003195 | 706434  | <i>Megasphaera</i>          | <i>micronuciformis</i>  | 1771 | 289  | 694  | 377  | 411  |
| UP000003226 | 1163407 | <i>Rhodanobacter</i>        | <i>spathiphylli</i>     | 3438 | 457  | 1406 | 692  | 883  |
| UP000003240 | 1009370 | <i>Acetonema</i>            | <i>longum</i>           | 4283 | 851  | 1636 | 759  | 1037 |
| UP000003244 | 596315  | <i>Peptostreptococcus</i>   | <i>stomatis</i>         | 1600 | 117  | 611  | 342  | 530  |
| UP000003254 | 471875  | <i>Ruminococcus</i>         | <i>lactaris</i>         | 2706 | 666  | 939  | 455  | 646  |
| UP000003257 | 391624  | <i>Oceanibulbus</i>         | <i>indolifex</i>        | 4147 | 682  | 1779 | 748  | 938  |
| UP000003277 | 742743  | <i>Dialister</i>            | <i>succinatiphilus</i>  | 2140 | 440  | 812  | 404  | 484  |
| UP000003280 | 862517  | <i>Peptoniphilus</i>        | <i>duerdenii</i>        | 1987 | 325  | 790  | 347  | 525  |
| UP000003295 | 521003  | <i>Collinsella</i>          | <i>intestinalis</i>     | 1783 | 431  | 643  | 325  | 384  |
| UP000003374 | 314278  | <i>Nitrococcus</i>          | <i>mobilis</i>          | 3484 | 668  | 1475 | 581  | 760  |
| UP000003438 | 411471  | <i>Subdoligranulum</i>      | <i>variabile</i>        | 3378 | 889  | 1134 | 589  | 766  |
| UP000003460 | 626522  | <i>Alloprevotella</i>       | <i>tannerae</i>         | 2806 | 1168 | 808  | 364  | 466  |
| UP000003494 | 626523  | <i>Shuttleworthia</i>       | <i>satelles</i>         | 2247 | 620  | 751  | 357  | 519  |
| UP000003544 | 1026882 | <i>Methylophaga</i>         | <i>aminisulfivorans</i> | 3174 | 467  | 1237 | 634  | 836  |
| UP000003586 | 929713  | <i>Niabella</i>             | <i>solis</i>            | 4110 | 936  | 1475 | 740  | 959  |
| UP000003599 | 883103  | <i>Dolosigranulum</i>       | <i>pigrum</i>           | 1691 | 207  | 694  | 325  | 465  |
| UP000003635 | 314256  | <i>Oceanicola</i>           | <i>granulosus</i>       | 3791 | 491  | 1650 | 769  | 881  |
| UP000003639 | 411467  | <i>Pseudoflavonifractor</i> | <i>capillosus</i>       | 4804 | 1697 | 1434 | 678  | 995  |
| UP000003671 | 500635  | <i>Mitsuokella</i>          | <i>multacida</i>        | 2558 | 533  | 902  | 464  | 659  |
| UP000003688 | 320771  | <i>Pedosphaera</i>          | <i>parvula</i>          | 6492 | 2097 | 1921 | 953  | 1521 |
| UP000003701 | 585503  | <i>Selenomonas</i>          | <i>noxia</i>            | 2020 | 313  | 811  | 401  | 495  |
| UP000003704 | 1172194 | <i>Hydrocarboniphaga</i>    | <i>effusa</i>           | 4474 | 795  | 1611 | 926  | 1142 |
| UP000003730 | 1046627 | <i>Bizionia</i>             | <i>argentiniensis</i>   | 3095 | 746  | 1090 | 542  | 717  |
| UP000003764 | 655812  | <i>Aerococcus</i>           | <i>viridans</i>         | 1929 | 235  | 792  | 384  | 518  |
| UP000003803 | 445972  | <i>Anaerotruncus</i>        | <i>colithominis</i>     | 4421 | 1571 | 1408 | 628  | 814  |
| UP000003806 | 885272  | <i>Jonquetella</i>          | <i>anthropi</i>         | 1508 | 153  | 663  | 314  | 378  |
| UP000003835 | 118168  | <i>Coleofasciculus</i>      | <i>chthonoplastes</i>   | 8193 | 3170 | 2408 | 934  | 1681 |
| UP000003844 | 865937  | <i>Gillisia</i>             | <i>limnaea</i>          | 3411 | 644  | 1314 | 588  | 865  |
| UP000003900 | 1131935 | <i>Paenibacillus</i>        | <i>dendritiformis</i>   | 5660 | 921  | 2131 | 1067 | 1541 |
| UP000003919 | 388413  | <i>Algoriphagus</i>         | <i>machipongonensis</i> | 3932 | 616  | 1549 | 756  | 1011 |
| UP000003922 | 165597  | <i>Crocospaera</i>          | <i>watsonii</i>         | 5659 | 1141 | 2386 | 1039 | 1093 |
| UP000003947 | 864069  | <i>Microvirga</i>           | <i>lotononidis</i>      | 6918 | 1509 | 2540 | 1333 | 1536 |
| UP000003959 | 489825  | <i>Moorea</i>               | <i>producens</i>        | 7382 | 2538 | 2313 | 954  | 1577 |
| UP000004057 | 570509  | <i>Spiroplasma</i>          | <i>melliferum</i>       | 1154 | 431  | 357  | 171  | 195  |
| UP000004095 | 313606  | <i>Microscilla</i>          | <i>marina</i>           | 8248 | 3381 | 2135 | 1042 | 1690 |
| UP000004097 | 706433  | <i>Solobacterium</i>        | <i>moorei</i>           | 2034 | 363  | 799  | 354  | 518  |
| UP000004121 | 585501  | <i>Oribacterium</i>         | <i>sinus</i>            | 2638 | 642  | 960  | 494  | 542  |
| UP000004165 | 910954  | <i>Dietzia</i>              | <i>cinnamea</i>         | 3537 | 662  | 1473 | 625  | 777  |
| UP000004169 | 1150626 | <i>Phaeospirillum</i>       | <i>molischianum</i>     | 3771 | 897  | 1376 | 638  | 860  |
| UP000004191 | 883114  | <i>Helcococcus</i>          | <i>kunzii</i>           | 1876 | 294  | 737  | 367  | 478  |
| UP000004200 | 765913  | <i>Thiorhodococcus</i>      | <i>drewsii</i>          | 4731 | 728  | 1924 | 890  | 1189 |
| UP000004221 | 1129897 | <i>Nitrolancea</i>          | <i>hollandica</i>       | 3969 | 1533 | 1177 | 526  | 733  |
| UP000004263 | 207949  | <i>Bermanella</i>           | <i>marisrubri</i>       | 3303 | 538  | 1264 | 672  | 829  |

|             |         |                              |                          |       |      |      |      |      |
|-------------|---------|------------------------------|--------------------------|-------|------|------|------|------|
| UP000004291 | 411684  | <i>Hoeflea</i>               | <i>phototrophica</i>     | 4185  | 511  | 1803 | 869  | 1002 |
| UP000004310 | 314231  | <i>Fulvimarina</i>           | <i>pelagi</i>            | 3739  | 721  | 1567 | 676  | 775  |
| UP000004315 | 518637  | <i>Holdemanella</i>          | <i>biformis</i>          | 2528  | 536  | 932  | 479  | 581  |
| UP000004324 | 1149862 | <i>Pelosinus</i>             | <i>fermentans</i>        | 4690  | 731  | 1762 | 898  | 1299 |
| UP000004358 | 314230  | <i>Blastopirellula</i>       | <i>marina</i>            | 6010  | 2066 | 1752 | 1000 | 1192 |
| UP000004367 | 1089455 | <i>Mobilicoccus</i>          | <i>pelagi</i>            | 3112  | 542  | 1241 | 610  | 719  |
| UP000004374 | 562729  | <i>Rheinheimera</i>          | <i>nanhaiensis</i>       | 3730  | 660  | 1429 | 736  | 905  |
| UP000004459 | 411475  | <i>Flavonifractor</i>        | <i>plautii</i>           | 4278  | 1320 | 1422 | 672  | 864  |
| UP000004465 | 883111  | <i>Facklamia</i>             | <i>hominis</i>           | 1717  | 213  | 703  | 324  | 477  |
| UP000004474 | 1210046 | <i>Janibacter</i>            | <i>hoylei</i>            | 3070  | 596  | 1247 | 542  | 685  |
| UP000004478 | 1225176 | <i>Cecemia</i>               | <i>lonarensis</i>        | 4213  | 897  | 1600 | 757  | 959  |
| UP000004507 | 314232  | <i>Loktanela</i>             | <i>vestfoldensis</i>     | 3061  | 452  | 1299 | 601  | 709  |
| UP000004508 | 485913  | <i>Ktedonobacter</i>         | <i>racemifer</i>         | 11211 | 3281 | 3085 | 1817 | 3028 |
| UP000004510 | 742159  | <i>Achromobacter</i>         | <i>piechaudii</i>        | 5755  | 751  | 2309 | 1233 | 1462 |
| UP000004528 | 585506  | <i>Weissella</i>             | <i>paramesenteroides</i> | 1952  | 300  | 762  | 379  | 511  |
| UP000004547 | 1160710 | <i>Microbacterium</i>        | <i>laevaniformans</i>    | 3249  | 683  | 1263 | 574  | 729  |
| UP000004619 | 411483  | <i>Faecalibacterium</i>      | <i>prausnitzii</i>       | 3472  | 1022 | 1227 | 546  | 677  |
| UP000004622 | 1189611 | <i>Nitratireductor</i>       | <i>aquibiodomus</i>      | 4240  | 508  | 1931 | 830  | 971  |
| UP000004664 | 697282  | <i>Methylobacter</i>         | <i>tundripaludum</i>     | 4194  | 794  | 1639 | 751  | 1010 |
| UP000004671 | 880073  | <i>Caldithrix</i>            | <i>abyssi</i>            | 3674  | 616  | 1242 | 727  | 1089 |
| UP000004685 | 575590  | <i>Bacteroidetes</i>         | <i>oral</i>              | 1854  | 417  | 696  | 304  | 437  |
| UP000004690 | 926559  | <i>Joostella</i>             | <i>marina</i>            | 3783  | 740  | 1384 | 717  | 942  |
| UP000004699 | 565045  | <i>Luminiphilus</i>          | <i>syltensis</i>         | 2923  | 425  | 1141 | 629  | 728  |
| UP000004703 | 244592  | <i>Labrenzia</i>             | <i>alexandrii</i>        | 5363  | 1031 | 2094 | 1040 | 1198 |
| UP000004728 | 983920  | <i>Novosphingobium</i>       | <i>nitrogenifigens</i>   | 3800  | 609  | 1514 | 785  | 892  |
| UP000004750 | 797473  | <i>Cardiobacterium</i>       | <i>valvarum</i>          | 3026  | 1002 | 1100 | 417  | 507  |
| UP000004754 | 887929  | <i>Pseudoramibacter</i>      | <i>alactolyticus</i>     | 2514  | 620  | 885  | 435  | 574  |
| UP000004793 | 511051  | <i>Caldisericum</i>          | <i>exile</i>             | 1566  | 233  | 606  | 310  | 417  |
| UP000004913 | 742766  | <i>Dysgonomonas</i>          | <i>gadei</i>             | 4153  | 775  | 1482 | 828  | 1068 |
| UP000004923 | 626939  | <i>Phascolarctobacterium</i> | <i>succinatutens</i>     | 2148  | 386  | 841  | 393  | 528  |
| UP000004946 | 864564  | <i>Parascardovia</i>         | <i>denticolens</i>       | 1679  | 417  | 627  | 281  | 354  |
| UP000004947 | 313628  | <i>Lentisphaera</i>          | <i>araneosa</i>          | 4982  | 1266 | 1668 | 958  | 1090 |
| UP000004956 | 762967  | <i>Sutterella</i>            | <i>parvirubra</i>        | 2483  | 664  | 914  | 409  | 496  |
| UP000004968 | 566550  | <i>Hungatella</i>            | <i>hathewayi</i>         | 7571  | 2178 | 2654 | 1268 | 1471 |
| UP000005017 | 679192  | <i>Bulleidia</i>             | <i>extracta</i>          | 1415  | 270  | 546  | 242  | 357  |
| UP000005019 | 1000565 | <i>Methyloversatilis</i>     | <i>universalis</i>       | 3919  | 597  | 1569 | 757  | 996  |
| UP000005089 | 556269  | <i>Oxalobacter</i>           | <i>formigenes</i>        | 2076  | 256  | 858  | 399  | 563  |
| UP000005090 | 686340  | <i>Methylomicrobium</i>      | <i>album</i>             | 3738  | 656  | 1501 | 686  | 895  |
| UP000005096 | 584708  | <i>Aminomonas</i>            | <i>paucivorans</i>       | 2391  | 266  | 987  | 517  | 621  |
| UP000005139 | 401526  | <i>Thermosinus</i>           | <i>carboxydivorans</i>   | 2738  | 260  | 1188 | 555  | 735  |
| UP000005143 | 1097667 | <i>Patulibacter</i>          | <i>medicamentivorans</i> | 4372  | 935  | 1564 | 850  | 1023 |
| UP000005178 | 445971  | <i>Anaerofustis</i>          | <i>stercorihominis</i>   | 2331  | 463  | 843  | 402  | 623  |
| UP000005219 | 693746  | <i>Oscillibacter</i>         | <i>valericigenes</i>     | 4593  | 1243 | 1616 | 755  | 979  |
| UP000005234 | 767434  | <i>Frateuria</i>             | <i>aurantia</i>          | 3098  | 383  | 1260 | 679  | 776  |

|             |         |                            |                       |      |      |      |      |      |
|-------------|---------|----------------------------|-----------------------|------|------|------|------|------|
| UP000005258 | 1110502 | <i>Tistrella</i>           | <i>mobilis</i>        | 5778 | 696  | 2416 | 1201 | 1465 |
| UP000005267 | 1036672 | <i>Advenella</i>           | <i>kashmirensis</i>   | 3933 | 582  | 1785 | 772  | 794  |
| UP000005275 | 765910  | <i>Marichromatium</i>      | <i>purpuratum</i>     | 3249 | 401  | 1344 | 623  | 881  |
| UP000005297 | 314345  | <i>Mariprofundus</i>       | <i>ferrooxydans</i>   | 2856 | 537  | 1117 | 518  | 684  |
| UP000005307 | 391626  | <i>Octadecabacter</i>      | <i>antarcticus</i>    | 4327 | 818  | 1776 | 854  | 879  |
| UP000005316 | 1027292 | <i>Sporosarcina</i>        | <i>newyorkensis</i>   | 3825 | 698  | 1505 | 704  | 918  |
| UP000005317 | 870187  | <i>Thiothrix</i>           | <i>nivea</i>          | 4218 | 788  | 1662 | 790  | 978  |
| UP000005324 | 525371  | <i>Roseomonas</i>          | <i>cervicalis</i>     | 4774 | 940  | 2026 | 845  | 963  |
| UP000005380 | 717772  | <i>Thioalkalimicrobium</i> | <i>aerophilum</i>     | 2067 | 250  | 851  | 418  | 548  |
| UP000005436 | 203275  | <i>Tannerella</i>          | <i>forsythia</i>      | 2978 | 876  | 923  | 526  | 653  |
| UP000005438 | 700598  | <i>Niastella</i>           | <i>koreensis</i>      | 7171 | 1660 | 2368 | 1276 | 1867 |
| UP000005459 | 768671  | <i>Thiocapsa</i>           | <i>marina</i>         | 4915 | 976  | 1934 | 865  | 1140 |
| UP000005481 | 861450  | <i>Anaeroglobus</i>        | <i>geminatus</i>      | 2148 | 475  | 846  | 412  | 415  |
| UP000005496 | 555779  | <i>Desulfonatrosospira</i> | <i>thiodismutans</i>  | 3577 | 764  | 1368 | 617  | 828  |
| UP000005551 | 1189621 | <i>Nitritalea</i>          | <i>halalkaliphila</i> | 3102 | 873  | 1182 | 466  | 581  |
| UP000005561 | 478749  | <i>Marvinbryantia</i>      | <i>formatexigens</i>  | 4894 | 1472 | 1549 | 828  | 1045 |
| UP000005566 | 1086011 | <i>Flavobacterium</i>      | <i>frigoris</i>       | 3590 | 838  | 1244 | 635  | 873  |
| UP000005631 | 926562  | <i>Owenweeksia</i>         | <i>hongkongensis</i>  | 3471 | 813  | 1231 | 605  | 822  |
| UP000005632 | 158190  | <i>Sphaerochaeta</i>       | <i>pleomorpha</i>     | 3150 | 407  | 1256 | 666  | 821  |
| UP000005633 | 640081  | <i>Dechlorosoma</i>        | <i>suillum</i>        | 3432 | 405  | 1372 | 721  | 934  |
| UP000005667 | 862719  | <i>Azospirillum</i>        | <i>lipoferum</i>      | 6062 | 1133 | 2222 | 1105 | 1602 |
| UP000005695 | 281689  | <i>Desulfuromonas</i>      | <i>acetoxidans</i>    | 3204 | 435  | 1224 | 634  | 911  |
| UP000005707 | 1033810 | <i>Haloplasma</i>          | <i>contractile</i>    | 3019 | 652  | 1088 | 521  | 758  |
| UP000005713 | 388399  | <i>Sagittula</i>           | <i>stellata</i>       | 5025 | 860  | 2086 | 978  | 1101 |
| UP000005714 | 585530  | <i>Brevibacterium</i>      | <i>mcbrellneri</i>    | 2432 | 434  | 975  | 468  | 555  |
| UP000005737 | 929563  | <i>Leptonema</i>           | <i>illini</i>         | 4129 | 1059 | 1479 | 684  | 907  |
| UP000005744 | 395493  | <i>Beggiatoa</i>           | <i>alba</i>           | 3440 | 542  | 1294 | 632  | 972  |
| UP000005777 | 641146  | <i>Scardovia</i>           | <i>inopinata</i>      | 1482 | 251  | 571  | 306  | 354  |
| UP000005778 | 879212  | <i>Desulfobacter</i>       | <i>postgatei</i>      | 3396 | 586  | 1291 | 619  | 900  |
| UP000005785 | 929704  | <i>Myroides</i>            | <i>odoratus</i>       | 3687 | 986  | 1265 | 620  | 816  |
| UP000005801 | 391625  | <i>Plesiocystis</i>        | <i>pacifica</i>       | 8437 | 3128 | 2398 | 1197 | 1714 |
| UP000005824 | 497964  | <i>Chthoniobacter</i>      | <i>flavus</i>         | 6705 | 2048 | 2207 | 1005 | 1445 |
| UP000005837 | 546274  | <i>Eikenella</i>           | <i>corrodens</i>      | 2627 | 939  | 866  | 378  | 444  |
| UP000005868 | 580340  | <i>Thermovirga</i>         | <i>lienii</i>         | 1853 | 159  | 783  | 393  | 518  |
| UP000005870 | 1045855 | <i>Pseudoxanthomonas</i>   | <i>spadix</i>         | 3147 | 408  | 1333 | 615  | 791  |
| UP000005938 | 946077  | <i>Imtechella</i>          | <i>halotolerans</i>   | 2694 | 427  | 1005 | 542  | 720  |
| UP000005939 | 1088868 | <i>Commensalibacter</i>    | <i>intestini</i>      | 2209 | 414  | 878  | 400  | 517  |
| UP000005950 | 545696  | <i>Holdemania</i>          | <i>filiformis</i>     | 4221 | 1215 | 1393 | 686  | 927  |
| UP000005952 | 670307  | <i>Hyphomicrobium</i>      | <i>denitrificans</i>  | 3832 | 955  | 1462 | 625  | 790  |
| UP000005953 | 314283  | <i>Reinekea</i>            | <i>blandensis</i>     | 4236 | 705  | 1638 | 826  | 1067 |
| UP000005954 | 89187   | <i>Roseovarius</i>         | <i>nubinhbens</i>     | 3545 | 498  | 1537 | 702  | 808  |
| UP000005990 | 908337  | <i>Eremococcus</i>         | <i>coleocola</i>      | 1720 | 219  | 696  | 338  | 467  |
| UP000006004 | 546270  | <i>Gemella</i>             | <i>haemohysans</i>    | 1709 | 245  | 676  | 319  | 469  |
| UP000006008 | 742725  | <i>Alistipes</i>           | <i>indistinctus</i>   | 2348 | 411  | 857  | 480  | 600  |

|             |         |                               |                          |      |      |      |      |      |
|-------------|---------|-------------------------------|--------------------------|------|------|------|------|------|
| UP000006034 | 563192  | <i>Bilophila</i>              | <i>wadsworthia</i>       | 3779 | 768  | 1413 | 688  | 910  |
| UP000006048 | 869212  | <i>Turneriella</i>            | <i>parva</i>             | 4092 | 1122 | 1530 | 637  | 803  |
| UP000006049 | 746697  | <i>Aequorivita</i>            | <i>sublithincola</i>     | 3134 | 653  | 1189 | 530  | 762  |
| UP000006050 | 866536  | <i>Belliella</i>              | <i>baltica</i>           | 3609 | 800  | 1306 | 652  | 851  |
| UP000006051 | 867902  | <i>Ornithobacterium</i>       | <i>rhinotracheale</i>    | 2138 | 509  | 781  | 368  | 480  |
| UP000006054 | 880071  | <i>Flexibacter</i>            | <i>litoralis</i>         | 3832 | 1215 | 1224 | 565  | 828  |
| UP000006055 | 706587  | <i>Desulfomonile</i>          | <i>tiedjei</i>           | 5412 | 1330 | 1735 | 906  | 1441 |
| UP000006056 | 926566  | <i>Terriglobus</i>            | <i>roseus</i>            | 3936 | 785  | 1399 | 738  | 1014 |
| UP000006061 | 891968  | <i>Anaerobaculum</i>          | <i>mobile</i>            | 2004 | 176  | 858  | 444  | 526  |
| UP000006062 | 765911  | <i>Thiocystis</i>             | <i>violascens</i>        | 4192 | 753  | 1690 | 740  | 1009 |
| UP000006073 | 1189612 | <i>Indibacter</i>             | <i>alkaliphilus</i>      | 4650 | 1234 | 1611 | 777  | 1028 |
| UP000006078 | 883169  | <i>Turicella</i>              | <i>otitidis</i>          | 1846 | 297  | 785  | 354  | 410  |
| UP000006085 | 883096  | <i>Bergeyella</i>             | <i>zoohelcum</i>         | 2120 | 499  | 817  | 339  | 465  |
| UP000006138 | 713604  | <i>Amycolatopsis</i>          | <i>mediterranei</i>      | 9551 | 1820 | 3392 | 1898 | 2441 |
| UP000006177 | 1048260 | <i>Leptospirillum</i>         | <i>ferriphilum</i>       | 2450 | 681  | 846  | 421  | 502  |
| UP000006178 | 1094508 | <i>Thermoanaerobacterium</i>  | <i>saccharolyticum</i>   | 2778 | 394  | 1092 | 520  | 772  |
| UP000006230 | 314265  | <i>Pelagibaca</i>             | <i>bermudensis</i>       | 5420 | 1022 | 2236 | 1020 | 1142 |
| UP000006242 | 1033802 | <i>Salinisphaera</i>          | <i>shabanensis</i>       | 3524 | 422  | 1464 | 725  | 913  |
| UP000006258 | 525373  | <i>Sphingobacterium</i>       | <i>spiritivorum</i>      | 4471 | 1001 | 1528 | 825  | 1117 |
| UP000006276 | 1228997 | <i>Riemerella</i>             | <i>anatipestifer</i>     | 2187 | 566  | 804  | 367  | 450  |
| UP000006281 | 1179773 | <i>Saccharothrix</i>          | <i>espanaensis</i>       | 8423 | 1893 | 2925 | 1548 | 2057 |
| UP000006286 | 930169  | <i>Alcanivorax</i>            | <i>dieselolei</i>        | 4388 | 495  | 1740 | 954  | 1199 |
| UP000006294 | 698758  | <i>Amphibacillus</i>          | <i>xylanus</i>           | 2384 | 290  | 989  | 441  | 664  |
| UP000006304 | 1133849 | <i>Nocardia</i>               | <i>brasiliensis</i>      | 8414 | 1580 | 3154 | 1660 | 2020 |
| UP000006327 | 493475  | <i>Paraglaciecola</i>         | <i>arctica</i>           | 5330 | 991  | 2005 | 1098 | 1236 |
| UP000006334 | 1127673 | <i>Aliiglaciecola</i>         | <i>lipolytica</i>        | 4327 | 759  | 1651 | 860  | 1057 |
| UP000006362 | 648996  | <i>Thermovibrio</i>           | <i>ammonificans</i>      | 1812 | 329  | 694  | 329  | 460  |
| UP000006365 | 577650  | <i>Desulfobulbus</i>          | <i>propionicus</i>       | 3259 | 518  | 1186 | 604  | 951  |
| UP000006375 | 290633  | <i>Gluconobacter</i>          | <i>oxydans</i>           | 2626 | 451  | 1055 | 505  | 615  |
| UP000006377 | 402881  | <i>Parvibaculum</i>           | <i>lavamentivorans</i>   | 3580 | 381  | 1518 | 709  | 972  |
| UP000006427 | 469381  | <i>Dethiosulfovibrio</i>      | <i>peptidovorans</i>     | 2432 | 326  | 1024 | 491  | 591  |
| UP000006443 | 555088  | <i>Dethiobacter</i>           | <i>alkaliphilus</i>      | 3162 | 469  | 1256 | 614  | 823  |
| UP000006461 | 1144889 | <i>Modestobacter</i>          | <i>marinus</i>           | 5435 | 1061 | 1986 | 1064 | 1324 |
| UP000006462 | 352165  | <i>Pyramidobacter</i>         | <i>piscolens</i>         | 2755 | 705  | 1014 | 493  | 543  |
| UP000006464 | 471881  | <i>Proteus</i>                | <i>penneri</i>           | 4909 | 1065 | 2324 | 789  | 731  |
| UP000006468 | 714995  | <i>Komagataebacter</i>        | <i>hansenii</i>          | 3303 | 754  | 1245 | 617  | 687  |
| UP000006552 | 76114   | <i>Aromatoleum</i>            | <i>aromaticum</i>        | 4483 | 981  | 1622 | 826  | 1054 |
| UP000006556 | 370438  | <i>Pelotomaculum</i>          | <i>thermopropionicum</i> | 2884 | 449  | 1094 | 554  | 787  |
| UP000006578 | 317655  | <i>Sphingopyxis</i>           | <i>alaskensis</i>        | 3184 | 434  | 1364 | 641  | 745  |
| UP000006583 | 795359  | <i>Thermodesulfobacterium</i> | <i>geofontis</i>         | 1594 | 170  | 635  | 343  | 446  |
| UP000006589 | 426355  | <i>Methylobacterium</i>       | <i>radiotolerans</i>     | 6388 | 1448 | 2316 | 1151 | 1473 |
| UP000006621 | 717231  | <i>Flexistipes</i>            | <i>sinusarabici</i>      | 2185 | 228  | 882  | 461  | 614  |
| UP000006633 | 639283  | <i>Starkeya</i>               | <i>novella</i>           | 4424 | 538  | 1926 | 856  | 1104 |
| UP000006637 | 266117  | <i>Rubrobacter</i>            | <i>xylanophilus</i>      | 3127 | 386  | 1191 | 659  | 891  |

|             |         |                            |                           |      |      |      |      |      |
|-------------|---------|----------------------------|---------------------------|------|------|------|------|------|
| UP000006639 | 696127  | <i>Midichloria</i>         | <i>mitochondrii</i>       | 1181 | 347  | 458  | 156  | 220  |
| UP000006640 | 469371  | <i>Thermobispora</i>       | <i>bispora</i>            | 3545 | 544  | 1354 | 695  | 952  |
| UP000006647 | 265311  | <i>Mesoplasma</i>          | <i>florum</i>             | 683  | 129  | 253  | 128  | 173  |
| UP000006650 | 521097  | <i>Capnocytophaga</i>      | <i>ochracea</i>           | 2171 | 462  | 783  | 396  | 530  |
| UP000006657 | 709991  | <i>Odoribacter</i>         | <i>splanchnicus</i>       | 3479 | 607  | 1200 | 736  | 936  |
| UP000006666 | 478801  | <i>Kytococcus</i>          | <i>sedentarius</i>        | 2531 | 434  | 981  | 492  | 624  |
| UP000006683 | 550540  | <i>Ferrimonas</i>          | <i>balearica</i>          | 3781 | 446  | 1571 | 814  | 950  |
| UP000006691 | 1002809 | <i>Solibacillus</i>        | <i>silvestris</i>         | 3812 | 604  | 1470 | 714  | 1024 |
| UP000006697 | 204773  | <i>Herminiimonas</i>       | <i>arsenicocydans</i>     | 3272 | 496  | 1365 | 634  | 777  |
| UP000006728 | 405948  | <i>Saccharopolyspora</i>   | <i>erythraea</i>          | 7154 | 1197 | 2666 | 1505 | 1786 |
| UP000006746 | 1207063 | <i>Oceanibaculum</i>       | <i>indicum</i>            | 3754 | 423  | 1558 | 774  | 999  |
| UP000006755 | 745411  | <i>Gallaecimonas</i>       | <i>xiamenensis</i>        | 3798 | 515  | 1557 | 782  | 944  |
| UP000006762 | 1208323 | <i>Celeribacter</i>        | <i>baekdonensis</i>       | 4198 | 540  | 1807 | 881  | 970  |
| UP000006765 | 1231392 | <i>Oceaniovalibus</i>      | <i>guishaninsula</i>      | 2840 | 370  | 1290 | 544  | 636  |
| UP000006791 | 981222  | <i>Chloracidobacterium</i> | <i>thermophilum</i>       | 3053 | 576  | 1065 | 524  | 888  |
| UP000006793 | 667014  | <i>Thermodesulfator</i>    | <i>indicus</i>            | 2184 | 237  | 879  | 466  | 602  |
| UP000006803 | 696747  | <i>Arthrospira</i>         | <i>platensis</i>          | 6009 | 1982 | 1989 | 724  | 1314 |
| UP000006811 | 261317  | <i>Buchnera</i>            | <i>aphidicola</i>         | 359  | 6    | 170  | 90   | 93   |
| UP000006821 | 243233  | <i>Methylococcus</i>       | <i>capsulatus</i>         | 2925 | 455  | 1218 | 533  | 719  |
| UP000006833 | 398580  | <i>Dinoroseobacter</i>     | <i>shibae</i>             | 4086 | 539  | 1820 | 800  | 927  |
| UP000006851 | 700015  | <i>Coriobacterium</i>      | <i>glomerans</i>          | 1768 | 220  | 715  | 387  | 446  |
| UP000006859 | 198628  | <i>Dickeya</i>             | <i>dadantii</i>           | 4532 | 623  | 1832 | 907  | 1170 |
| UP000006860 | 756272  | <i>Rubinisphaera</i>       | <i>brasiliensis</i>       | 4710 | 1220 | 1510 | 879  | 1101 |
| UP000006866 | 572479  | <i>Halanaerobium</i>       | <i>praevalens</i>         | 2055 | 163  | 839  | 417  | 636  |
| UP000006871 | 880591  | <i>Ketogulonicigenium</i>  | <i>vulgare</i>            | 3209 | 448  | 1456 | 614  | 691  |
| UP000006872 | 701347  | <i>Enterobacter</i>        | <i>lignolyticus</i>       | 4393 | 254  | 1988 | 998  | 1153 |
| UP000006875 | 572544  | <i>Ilyobacter</i>          | <i>polytropus</i>         | 2859 | 417  | 1096 | 577  | 769  |
| UP000006908 | 1005058 | <i>Gallibacterium</i>      | <i>anatis</i>             | 2482 | 272  | 1066 | 473  | 671  |
| UP000007013 | 452637  | <i>Opitutus</i>            | <i>terrae</i>             | 4588 | 906  | 1640 | 828  | 1214 |
| UP000007029 | 375451  | <i>Roseobacter</i>         | <i>denitrificans</i>      | 4118 | 656  | 1701 | 814  | 947  |
| UP000007030 | 869210  | <i>Marinithermus</i>       | <i>hydrothermalis</i>     | 2194 | 287  | 841  | 439  | 627  |
| UP000007039 | 768670  | <i>Calditerrivibrio</i>    | <i>nitroreducens</i>      | 2089 | 219  | 827  | 443  | 600  |
| UP000007053 | 264732  | <i>Moorella</i>            | <i>thermoacetica</i>      | 2451 | 239  | 998  | 488  | 726  |
| UP000007058 | 342108  | <i>Magnetospirillum</i>    | <i>magneticum</i>         | 4514 | 1002 | 1665 | 767  | 1080 |
| UP000007074 | 399741  | <i>Serratia</i>            | <i>proteamaculans</i>     | 4930 | 310  | 2163 | 1112 | 1345 |
| UP000007076 | 452652  | <i>Kitasatospora</i>       | <i>setae</i>              | 7443 | 1611 | 2674 | 1375 | 1783 |
| UP000007102 | 868864  | <i>Desulfurobacterium</i>  | <i>thermolithotrophum</i> | 1496 | 124  | 608  | 324  | 440  |
| UP000007127 | 1123366 | <i>Thalassospira</i>       | <i>xiamenensis</i>        | 4340 | 612  | 1749 | 859  | 1120 |
| UP000007150 | 690566  | <i>Sphingobium</i>         | <i>chlorophenolicum</i>   | 4062 | 559  | 1621 | 879  | 1003 |
| UP000007161 | 443254  | <i>Marinitoga</i>          | <i>piezophila</i>         | 2044 | 312  | 744  | 438  | 550  |
| UP000007177 | 931626  | <i>Acetobacterium</i>      | <i>woodii</i>             | 3445 | 419  | 1247 | 709  | 1070 |
| UP000007347 | 651182  | <i>Desulfobacula</i>       | <i>toluolica</i>          | 4189 | 621  | 1539 | 827  | 1202 |
| UP000007364 | 555500  | <i>Galbibacter</i>         | <i>marinus</i>            | 3099 | 495  | 1176 | 630  | 798  |
| UP000007394 | 945713  | <i>Ignavibacterium</i>     | <i>album</i>              | 3169 | 602  | 1152 | 569  | 846  |

|             |         |                         |                        |      |      |      |      |      |
|-------------|---------|-------------------------|------------------------|------|------|------|------|------|
| UP000007397 | 866895  | <i>Halobacillus</i>     | <i>halophilus</i>      | 4100 | 798  | 1519 | 731  | 1052 |
| UP000007435 | 649349  | <i>Leadbetterella</i>   | <i>byssophila</i>      | 3429 | 610  | 1267 | 672  | 880  |
| UP000007460 | 488538  | <i>Puniceispirillum</i> | <i>marinum</i>         | 2545 | 339  | 1099 | 504  | 603  |
| UP000007463 | 755732  | <i>Fluviicola</i>       | <i>taffensis</i>       | 4016 | 1215 | 1316 | 635  | 850  |
| UP000007468 | 546269  | <i>Filifactor</i>       | <i>alocis</i>          | 1616 | 276  | 629  | 311  | 400  |
| UP000007472 | 937774  | <i>Taylorella</i>       | <i>equigenitalis</i>   | 1556 | 185  | 682  | 283  | 406  |
| UP000007487 | 867900  | <i>Cellulophaga</i>     | <i>lytica</i>          | 3281 | 634  | 1206 | 592  | 849  |
| UP000007488 | 645991  | <i>Syntrophobotulus</i> | <i>glycolicus</i>      | 3105 | 471  | 1177 | 577  | 880  |
| UP000007517 | 1146883 | <i>Blastococcus</i>     | <i>saxobsidens</i>     | 4791 | 1025 | 1786 | 869  | 1111 |
| UP000007519 | 984262  | <i>Saprospira</i>       | <i>grandis</i>         | 4218 | 1867 | 1122 | 535  | 694  |
| UP000007587 | 1144275 | <i>Corallococcus</i>    | <i>coralloides</i>     | 8019 | 2086 | 2602 | 1314 | 2017 |
| UP000007590 | 929556  | <i>Solitalea</i>        | <i>canadensis</i>      | 4304 | 926  | 1492 | 769  | 1117 |
| UP000007652 | 857293  | <i>Caloramator</i>      | <i>australicus</i>     | 2679 | 438  | 1064 | 476  | 701  |
| UP000007719 | 515635  | <i>Dictyoglomus</i>     | <i>turgidum</i>        | 1743 | 167  | 695  | 355  | 526  |
| UP000007730 | 504832  | <i>Oligotropha</i>      | <i>carboxidovorans</i> | 3624 | 558  | 1562 | 660  | 844  |
| UP000007809 | 675635  | <i>Pseudonocardia</i>   | <i>dioxanivorans</i>   | 6620 | 1111 | 2476 | 1376 | 1657 |
| UP000007880 | 926550  | <i>Caldilinea</i>       | <i>aerophila</i>       | 4097 | 591  | 1537 | 789  | 1180 |
| UP000007881 | 1142394 | <i>Phycisphaera</i>     | <i>mikurensis</i>      | 3269 | 842  | 1184 | 594  | 649  |
| UP000007882 | 512565  | <i>Actinoplanes</i>     | <i>missouriensis</i>   | 8113 | 1828 | 2734 | 1491 | 2060 |
| UP000007883 | 983917  | <i>Rubrivivax</i>       | <i>gelatinosus</i>     | 4686 | 619  | 1861 | 958  | 1248 |
| UP000007938 | 596154  | <i>Alicyclophilus</i>   | <i>denitrificans</i>   | 4620 | 467  | 1969 | 1012 | 1172 |
| UP000007944 | 650150  | <i>Erysipelothrix</i>   | <i>rhusiopathiae</i>   | 1679 | 273  | 628  | 314  | 464  |
| UP000007947 | 1032480 | <i>Microlumatus</i>     | <i>phosphovorans</i>   | 5305 | 1053 | 2004 | 972  | 1276 |
| UP000007962 | 471853  | <i>Beutenbergia</i>     | <i>cavernae</i>        | 4195 | 572  | 1724 | 825  | 1074 |
| UP000007966 | 218491  | <i>Pectobacterium</i>   | <i>atrosepticum</i>    | 4459 | 469  | 1875 | 966  | 1149 |
| UP000007967 | 479435  | <i>Kribbella</i>        | <i>flavida</i>         | 6940 | 1197 | 2528 | 1293 | 1922 |
| UP000007968 | 479436  | <i>Veillonella</i>      | <i>parvula</i>         | 1843 | 236  | 750  | 366  | 491  |
| UP000008080 | 264462  | <i>Bdellovibrio</i>     | <i>bacteriovorus</i>   | 3583 | 1043 | 1220 | 613  | 707  |
| UP000008130 | 991905  | <i>Polymorphum</i>      | <i>gilvum</i>          | 4354 | 555  | 1890 | 838  | 1071 |
| UP000008139 | 760142  | <i>Hippea</i>           | <i>maritima</i>        | 1653 | 151  | 696  | 331  | 475  |
| UP000008148 | 290338  | <i>Citrobacter</i>      | <i>koseri</i>          | 5019 | 988  | 1946 | 960  | 1125 |
| UP000008178 | 585394  | <i>Roseburia</i>        | <i>hominis</i>         | 3351 | 629  | 1253 | 606  | 863  |
| UP000008183 | 243274  | <i>Thermotoga</i>       | <i>maritima</i>        | 1852 | 210  | 724  | 370  | 548  |
| UP000008221 | 351607  | <i>Acidothermus</i>     | <i>cellulolyticus</i>  | 2157 | 255  | 889  | 426  | 587  |
| UP000008229 | 469383  | <i>Conexibacter</i>     | <i>woesei</i>          | 5912 | 939  | 2095 | 1268 | 1610 |
| UP000008234 | 699246  | <i>Mageeibacillus</i>   | <i>indolicus</i>       | 1566 | 311  | 572  | 294  | 389  |
| UP000008289 | 243164  | <i>Dehalococcoides</i>  | <i>mccartyi</i>        | 1502 | 303  | 527  | 277  | 395  |
| UP000008291 | 292415  | <i>Thiobacillus</i>     | <i>denitrificans</i>   | 2826 | 354  | 1185 | 576  | 711  |
| UP000008308 | 263358  | <i>Verrucosispora</i>   | <i>maris</i>           | 5998 | 1264 | 2171 | 1058 | 1505 |
| UP000008332 | 338969  | <i>Rhodoferax</i>       | <i>ferrireducens</i>   | 4401 | 530  | 1773 | 917  | 1181 |
| UP000008366 | 1184609 | <i>Kineosphaera</i>     | <i>limosa</i>          | 4422 | 764  | 1773 | 852  | 1033 |
| UP000008385 | 365046  | <i>Ramlibacter</i>      | <i>tataouinensis</i>   | 3880 | 442  | 1652 | 796  | 990  |
| UP000008392 | 1005048 | <i>Collimonas</i>       | <i>fungivorans</i>     | 4429 | 508  | 1789 | 972  | 1160 |
| UP000008456 | 940190  | <i>Melissococcus</i>    | <i>plutonius</i>       | 1876 | 303  | 786  | 339  | 448  |

|             |         |                          |                         |      |      |      |      |      |
|-------------|---------|--------------------------|-------------------------|------|------|------|------|------|
| UP000008457 | 697281  | <i>Mahella</i>           | <i>australiensis</i>    | 2858 | 439  | 1076 | 537  | 806  |
| UP000008461 | 760192  | <i>Haliscomenobacter</i> | <i>hydrossis</i>        | 6704 | 1646 | 2316 | 1155 | 1587 |
| UP000008467 | 642492  | <i>Cellulosilyticum</i>  | <i>lentocellum</i>      | 4150 | 812  | 1475 | 810  | 1053 |
| UP000008495 | 1184607 | <i>Austwickia</i>        | <i>cheloniae</i>        | 3048 | 493  | 1213 | 642  | 700  |
| UP000008514 | 313595  | <i>Psychroflexus</i>     | <i>torquis</i>          | 3457 | 847  | 1209 | 602  | 799  |
| UP000008520 | 420890  | <i>Lactococcus</i>       | <i>garvieae</i>         | 1938 | 297  | 790  | 348  | 503  |
| UP000008543 | 228400  | <i>Histophilus</i>       | <i>somni</i>            | 1971 | 215  | 897  | 370  | 489  |
| UP000008544 | 477974  | <i>Desulforudis</i>      | <i>audaxviator</i>      | 2136 | 272  | 888  | 408  | 568  |
| UP000008550 | 498761  | <i>Heliobacterium</i>    | <i>modesticaldum</i>    | 2922 | 701  | 993  | 517  | 713  |
| UP000008558 | 441768  | <i>Acholeplasma</i>      | <i>laidlawii</i>        | 1380 | 248  | 525  | 246  | 361  |
| UP000008561 | 96561   | <i>Desulfococcus</i>     | <i>oleovorans</i>       | 3255 | 482  | 1230 | 604  | 939  |
| UP000008631 | 575540  | <i>Isosphaera</i>        | <i>pallida</i>          | 3721 | 901  | 1235 | 660  | 925  |
| UP000008633 | 749222  | <i>Nitratifractor</i>    | <i>salsuginis</i>       | 2076 | 347  | 868  | 376  | 485  |
| UP000008641 | 865938  | <i>Weeksella</i>         | <i>virosa</i>           | 2045 | 400  | 759  | 388  | 498  |
| UP000008674 | 309807  | <i>Salinibacter</i>      | <i>ruber</i>            | 2812 | 473  | 1032 | 554  | 753  |
| UP000008707 | 768066  | <i>Halomonas</i>         | <i>elongata</i>         | 3469 | 319  | 1585 | 795  | 922  |
| UP000008718 | 694427  | <i>Paludibacter</i>      | <i>propionicingenes</i> | 3020 | 561  | 1114 | 553  | 792  |
| UP000008720 | 643867  | <i>Marivirga</i>         | <i>tractuosa</i>        | 3748 | 814  | 1340 | 646  | 948  |
| UP000008721 | 709032  | <i>Sulfuricurvum</i>     | <i>kujijense</i>        | 2794 | 522  | 1038 | 553  | 681  |
| UP000008722 | 670487  | <i>Oceanithermus</i>     | <i>profundus</i>        | 2372 | 403  | 953  | 432  | 584  |
| UP000008798 | 717962  | <i>Coprococcus</i>       | <i>catus</i>            | 2985 | 659  | 1081 | 525  | 720  |
| UP000008801 | 717960  | <i>Faecalitalea</i>      | <i>cylindroides</i>     | 1442 | 302  | 580  | 241  | 319  |
| UP000008805 | 657308  | <i>Gordonibacter</i>     | <i>pamelaeae</i>        | 2027 | 477  | 713  | 343  | 494  |
| UP000008806 | 657316  | <i>Megamonas</i>         | <i>hypermegale</i>      | 2118 | 417  | 950  | 337  | 414  |
| UP000008838 | 378753  | <i>Kocuria</i>           | <i>rhizophila</i>       | 2352 | 313  | 951  | 476  | 612  |
| UP000008840 | 522373  | <i>Stenotrophomonas</i>  | <i>maltophilia</i>      | 4365 | 770  | 1683 | 853  | 1059 |
| UP000008850 | 1082931 | <i>Pelagibacterium</i>   | <i>halotolerans</i>     | 3875 | 539  | 1714 | 708  | 914  |
| UP000008878 | 203124  | <i>Trichodesmium</i>     | <i>erythraeum</i>       | 4342 | 949  | 1587 | 672  | 1134 |
| UP000008888 | 857087  | <i>Methylomonas</i>      | <i>methanica</i>        | 4435 | 844  | 1694 | 788  | 1109 |
| UP000008898 | 63186   | <i>Zobellia</i>          | <i>galactanivorans</i>  | 4708 | 1091 | 1602 | 848  | 1167 |
| UP000008908 | 886377  | <i>Muricauda</i>         | <i>ruestringensis</i>   | 3425 | 644  | 1316 | 611  | 854  |
| UP000008914 | 710696  | <i>Intrasporangium</i>   | <i>calvum</i>           | 3551 | 523  | 1397 | 700  | 931  |
| UP000008915 | 644966  | <i>Thermaerobacter</i>   | <i>marianensis</i>      | 2324 | 274  | 909  | 510  | 631  |
| UP000008922 | 926569  | <i>Anaerolinea</i>       | <i>thermophila</i>      | 3110 | 515  | 1145 | 561  | 889  |
| UP000008955 | 657314  | <i>Blautia</i>           | <i>obeum</i>            | 3155 | 636  | 1155 | 567  | 797  |
| UP000008957 | 651822  | <i>Fretibacterium</i>    | <i>fastidiosum</i>      | 1434 | 288  | 595  | 246  | 305  |
| UP000008960 | 649756  | <i>Anaerostipes</i>      | <i>hadrus</i>           | 2771 | 548  | 995  | 510  | 718  |
| UP000008963 | 862908  | <i>Halobacteriovorax</i> | <i>marinus</i>          | 3230 | 933  | 1147 | 532  | 618  |
| UP000009010 | 745277  | <i>Rahnella</i>          | <i>aquatilis</i>        | 4841 | 388  | 2115 | 1078 | 1260 |
| UP000009011 | 1191523 | <i>Melioribacter</i>     | <i>roseus</i>           | 2833 | 368  | 1076 | 569  | 820  |
| UP000009047 | 644282  | <i>Desulfarculus</i>     | <i>baarsii</i>          | 3268 | 464  | 1236 | 625  | 943  |
| UP000009049 | 313596  | <i>Robiginitalea</i>     | <i>biformata</i>        | 3211 | 694  | 1197 | 568  | 752  |
| UP000009073 | 595494  | <i>Tolomonas</i>         | <i>auensis</i>          | 3126 | 275  | 1281 | 673  | 897  |
| UP000009080 | 377629  | <i>Teredinibacter</i>    | <i>turnerae</i>         | 4249 | 900  | 1605 | 753  | 991  |



|             |         |                           |                        |       |      |      |      |      |
|-------------|---------|---------------------------|------------------------|-------|------|------|------|------|
| UP000009102 | 555778  | <i>Halothiobacillus</i>   | <i>neapolitanus</i>    | 2353  | 261  | 1016 | 472  | 604  |
| UP000009149 | 481448  | <i>Methylacidiphilum</i>  | <i>inferorum</i>       | 2470  | 843  | 773  | 347  | 507  |
| UP000009235 | 443218  | <i>Amycolicococcus</i>    | <i>subflavus</i>       | 4703  | 927  | 1735 | 894  | 1147 |
| UP000009236 | 743718  | <i>Isoptericola</i>       | <i>variabilis</i>      | 2879  | 377  | 1206 | 546  | 750  |
| UP000009282 | 1085623 | <i>Glaciecola</i>         | <i>nitratireducens</i> | 3653  | 622  | 1415 | 711  | 905  |
| UP000009286 | 856793  | <i>Micavibrio</i>         | <i>aeruginosavorus</i> | 2432  | 716  | 848  | 370  | 498  |
| UP000009309 | 1185876 | <i>Fibrisoma</i>          | <i>limi</i>            | 6341  | 1377 | 2179 | 1101 | 1684 |
| UP000009338 | 1141663 | <i>Providencia</i>        | <i>rettgeri</i>        | 3847  | 389  | 1666 | 819  | 973  |
| UP000009874 | 883126  | <i>Massilia</i>           | <i>timonae</i>         | 5096  | 726  | 1911 | 1091 | 1368 |
| UP000009875 | 883081  | <i>Alloiococcus</i>       | <i>otitis</i>          | 1627  | 160  | 680  | 320  | 467  |
| UP000009881 | 1238182 | <i>Caenispirillum</i>     | <i>salinarum</i>       | 4574  | 745  | 1816 | 878  | 1135 |
| UP000009888 | 883066  | <i>Actinobaculum</i>      | <i>massiliense</i>     | 1696  | 256  | 713  | 315  | 412  |
| UP000010294 | 553217  | <i>Enhydrobacter</i>      | <i>aerosaccus</i>      | 2573  | 491  | 1012 | 489  | 581  |
| UP000010366 | 1173020 | <i>Chamaesiphon</i>       | <i>minutus</i>         | 5815  | 1638 | 1979 | 833  | 1365 |
| UP000010367 | 56110   | <i>Oscillatoria</i>       | <i>acuminata</i>       | 5755  | 1398 | 2017 | 817  | 1523 |
| UP000010384 | 251229  | <i>Chroococcidiopsis</i>  | <i>thermalis</i>       | 5740  | 1142 | 2090 | 944  | 1564 |
| UP000010388 | 292564  | <i>Cyanobium</i>          | <i>gracile</i>         | 3261  | 712  | 1387 | 492  | 670  |
| UP000010472 | 1173022 | <i>Crinalium</i>          | <i>epipsammum</i>      | 4697  | 1144 | 1684 | 698  | 1171 |
| UP000010473 | 111780  | <i>Stanieria</i>          | <i>cyanosphaera</i>    | 4751  | 1019 | 1785 | 728  | 1219 |
| UP000010474 | 272123  | <i>Anabaena</i>           | <i>cylindrica</i>      | 5797  | 1485 | 2129 | 786  | 1397 |
| UP000010475 | 56107   | <i>Cylindrospermum</i>    | <i>stagnale</i>        | 6200  | 1712 | 2165 | 819  | 1504 |
| UP000010480 | 755178  | <i>Cyanobacterium</i>     | <i>aponinum</i>        | 3415  | 634  | 1370 | 587  | 824  |
| UP000010483 | 292563  | <i>Cyanobacterium</i>     | <i>stanieri</i>        | 2831  | 444  | 1151 | 508  | 728  |
| UP000010716 | 986075  | <i>Caldalkalibacillus</i> | <i>thermarum</i>       | 2969  | 409  | 1239 | 543  | 778  |
| UP000010795 | 717605  | <i>Thermobacillus</i>     | <i>composti</i>        | 3802  | 517  | 1470 | 734  | 1081 |
| UP000010796 | 926556  | <i>Echinicola</i>         | <i>vietnamensis</i>    | 4509  | 951  | 1542 | 882  | 1134 |
| UP000010798 | 886293  | <i>Singulisphaera</i>     | <i>acidiphila</i>      | 7126  | 2044 | 2139 | 1224 | 1719 |
| UP000010799 | 1215343 | <i>Liberibacter</i>       | <i>crescens</i>        | 1376  | 238  | 567  | 256  | 315  |
| UP000010802 | 1209989 | <i>Tepidanaerobacter</i>  | <i>acetatoxydans</i>   | 2640  | 350  | 1087 | 505  | 698  |
| UP000010816 | 765912  | <i>Thioflavococcus</i>    | <i>mobilis</i>         | 3528  | 561  | 1449 | 626  | 892  |
| UP000010880 | 748449  | <i>Halobacteroides</i>    | <i>halobius</i>        | 2452  | 282  | 930  | 492  | 748  |
| UP000010953 | 1239962 | <i>Mariniradius</i>       | <i>saccharolyticus</i> | 4633  | 1413 | 1572 | 707  | 941  |
| UP000011021 | 887898  | <i>Lautropia</i>          | <i>mirabilis</i>       | 2665  | 427  | 1081 | 514  | 643  |
| UP000011058 | 1166018 | <i>Fibrella</i>           | <i>aestuarina</i>      | 5627  | 1341 | 1926 | 966  | 1394 |
| UP000011135 | 1237149 | <i>Fulvivirga</i>         | <i>imtechensis</i>     | 5952  | 1774 | 1832 | 901  | 1445 |
| UP000011173 | 592029  | <i>Nonlabens</i>          | <i>dokdonensis</i>     | 3613  | 1069 | 1238 | 564  | 742  |
| UP000011201 | 927668  | <i>Pseudanabaena</i>      | <i>biceps</i>          | 4751  | 1177 | 1789 | 662  | 1123 |
| UP000011617 | 1261130 | <i>Wohlfahrtimonas</i>    | <i>chitinoclastica</i> | 2004  | 243  | 816  | 442  | 503  |
| UP000011682 | 1242864 | <i>Cystobacter</i>        | <i>fuscus</i>          | 10511 | 3330 | 3085 | 1649 | 2447 |
| UP000011704 | 1266370 | <i>Nitrospina</i>         | <i>gracilis</i>        | 2962  | 700  | 1032 | 485  | 745  |
| UP000011721 | 1167006 | <i>Desulfocapsa</i>       | <i>sulfexigens</i>     | 3514  | 574  | 1260 | 713  | 967  |
| UP000011746 | 1230341 | <i>Salimicrobium</i>      | <i>jeotgali</i>        | 2730  | 330  | 1093 | 555  | 746  |
| UP000011758 | 999415  | <i>Eggerthia</i>          | <i>catenaformis</i>    | 1874  | 316  | 714  | 358  | 486  |
| UP000011765 | 747365  | <i>Thermodesulfobium</i>  | <i>narugense</i>       | 1797  | 194  | 718  | 380  | 505  |

|             |         |                          |                          |      |      |      |      |      |
|-------------|---------|--------------------------|--------------------------|------|------|------|------|------|
| UP000011834 | 1124991 | <i>Morganella</i>        | <i>morganii</i>          | 3510 | 354  | 1573 | 735  | 848  |
| UP000011846 | 1171377 | <i>Bibersteinia</i>      | <i>trehalosi</i>         | 2244 | 244  | 956  | 481  | 563  |
| UP000011863 | 1313172 | <i>Ilumatobacter</i>     | <i>coccineus</i>         | 4290 | 747  | 1639 | 833  | 1071 |
| UP000011866 | 1298593 | <i>Thalassolituus</i>    | <i>oleivorans</i>        | 3634 | 678  | 1418 | 708  | 830  |
| UP000011910 | 1279009 | <i>Cesiribacter</i>      | <i>andamanensis</i>      | 4225 | 1017 | 1533 | 726  | 949  |
| UP000011919 | 1235279 | <i>Bhargavaea</i>        | <i>cecembensis</i>       | 3168 | 362  | 1279 | 671  | 856  |
| UP000012283 | 1308866 | <i>Gracilibacillus</i>   | <i>halophilus</i>        | 2968 | 367  | 1280 | 539  | 782  |
| UP000013167 | 1193181 | <i>Tetrasphaera</i>      | <i>elongata</i>          | 3089 | 614  | 1237 | 565  | 673  |
| UP000013232 | 1123367 | <i>Thauera</i>           | <i>linaloolentis</i>     | 3836 | 352  | 1581 | 812  | 1091 |
| UP000013378 | 1304284 | <i>Caldisalibacter</i>   | <i>kiritimatiensis</i>   | 2681 | 472  | 970  | 507  | 732  |
| UP000013981 | 1203606 | <i>Butyricococcus</i>    | <i>pullicaeorum</i>      | 3107 | 572  | 1159 | 575  | 801  |
| UP000014012 | 1315976 | <i>Plesiomonas</i>       | <i>shigelloides</i>      | 3377 | 373  | 1427 | 717  | 860  |
| UP000014174 | 1150600 | <i>Arcticibacter</i>     | <i>svalbardensis</i>     | 4309 | 1093 | 1494 | 755  | 967  |
| UP000014216 | 1286635 | <i>Desulfotignum</i>     | <i>phosphitoxidans</i>   | 4515 | 710  | 1716 | 818  | 1271 |
| UP000014227 | 1303518 | <i>Chthonomonas</i>      | <i>calidirosea</i>       | 2809 | 546  | 937  | 549  | 777  |
| UP000014417 | 883161  | <i>Propionimicrobium</i> | <i>lymphophilum</i>      | 2076 | 392  | 815  | 380  | 489  |
| UP000014461 | 1331007 | <i>Agarivorans</i>       | <i>albus</i>             | 4397 | 694  | 1763 | 851  | 1089 |
| UP000014822 | 1330036 | <i>Osedax</i>            | <i>symbiont</i>          | 4383 | 1186 | 1556 | 758  | 883  |
| UP000014827 | 1112230 | <i>Chlamydia</i>         | <i>psittaci</i>          | 2863 | 1779 | 822  | 160  | 102  |
| UP000014923 | 941824  | <i>Thermobrachium</i>    | <i>celere</i>            | 2370 | 291  | 941  | 423  | 715  |
| UP000014962 | 641526  | <i>Winogradskyella</i>   | <i>psychrotolerans</i>   | 4023 | 1027 | 1500 | 659  | 837  |
| UP000015346 | 1123069 | <i>Rubellimicrobium</i>  | <i>thermophilum</i>      | 3244 | 523  | 1482 | 605  | 634  |
| UP000015347 | 1123237 | <i>Salipiger</i>         | <i>mucosus</i>           | 5583 | 1206 | 2264 | 1017 | 1096 |
| UP000015351 | 1123360 | <i>Litoreibacter</i>     | <i>arenae</i>            | 3640 | 582  | 1576 | 691  | 788  |
| UP000015559 | 1163617 | <i>Sulfuricella</i>      | <i>denitrificans</i>     | 3071 | 412  | 1213 | 644  | 802  |
| UP000015924 | 1384484 | <i>Adlercreutzia</i>     | <i>equolifaciens</i>     | 2281 | 370  | 849  | 454  | 608  |
| UP000016057 | 1234409 | <i>Catelicoccus</i>      | <i>marimammalium</i>     | 1196 | 143  | 490  | 235  | 328  |
| UP000016160 | 1347342 | <i>Formosa</i>           | <i>agariphila</i>        | 3557 | 691  | 1289 | 679  | 898  |
| UP000016368 | 887062  | <i>Hylemonella</i>       | <i>gracilis</i>          | 3342 | 295  | 1472 | 690  | 885  |
| UP000016462 | 1330458 | <i>Agrococcus</i>        | <i>pavilionensis</i>     | 2776 | 503  | 1055 | 518  | 700  |
| UP000016519 | 1321816 | <i>Alloscardovia</i>     | <i>omnicolens</i>        | 1649 | 371  | 626  | 293  | 359  |
| UP000016843 | 1123057 | <i>Rhodonellum</i>       | <i>psychrophilum</i>     | 4904 | 1563 | 1576 | 739  | 1026 |
| UP000016901 | 891974  | <i>Plautia</i>           | <i>stali</i>             | 5007 | 860  | 2456 | 876  | 815  |
| UP000016960 | 582515  | <i>Rubidibacter</i>      | <i>lacunae</i>           | 3455 | 908  | 1252 | 548  | 747  |
| UP000017081 | 1319815 | <i>Cetobacterium</i>     | <i>somerae</i>           | 2974 | 467  | 1168 | 550  | 789  |
| UP000017148 | 1313304 | <i>Chitinivibrio</i>     | <i>alkaliphilus</i>      | 2304 | 482  | 846  | 451  | 525  |
| UP000017429 | 1379858 | <i>Mucispirillum</i>     | <i>schaedleri</i>        | 2091 | 406  | 777  | 396  | 512  |
| UP000017747 | 994573  | <i>Youngiibacter</i>     | <i>fragilis</i>          | 3736 | 585  | 1457 | 764  | 923  |
| UP000017813 | 641147  | <i>Simonsiella</i>       | <i>muelleri</i>          | 2220 | 464  | 908  | 381  | 467  |
| UP000017819 | 631454  | <i>Lutibaculum</i>       | <i>baratangense</i>      | 4164 | 588  | 1758 | 787  | 1031 |
| UP000017842 | 1116472 | <i>Methyloglobulus</i>   | <i>morosus</i>           | 3737 | 743  | 1520 | 636  | 833  |
| UP000017881 | 1260251 | <i>Spiribacter</i>       | <i>salinus</i>           | 1684 | 96   | 773  | 336  | 479  |
| UP000017958 | 1263095 | <i>Paraprevotella</i>    | <i>clara</i>             | 2847 | 592  | 1042 | 533  | 680  |
| UP000018034 | 1263099 | <i>Parasutterella</i>    | <i>excrementihominis</i> | 2228 | 354  | 879  | 450  | 545  |

|             |         |                           |                            |      |      |      |      |      |
|-------------|---------|---------------------------|----------------------------|------|------|------|------|------|
| UP000018109 | 1263073 | <i>Dorea</i>              | <i>formicigenerans</i>     | 2461 | 352  | 983  | 485  | 641  |
| UP000018126 | 1408226 | <i>Vagococcus</i>         | <i>lutrae</i>              | 1736 | 148  | 700  | 360  | 528  |
| UP000018227 | 592026  | <i>Catonella</i>          | <i>morbi</i>               | 3288 | 708  | 1239 | 547  | 794  |
| UP000018296 | 1395513 | <i>Sporolactobacillus</i> | <i>laevolacticus</i>       | 3497 | 556  | 1351 | 657  | 933  |
| UP000018435 | 1003237 | <i>Nitrospirillum</i>     | <i>amazonense</i>          | 3357 | 817  | 1091 | 648  | 801  |
| UP000018458 | 762983  | <i>Succinatimonas</i>     | <i>hippei</i>              | 2169 | 379  | 877  | 405  | 508  |
| UP000018466 | 796942  | <i>Stomatobaculum</i>     | <i>longum</i>              | 2070 | 323  | 829  | 383  | 535  |
| UP000018680 | 1307761 | <i>Salinispira</i>        | <i>pacifica</i>            | 3350 | 832  | 1204 | 576  | 738  |
| UP000018766 | 1414851 | <i>Pelistega</i>          | <i>indica</i>              | 2121 | 366  | 904  | 375  | 476  |
| UP000018780 | 999552  | <i>Leisingera</i>         | <i>methylohalidivorans</i> | 4508 | 877  | 1829 | 851  | 951  |
| UP000018840 | 1403945 | <i>Negativicoccus</i>     | <i>succinicivorans</i>     | 1679 | 345  | 684  | 286  | 364  |
| UP000018843 | 1403948 | <i>Varibaculum</i>        | <i>camabriense</i>         | 2003 | 418  | 813  | 331  | 441  |
| UP000018850 | 1286632 | <i>Zhouia</i>             | <i>amylytica</i>           | 3362 | 634  | 1181 | 642  | 896  |
| UP000018901 | 880074  | <i>Barnesiella</i>        | <i>viscericola</i>         | 2487 | 448  | 888  | 505  | 646  |
| UP000019023 | 694431  | <i>Desulfurella</i>       | <i>acetivorans</i>         | 1825 | 186  | 732  | 378  | 529  |
| UP000019030 | 1441930 | <i>Chania</i>             | <i>multitudinisentens</i>  | 4521 | 408  | 1968 | 994  | 1151 |
| UP000019050 | 592010  | <i>Abiotrophia</i>        | <i>defectiva</i>           | 1943 | 329  | 768  | 366  | 480  |
| UP000019062 | 1227360 | <i>Viridibacillus</i>     | <i>arenosi</i>             | 4296 | 649  | 1681 | 809  | 1157 |
| UP000019063 | 1317118 | <i>Roseivivax</i>         | <i>atlanticus</i>          | 4264 | 655  | 1845 | 804  | 960  |
| UP000019112 | 1399147 | <i>Holospira</i>          | <i>obtusa</i>              | 1116 | 388  | 394  | 137  | 197  |
| UP000019151 | 861299  | <i>Gemmatirosa</i>        | <i>kalamazoonesis</i>      | 6261 | 1397 | 2113 | 1126 | 1625 |
| UP000019190 | 1432561 | <i>Klebsiella</i>         | <i>pneumoniae</i>          | 5313 | 1233 | 2505 | 823  | 752  |
| UP000019205 | 314285  | <i>Congregibacter</i>     | <i>litoralis</i>           | 3868 | 611  | 1514 | 801  | 942  |
| UP000019225 | 1449976 | <i>Kutzneria</i>          | <i>albida</i>              | 8775 | 1664 | 3119 | 1759 | 2233 |
| UP000019242 | 1121126 | <i>Brochothrix</i>        | <i>thermosphacta</i>       | 2589 | 404  | 1136 | 453  | 596  |
| UP000019276 | 1328313 | <i>Catenovulum</i>        | <i>agarivorans</i>         | 3835 | 538  | 1579 | 772  | 946  |
| UP000019277 | 909613  | <i>Actinokineospora</i>   | <i>spheciospongiae</i>     | 6610 | 1545 | 2281 | 1238 | 1546 |
| UP000019325 | 313624  | <i>Nodularia</i>          | <i>spumigena</i>           | 5211 | 1659 | 1730 | 697  | 1125 |
| UP000019402 | 869213  | <i>Saccharicrinis</i>     | <i>fermentans</i>          | 4663 | 992  | 1700 | 852  | 1119 |
| UP000019423 | 1227739 | <i>Hymenobacter</i>       | <i>swuensis</i>            | 4612 | 1232 | 1525 | 787  | 1068 |
| UP000019464 | 1229521 | <i>Nitrincola</i>         | <i>nitratireducens</i>     | 4019 | 473  | 1764 | 811  | 971  |
| UP000019485 | 479430  | <i>Actinospica</i>        | <i>robiniae</i>            | 191  | 46   | 62   | 36   | 47   |
| UP000019486 | 1385369 | <i>Skermanella</i>        | <i>stibiirensistens</i>    | 7269 | 1248 | 2781 | 1383 | 1857 |
| UP000019593 | 1294273 | <i>Roseibacterium</i>     | <i>elongatum</i>           | 3433 | 607  | 1442 | 630  | 754  |
| UP000019656 | 1196095 | <i>Gilliamella</i>        | <i>apicola</i>             | 2784 | 469  | 1097 | 533  | 685  |
| UP000019675 | 1145276 | <i>Lysinibacillus</i>     | <i>varians</i>             | 4504 | 918  | 1647 | 803  | 1136 |
| UP000019678 | 1192034 | <i>Chondromyces</i>       | <i>apiculatus</i>          | 9037 | 3202 | 2534 | 1346 | 1955 |
| UP000019681 | 1403537 | <i>Fervidicella</i>       | <i>metallireducens</i>     | 2800 | 525  | 1068 | 518  | 689  |
| UP000019753 | 948458  | <i>Actinotalea</i>        | <i>ferrariae</i>           | 3558 | 678  | 1398 | 650  | 832  |
| UP000019755 | 1292022 | <i>Curtobacterium</i>     | <i>flaccumfaciens</i>      | 3386 | 600  | 1341 | 598  | 847  |
| UP000019760 | 1231351 | <i>Acidomonas</i>         | <i>methanolica</i>         | 3270 | 571  | 1395 | 592  | 712  |
| UP000019767 | 1164990 | <i>Richelia</i>           | <i>intracellularis</i>     | 7610 | 3754 | 2459 | 694  | 703  |
| UP000019771 | 1661    | <i>Trueperella</i>        | <i>pyogenes</i>            | 1984 | 282  | 834  | 374  | 494  |
| UP000019805 | 1437824 | <i>Castellaniella</i>     | <i>defragrans</i>          | 3575 | 417  | 1482 | 724  | 952  |

|             |         |                            |                         |      |      |      |      |      |
|-------------|---------|----------------------------|-------------------------|------|------|------|------|------|
| UP000019849 | 69279   | <i>Aquamicrobium</i>       | <i>defluvii</i>         | 4454 | 610  | 1925 | 842  | 1077 |
| UP000021053 | 927661  | <i>Cryptosporangium</i>    | <i>arvum</i>            | 4033 | 708  | 1438 | 813  | 1074 |
| UP000023044 | 866499  | <i>Cloacibacillus</i>      | <i>evryensis</i>        | 1082 | 128  | 424  | 259  | 271  |
| UP000023435 | 1444315 | <i>Lysobacter</i>          | <i>capsici</i>          | 5139 | 1475 | 1767 | 928  | 1106 |
| UP000023541 | 1317122 | <i>Aquimarina</i>          | <i>atlantica</i>        | 4786 | 1077 | 1671 | 867  | 1171 |
| UP000023772 | 1168034 | <i>Draconibacterium</i>    | <i>orientale</i>        | 3940 | 683  | 1432 | 820  | 1005 |
| UP000024387 | 1379159 | <i>Dyella</i>              | <i>jiangningensis</i>   | 4342 | 645  | 1643 | 911  | 1143 |
| UP000024836 | 1461693 | <i>Actibacterium</i>       | <i>atlanticum</i>       | 3126 | 379  | 1366 | 638  | 743  |
| UP000026714 | 1286631 | <i>Sphaerotilus</i>        | <i>natans</i>           | 4177 | 672  | 1671 | 877  | 957  |
| UP000027284 | 1312852 | <i>Thermoanaerobaculum</i> | <i>aquaticum</i>        | 2252 | 346  | 826  | 403  | 677  |
| UP000027337 | 83219   | <i>Sulfitobacter</i>       | <i>mediterraneus</i>    | 3649 | 438  | 1602 | 728  | 881  |
| UP000027341 | 28885   | <i>Hydrogenovibrio</i>     | <i>marinus</i>          | 2330 | 340  | 933  | 484  | 573  |
| UP000027395 | 388467  | <i>Planktothrix</i>        | <i>agardhii</i>         | 4186 | 841  | 1680 | 631  | 1034 |
| UP000027583 | 1382230 | <i>Asaia</i>               | <i>platycodi</i>        | 3273 | 782  | 1224 | 576  | 691  |
| UP000027604 | 1349767 | <i>Janthinobacterium</i>   | <i>agaricidamnosum</i>  | 5488 | 1139 | 1927 | 1121 | 1301 |
| UP000027616 | 1433126 | <i>Mucinivorans</i>        | <i>hirudinis</i>        | 2816 | 739  | 1004 | 465  | 608  |
| UP000027647 | 1044    | <i>Erythrobacter</i>       | <i>longus</i>           | 3219 | 565  | 1330 | 621  | 703  |
| UP000027665 | 2754    | <i>Synergistes</i>         | <i>jonesii</i>          | 2481 | 358  | 1033 | 510  | 580  |
| UP000027725 | 1185766 | <i>Thioclava</i>           | <i>dalianensis</i>      | 4007 | 570  | 1731 | 806  | 900  |
| UP000027821 | 1048983 | <i>Anditalea</i>           | <i>andensis</i>         | 4341 | 877  | 1566 | 795  | 1103 |
| UP000027931 | 1157490 | <i>Tumebacillus</i>        | <i>flagellatus</i>      | 4452 | 785  | 1624 | 814  | 1229 |
| UP000027980 | 586416  | <i>Terribacillus</i>       | <i>aidingensis</i>      | 3230 | 310  | 1356 | 619  | 945  |
| UP000027982 | 661478  | <i>Fimbriimonas</i>        | <i>ginsengisoli</i>     | 4817 | 1445 | 1591 | 733  | 1048 |
| UP000027986 | 1274    | <i>Dermacoccus</i>         | <i>nishinomiyaensis</i> | 2255 | 396  | 870  | 422  | 567  |
| UP000027997 | 305900  | <i>Endozoicomonas</i>      | <i>elysicola</i>        | 4147 | 864  | 1509 | 801  | 973  |
| UP000028323 | 1443103 | <i>Snodgrassella</i>       | <i>alvi</i>             | 1571 | 370  | 621  | 280  | 300  |
| UP000028521 | 1197477 | <i>Mangrovimonas</i>       | <i>yunxiaonensis</i>    | 2307 | 388  | 896  | 410  | 613  |
| UP000028602 | 1005995 | <i>Tatumella</i>           | <i>ptyseos</i>          | 3337 | 394  | 1450 | 691  | 802  |
| UP000028624 | 1005999 | <i>Leminorella</i>         | <i>grimontii</i>        | 3756 | 449  | 1615 | 785  | 907  |
| UP000028680 | 666509  | <i>Planktomarina</i>       | <i>temperata</i>        | 3024 | 306  | 1303 | 674  | 741  |
| UP000028702 | 1333998 | <i>Tepidicaulis</i>        | <i>marinus</i>          | 3398 | 474  | 1409 | 644  | 871  |
| UP000028720 | 1453500 | <i>Schleiferia</i>         | <i>thermophila</i>      | 2301 | 548  | 815  | 379  | 559  |
| UP000028725 | 394096  | <i>Hyalangium</i>          | <i>minutum</i>          | 8967 | 2568 | 2706 | 1436 | 2257 |
| UP000028824 | 1105367 | <i>Paenirhodobacter</i>    | <i>enshiensis</i>       | 2781 | 311  | 1230 | 569  | 671  |
| UP000028826 | 195105  | <i>Haematobacter</i>       | <i>massiliensis</i>     | 3806 | 469  | 1656 | 786  | 895  |
| UP000028933 | 1338011 | <i>Elizabethkingia</i>     | <i>anophelis</i>        | 4061 | 1006 | 1426 | 728  | 901  |
| UP000028945 | 1072685 | <i>Basilea</i>             | <i>psittacipulmonis</i> | 1452 | 130  | 645  | 290  | 387  |
| UP000028981 | 46914   | <i>Devosia</i>             | <i>riboflavina</i>      | 4273 | 608  | 1820 | 835  | 1010 |
| UP000029085 | 1121014 | <i>Arenimonas</i>          | <i>donghaensis</i>      | 2685 | 323  | 1112 | 522  | 728  |
| UP000029273 | 160660  | <i>Acidihalobacter</i>     | <i>prosperus</i>        | 2685 | 479  | 1274 | 619  | 816  |
| UP000029516 | 158822  | <i>Cedecea</i>             | <i>neteri</i>           | 4399 | 296  | 1893 | 1030 | 1180 |
| UP000029541 | 1238    | <i>Piscirickettsia</i>     | <i>salmonis</i>         | 2947 | 768  | 1022 | 512  | 645  |
| UP000029622 | 1156417 | <i>Caloranaerobacter</i>   | <i>azorensis</i>        | 2148 | 318  | 816  | 398  | 616  |
| UP000029629 | 1401065 | <i>Oligella</i>            | <i>urethralis</i>       | 2118 | 233  | 910  | 401  | 574  |

|             |         |                           |                            |       |      |      |      |      |
|-------------|---------|---------------------------|----------------------------|-------|------|------|------|------|
| UP000029640 | 1265313 | <i>Pseudohalaea</i>       | <i>rubra</i>               | 2860  | 344  | 1171 | 619  | 726  |
| UP000029644 | 221126  | <i>Algibacter</i>         | <i>lectus</i>              | 4609  | 1183 | 1723 | 759  | 944  |
| UP000029708 | 1543381 | <i>Oleigrimonas</i>       | <i>solis</i>               | 2676  | 354  | 1032 | 567  | 723  |
| UP000029736 | 1524460 | <i>Phaeodactylibacter</i> | <i>xiamenensis</i>         | 5064  | 1460 | 1645 | 834  | 1125 |
| UP000029737 | 414996  | <i>Actinopolyspora</i>    | <i>erythraea</i>           | 3972  | 769  | 1569 | 717  | 917  |
| UP000029738 | 1479485 | <i>Tolythrix</i>          | <i>bouteillei</i>          | 7755  | 2040 | 2608 | 1092 | 2009 |
| UP000029864 | 1001240 | <i>Cryobacterium</i>      | <i>roopkundense</i>        | 3249  | 545  | 1329 | 646  | 729  |
| UP000029986 | 1453496 | <i>Hafnia</i>             | <i>alvei</i>               | 4059  | 278  | 1860 | 908  | 1013 |
| UP000029990 | 1385518 | <i>Knoellia</i>           | <i>flava</i>               | 3373  | 578  | 1323 | 625  | 847  |
| UP000029995 | 1398085 | <i>Inquilinus</i>         | <i>limosus</i>             | 6228  | 934  | 2658 | 1224 | 1412 |
| UP000030004 | 1461694 | <i>Pseudooceanicola</i>   | <i>atlanticus</i>          | 4202  | 522  | 1817 | 854  | 1009 |
| UP000030147 | 1385514 | <i>Pontibacillus</i>      | <i>yanchengensis</i>       | 3964  | 604  | 1553 | 744  | 1063 |
| UP000030170 | 1497020 | <i>Neosynechococcus</i>   | <i>sphagnicola</i>         | 2723  | 652  | 1098 | 404  | 569  |
| UP000030184 | 504487  | <i>Jejuia</i>             | <i>pallidilutea</i>        | 3326  | 685  | 1236 | 580  | 825  |
| UP000030185 | 153721  | <i>Sporocytophaga</i>     | <i>myxococcoides</i>       | 5042  | 1457 | 1682 | 774  | 1129 |
| UP000030300 | 2045    | <i>Nocardioides</i>       | <i>simplex</i>             | 5426  | 1081 | 1982 | 1024 | 1339 |
| UP000030380 | 505317  | <i>Chelonobacter</i>      | <i>oris</i>                | 2284  | 109  | 1006 | 533  | 636  |
| UP000030826 | 370622  | <i>Aureimonas</i>         | <i>altamirensis</i>        | 3519  | 369  | 1576 | 695  | 879  |
| UP000030856 | 2340    | <i>Solemya</i>            | <i>velum</i>               | 2657  | 431  | 1048 | 503  | 675  |
| UP000030901 | 1267021 | <i>Frischella</i>         | <i>perrara</i>             | 2270  | 283  | 967  | 447  | 573  |
| UP000030982 | 1338436 | <i>Sinomonas</i>          | <i>humi</i>                | 3444  | 567  | 1350 | 663  | 864  |
| UP000030988 | 1572751 | <i>Porphyrobacter</i>     | <i>mercurialis</i>         | 2758  | 416  | 1179 | 541  | 622  |
| UP000030993 | 82374   | <i>Anaerovibrio</i>       | <i>lipolyticus</i>         | 2437  | 436  | 971  | 441  | 589  |
| UP000031002 | 1348852 | <i>Mumia</i>              | <i>flava</i>               | 4037  | 557  | 1647 | 789  | 1044 |
| UP000031189 | 1577792 | <i>Terrisporobacter</i>   | <i>othiniensis</i>         | 3449  | 539  | 1290 | 670  | 950  |
| UP000031275 | 510955  | <i>Chryseobacterium</i>   | <i>solincola</i>           | 2087  | 336  | 842  | 375  | 534  |
| UP000031386 | 33033   | <i>Parvimonas</i>         | <i>micra</i>               | 1418  | 175  | 556  | 281  | 406  |
| UP000031408 | 1349421 | <i>Flaviumibacter</i>     | <i>solisilvae</i>          | 4215  | 744  | 1486 | 837  | 1148 |
| UP000031518 | 454194  | <i>Pyrinomonas</i>        | <i>methylaliphatogenes</i> | 3179  | 520  | 1073 | 576  | 1010 |
| UP000031549 | 1304833 | <i>Hassallia</i>          | <i>byssoides</i>           | 10137 | 2721 | 3492 | 1486 | 2438 |
| UP000031552 | 340071  | <i>Criblamydia</i>        | <i>sequanensis</i>         | 2418  | 673  | 824  | 392  | 529  |
| UP000031561 | 1574623 | <i>Lyngbya</i>            | <i>confervoides</i>        | 6060  | 1326 | 2486 | 985  | 1263 |
| UP000031599 | 215803  | <i>Enhygromyxa</i>        | <i>salina</i>              | 8157  | 3159 | 2287 | 1121 | 1590 |
| UP000031623 | 40754   | <i>Thioploca</i>          | <i>ingrica</i>             | 3951  | 876  | 1528 | 579  | 968  |
| UP000031631 | 1076588 | <i>Thiolapillus</i>       | <i>brandeum</i>            | 2824  | 356  | 1110 | 562  | 796  |
| UP000031637 | 1223802 | <i>Sulfuritalea</i>       | <i>hydrogenivorans</i>     | 3578  | 423  | 1468 | 718  | 969  |
| UP000031643 | 1384459 | <i>Methyloceanibacter</i> | <i>caenitepidi</i>         | 3341  | 749  | 1270 | 619  | 703  |
| UP000031675 | 183763  | <i>Streptomonospora</i>   | <i>alba</i>                | 4307  | 674  | 1720 | 799  | 1114 |
| UP000031938 | 889306  | <i>Jeotgalibacillus</i>   | <i>solis</i>               | 3938  | 740  | 1532 | 707  | 959  |
| UP000031959 | 1233231 | <i>Scytonema</i>          | <i>tolypothrichoides</i>   | 7078  | 1279 | 2012 | 872  | 1462 |
| UP000031980 | 1547597 | <i>Sanguibacteroides</i>  | <i>justesenii</i>          | 2587  | 394  | 916  | 543  | 734  |
| UP000032120 | 55969   | <i>Leucobacter</i>        | <i>komagatae</i>           | 2703  | 433  | 1066 | 543  | 661  |
| UP000032229 | 1454006 | <i>Siansivirga</i>        | <i>zeaxanthinifaciens</i>  | 2744  | 489  | 1071 | 472  | 712  |
| UP000032232 | 935700  | <i>Jannaschia</i>         | <i>aquimarina</i>          | 4049  | 740  | 1725 | 724  | 860  |

|             |         |                            |                        |      |      |      |      |      |
|-------------|---------|----------------------------|------------------------|------|------|------|------|------|
| UP000032233 | 1429043 | <i>Dethiosulfatarculus</i> | <i>sandiegensis</i>    | 5395 | 1267 | 1763 | 960  | 1398 |
| UP000032266 | 1445510 | <i>Gynuella</i>            | <i>sunshinyii</i>      | 5913 | 1759 | 1933 | 953  | 1268 |
| UP000032336 | 1121877 | <i>Ferrimicrobium</i>      | <i>acidiphilum</i>     | 2974 | 789  | 1031 | 511  | 643  |
| UP000032360 | 1280514 | <i>Acidithrix</i>          | <i>ferrooxidans</i>    | 3548 | 985  | 1274 | 606  | 683  |
| UP000032361 | 1382798 | <i>Tamlana</i>             | <i>nanhaiensis</i>     | 3029 | 486  | 1162 | 561  | 820  |
| UP000032368 | 1594576 | <i>Mastigocladus</i>       | <i>laminosus</i>       | 5930 | 1955 | 1895 | 832  | 1222 |
| UP000032414 | 451     | <i>Tatlockia</i>           | <i>micdadei</i>        | 2989 | 720  | 1061 | 511  | 697  |
| UP000032417 | 1562970 | <i>Fermentimonas</i>       | <i>caenicola</i>       | 2391 | 320  | 906  | 539  | 626  |
| UP000032438 | 80854   | <i>Moritella</i>           | <i>viscosa</i>         | 4219 | 581  | 1736 | 875  | 1027 |
| UP000032452 | 1618023 | <i>Chroococcales</i>       | <i>cyanobacterium</i>  | 4366 | 923  | 1663 | 681  | 1099 |
| UP000032503 | 110935  | <i>Agreia</i>              | <i>bicolorata</i>      | 3109 | 465  | 1253 | 593  | 798  |
| UP000032515 | 1076    | <i>Rhodopseudomonas</i>    | <i>palustris</i>       | 5580 | 846  | 2390 | 1052 | 1292 |
| UP000032530 | 575     | <i>Raoultella</i>          | <i>planticola</i>      | 2923 | 667  | 1525 | 393  | 338  |
| UP000032568 | 485447  | <i>Thalassomonas</i>       | <i>actinarum</i>       | 5460 | 1213 | 2010 | 1043 | 1194 |
| UP000032611 | 1486262 | <i>Martelevella</i>        | <i>endophytica</i>     | 4020 | 383  | 1762 | 828  | 1047 |
| UP000032668 | 1120923 | <i>Acidocella</i>          | <i>aminolytica</i>     | 3751 | 605  | 1490 | 713  | 943  |
| UP000032679 | 1231623 | <i>Tanticharoenia</i>      | <i>sakaeratensis</i>   | 3154 | 572  | 1241 | 622  | 719  |
| UP000032680 | 1231350 | <i>Acidisphaera</i>        | <i>rubrificiens</i>    | 2788 | 391  | 1162 | 565  | 670  |
| UP000032749 | 698738  | <i>Oleispira</i>           | <i>antarctica</i>      | 3895 | 651  | 1534 | 780  | 930  |
| UP000032809 | 1006576 | <i>Defluviitoga</i>        | <i>tunisiensis</i>     | 1811 | 226  | 701  | 377  | 507  |
| UP000032900 | 1236989 | <i>Geofilum</i>            | <i>rubicundum</i>      | 4411 | 944  | 1695 | 821  | 951  |
| UP000033070 | 1188319 | <i>Ferriphaseelus</i>      | <i>amnicola</i>        | 2638 | 463  | 1025 | 494  | 656  |
| UP000033103 | 187101  | <i>Sneathia</i>            | <i>amnii</i>           | 1182 | 179  | 468  | 217  | 318  |
| UP000033109 | 400092  | <i>Pontibacter</i>         | <i>kortensis</i>       | 4103 | 820  | 1400 | 776  | 1107 |
| UP000033220 | 1150469 | <i>Pararhodospirillum</i>  | <i>photometricum</i>   | 3275 | 550  | 1333 | 618  | 774  |
| UP000033393 | 68170   | <i>Lechevalieria</i>       | <i>aerocolonigenes</i> | 8237 | 1692 | 2913 | 1538 | 2094 |
| UP000033607 | 1637645 | <i>Limnoraphis</i>         | <i>robusta</i>         | 5035 | 1163 | 1821 | 784  | 1267 |
| UP000033614 | 728     | <i>Avibacterium</i>        | <i>paragallinarum</i>  | 2171 | 215  | 968  | 443  | 545  |
| UP000033651 | 345309  | <i>Luteibacter</i>         | <i>yeojuensis</i>      | 3844 | 612  | 1453 | 808  | 971  |
| UP000033764 | 332411  | <i>Aquitalea</i>           | <i>magnusonii</i>      | 4103 | 486  | 1661 | 873  | 1083 |
| UP000033774 | 552518  | <i>Elstera</i>             | <i>litoralis</i>       | 3298 | 659  | 1469 | 551  | 619  |
| UP000034029 | 407035  | <i>Salinicoccus</i>        | <i>halodurans</i>      | 2634 | 281  | 1083 | 576  | 694  |
| UP000034071 | 914150  | <i>Kangiella</i>           | <i>geojedonensis</i>   | 2207 | 263  | 904  | 451  | 589  |
| UP000034076 | 270498  | <i>Catabacter</i>          | <i>hongkongensis</i>   | 3148 | 678  | 1016 | 573  | 881  |
| UP000034392 | 1267766 | <i>Altererythrobacter</i>  | <i>atlanticus</i>      | 3254 | 463  | 1356 | 662  | 773  |
| UP000034491 | 1549748 | <i>Kiloniella</i>          | <i>litopenaei</i>      | 3735 | 490  | 1541 | 759  | 945  |
| UP000034681 | 317619  | <i>Prochlorothrix</i>      | <i>hollandica</i>      | 3617 | 797  | 1446 | 578  | 788  |
| UP000034883 | 927083  | <i>Sandaracinus</i>        | <i>amylyolyticus</i>   | 8941 | 3080 | 2501 | 1280 | 2080 |
| UP000035032 | 59505   | <i>Actinotignum</i>        | <i>schaalii</i>        | 1443 | 226  | 588  | 283  | 346  |
| UP000035036 | 483547  | <i>Geoalkalibacter</i>     | <i>subterraneus</i>    | 2987 | 521  | 1164 | 553  | 749  |
| UP000035062 | 1195246 | <i>Alishewanella</i>       | <i>agri</i>            | 3152 | 344  | 1273 | 688  | 847  |
| UP000035100 | 1123501 | <i>Wenxinia</i>            | <i>marina</i>          | 4030 | 626  | 1712 | 768  | 924  |
| UP000035170 | 34073   | <i>Variovorax</i>          | <i>paradoxus</i>       | 6788 | 784  | 2801 | 1499 | 1704 |
| UP000035265 | 264251  | <i>Cellulosimicrobium</i>  | <i>funkei</i>          | 3980 | 607  | 1562 | 764  | 1047 |

|             |         |                           |                          |       |      |      |      |      |
|-------------|---------|---------------------------|--------------------------|-------|------|------|------|------|
| UP000035287 | 1348774 | <i>Croceicoccus</i>       | <i>naphthovorans</i>     | 3411  | 616  | 1423 | 645  | 727  |
| UP000035337 | 1408281 | <i>Endomicrobium</i>      | <i>proavitum</i>         | 1336  | 186  | 561  | 250  | 339  |
| UP000035352 | 413882  | <i>Polyangium</i>         | <i>brachysporum</i>      | 5541  | 965  | 2099 | 1048 | 1429 |
| UP000035579 | 48      | <i>Archangium</i>         | <i>gephyra</i>           | 10110 | 3081 | 3037 | 1503 | 2489 |
| UP000035996 | 157733  | <i>Anaerobacillus</i>     | <i>macyae</i>            | 3973  | 469  | 1619 | 766  | 1119 |
| UP000036352 | 988812  | <i>Marinovum</i>          | <i>algicola</i>          | 4976  | 646  | 2179 | 1001 | 1150 |
| UP000036700 | 445709  | <i>Pandoraea</i>          | <i>thiooxydans</i>       | 3963  | 286  | 1627 | 971  | 1079 |
| UP000036771 | 1629334 | <i>Caedibacter</i>        | <i>varicaedens</i>       | 1663  | 393  | 656  | 261  | 353  |
| UP000036780 | 1473    | <i>Virgibacillus</i>      | <i>pantothenicus</i>     | 3923  | 539  | 1582 | 753  | 1049 |
| UP000037269 | 47500   | <i>Aneurinibacillus</i>   | <i>migulanus</i>         | 5649  | 1073 | 2080 | 998  | 1497 |
| UP000037784 | 872965  | <i>Ardenticatena</i>      | <i>maritima</i>          | 3144  | 641  | 1047 | 578  | 878  |
| UP000037939 | 857265  | <i>Amantichitinum</i>     | <i>ursilacus</i>         | 4368  | 632  | 1737 | 884  | 1115 |
| UP000037969 | 2026    | <i>Thermoactinomyces</i>  | <i>vulgaris</i>          | 3820  | 1005 | 1467 | 595  | 753  |
| UP000038011 | 1514904 | <i>Ahrensia</i>           | <i>marina</i>            | 3161  | 329  | 1434 | 638  | 760  |
| UP000046155 | 499207  | <i>Syntrophaceticus</i>   | <i>schinkii</i>          | 3167  | 685  | 1326 | 513  | 643  |
| UP000048984 | 665126  | <i>Prosthecomicrobium</i> | <i>hirschii</i>          | 5501  | 771  | 2345 | 1098 | 1287 |
| UP000050280 | 1300341 | <i>Croceitalea</i>        | <i>dokdonensis</i>       | 3682  | 1008 | 1296 | 575  | 803  |
| UP000050326 | 36849   | <i>Oxobacter</i>          | <i>pfennigii</i>         | 4273  | 741  | 1629 | 777  | 1126 |
| UP000050331 | 1472767 | <i>Lentibacillus</i>      | <i>amyloliquefaciens</i> | 3553  | 521  | 1434 | 711  | 887  |
| UP000050417 | 1134406 | <i>Ornatilinea</i>        | <i>apprima</i>           | 3344  | 634  | 1220 | 605  | 885  |
| UP000050430 | 229920  | <i>Leptolinea</i>         | <i>tardivitalis</i>      | 2936  | 517  | 1122 | 539  | 758  |
| UP000050465 | 1666911 | <i>Phormidesmis</i>       | <i>priestleyi</i>        | 4851  | 1118 | 1778 | 791  | 1164 |
| UP000050471 | 154981  | <i>Aliiroseovarius</i>    | <i>crassostreae</i>      | 3465  | 593  | 1511 | 627  | 734  |
| UP000050501 | 229921  | <i>Levilinea</i>          | <i>saccharolytica</i>    | 3080  | 505  | 1148 | 591  | 836  |
| UP000050509 | 186479  | <i>Kouleothrix</i>        | <i>aurantiaca</i>        | 7836  | 2579 | 2846 | 1082 | 1329 |
| UP000050514 | 360411  | <i>Bellilinea</i>         | <i>caldifistulae</i>     | 2990  | 612  | 1066 | 524  | 788  |
| UP000050544 | 869279  | <i>Thermanaerotherix</i>  | <i>daxensis</i>          | 2394  | 342  | 920  | 495  | 637  |

**Supplementary Table 2** Domains co-occurrent with equal to or more than 20 other domains in four representative bacterial species, *Deinococcus deserti*, *Yersinia pestis*, *Helicobacter pylori*, and *Anaplasma phagocytophilum*, were listed. In each bacterium, a domain (marked in red) was chosen to discuss its biological significance in bacterial physiology, which were MarR, HisKA, ResIII and FeoB\_N, respectively. All the listed domains were highlighted in yellow in **Figure 2**.

| Core Domains in <i>Deinococcus deserti</i> | Core Domains in <i>Yersinia pestis</i> | Core Domains in <i>Helicobacter pylori</i> | Core Domains in <i>Anaplasma phagocytophilum</i> |
|--------------------------------------------|----------------------------------------|--------------------------------------------|--------------------------------------------------|
| AAA                                        | AAA                                    | AAA                                        | AAA                                              |
| AAA_16                                     | AAA_16                                 | AAA_16                                     | AAA_16                                           |
| AAA_2                                      | AAA_19                                 | AAA_22                                     | AAA_5                                            |
| AAA_22                                     | AAA_21                                 | AAA_24                                     | <b>FeoB_N</b>                                    |
| AAA_29                                     | AAA_22                                 | AAA_30                                     | GTP_EFTU                                         |
| AAA_30                                     | AAA_23                                 | AAA_5                                      | MMR_HSR1                                         |
| AAA_5                                      | AAA_29                                 | ABC_tran                                   |                                                  |
| ABC_tran                                   | AAA_30                                 | GTP_EFTU                                   |                                                  |
| CbiA                                       | AAA_5                                  | MMR_HSR1                                   |                                                  |
| DEAD                                       | ABC_tran                               | <b>ResIII</b>                              |                                                  |

|              |                 |  |  |
|--------------|-----------------|--|--|
| GAF          | Acetyltransf_10 |  |  |
| GAF_2        | Cons_hypoth95   |  |  |
| GGDEF        | DAO             |  |  |
| GTP_EFTU     | DEAD            |  |  |
| HATPase_c    | Epimerase       |  |  |
| HD           | FAD_binding_2   |  |  |
| HHH_5        | FAD_binding_3   |  |  |
| HTH_11       | FeoB_N          |  |  |
| HTH_24       | Fer4            |  |  |
| HTH_Crp_2    | Fer4_10         |  |  |
| HTH_IclR     | Fer4_17         |  |  |
| Helicase_C   | Fer4_2          |  |  |
| HisKA        | Fer4_6          |  |  |
| MMR_HSR1     | Fer4_7          |  |  |
| <b>MarR</b>  | Fer4_9          |  |  |
| MarR_2       | GTP_EFTU        |  |  |
| PAS          | HAMP            |  |  |
| PAS_3        | HATPase_c       |  |  |
| PAS_4        | HTH_11          |  |  |
| PAS_8        | HTH_23          |  |  |
| PAS_9        | HTH_24          |  |  |
| ResIII       | HTH_3           |  |  |
| Response_reg | Helicase_C      |  |  |
| TPR_12       | <b>HisKA</b>    |  |  |
|              | KR              |  |  |
|              | MMR_HSR1        |  |  |
|              | MTS             |  |  |
|              | Methyltransf_11 |  |  |
|              | Methyltransf_12 |  |  |
|              | Methyltransf_23 |  |  |
|              | Methyltransf_25 |  |  |
|              | Methyltransf_31 |  |  |
|              | NAD_binding_8   |  |  |
|              | PP-binding      |  |  |
|              | PrmA            |  |  |
|              | Pyr_redox       |  |  |
|              | Pyr_redox_2     |  |  |
|              | Response_reg    |  |  |
|              | RsgA_GTPase     |  |  |
|              | SMC_N           |  |  |
|              | TPP_enzyme_C    |  |  |



|  |                 |  |  |
|--|-----------------|--|--|
|  | Thioesterase    |  |  |
|  | Thiolase_N      |  |  |
|  | UPF0020         |  |  |
|  | Ubie_methyltran |  |  |
|  | adh_short       |  |  |
|  | adh_short_C2    |  |  |

**Supplementary Table 3** Unique domains identified in each of the 944 bacterial proteomes analysed in this study. According to the results, some bacterial species have multiple unique domains in their proteomes while others have none. Domain names used here were the names of standard Pfam families, functions of which can be retrieved easily from online web server <http://pfam.xfam.org/>. Ideally, all species-specific domains could serve as putative biomarkers. However, experimental validation should be provided before any assertion is made.

| UniProt Proteome ID | Taxonomy ID | Genus                       | Species                   | Proteome Size | Unique Domains                                                  |
|---------------------|-------------|-----------------------------|---------------------------|---------------|-----------------------------------------------------------------|
| UP000000212         | 1234679     | <i>Carnobacterium</i>       | <i>maltaromaticum</i>     | 3539          | TFIIF_beta                                                      |
| UP000000214         | 1171373     | <i>Propionibacterium</i>    | <i>acidipropionici</i>    | 3316          | DUF4746                                                         |
| UP000000229         | 399739      | <i>Pseudomonas</i>          | <i>mendocina</i>          | 4563          | DUF2025, DUF5447, HrpA_pilin, KinB_sensor                       |
| UP000000231         | 312153      | <i>Polynucleobacter</i>     | <i>necessarius</i>        | 2074          |                                                                 |
| UP000000235         | 369723      | <i>Salinispora</i>          | <i>tropica</i>            | 4522          | GP24_25, RRP7                                                   |
| UP000000238         | 349521      | <i>Hahella</i>              | <i>chejuensis</i>         | 6751          | CRC_subunit, DUF4875                                            |
| UP000000239         | 290398      | <i>Chromohalobacter</i>     | <i>salexigens</i>         | 3298          | PIG-F                                                           |
| UP000000243         | 391295      | <i>Streptococcus</i>        | <i>suis</i>               | 2178          | DUF5043, PHtD_u1, Streptin-Immun, JmjN, DUF4651, DUF3272, efb-c |
| UP000000245         | 349163      | <i>Acidiphilium</i>         | <i>cryptum</i>            | 3521          |                                                                 |
| UP000000248         | 246195      | <i>Dichelobacter</i>        | <i>nodosus</i>            | 1273          |                                                                 |
| UP000000256         | 351627      | <i>Caldicellulosiruptor</i> | <i>saccharolyticus</i>    | 2629          | Pox_A22, DUF3527, Med25_VWA, PAP_RNA-bind, MetRS-N              |
| UP000000260         | 290339      | <i>Cronobacter</i>          | <i>sakazakii</i>          | 4421          | DUF2737, cIII                                                   |
| UP000000268         | 329726      | <i>Acaryochloris</i>        | <i>marina</i>             | 8172          | Peptidase_C3, Doppel, Baculo_PP31, DUF3632, MU117               |
| UP000000269         | 350688      | <i>Alkaliphilus</i>         | <i>oremlandii</i>         | 2828          | IFT46_B_C, HN, DUF3091,                                         |
| UP000000270         | 438753      | <i>Azorhizobium</i>         | <i>caulinodans</i>        | 4708          | AbLIM_anchor                                                    |
| UP000000272         | 555079      | <i>Thermosediminibacter</i> | <i>oceani</i>             | 2151          |                                                                 |
| UP000000276         | 681645      | <i>Corynebacterium</i>      | <i>pseudotuberculosis</i> | 2090          |                                                                 |
| UP000000291         | 1051632     | <i>Sulfobacillus</i>        | <i>acidophilus</i>        | 3722          | E3_UbLigase_EDD, Clusterin, BBL5,                               |
| UP000000310         | 762903      | <i>Pseudopedobacter</i>     | <i>saltans</i>            | 3780          | DUF4933, NBD94, Cytochrome_UL20A, U3_snoRNA_assoc               |
| UP000000321         | 287752      | <i>Aurantimonas</i>         | <i>manganooxydans</i>     | 3625          |                                                                 |
| UP000000322         | 446469      | <i>Sanguibacter</i>         | <i>keddiei</i>            | 3710          | IncD                                                            |
| UP000000323         | 525904      | <i>Thermobaculum</i>        | <i>terrenum</i>           | 2827          | Hormone_3, EF-hand_like, DLEU7                                  |
| UP000000329         | 757424      | <i>Herbaspirillum</i>       | <i>seropedicae</i>        | 4732          | UTP15_C, Cytochrom_B558a                                        |
| UP000000333         | 633147      | <i>Olsenella</i>            | <i>uli</i>                | 1739          |                                                                 |
| UP000000343         | 1198114     | <i>Granulicella</i>         | <i>tundricola</i>         | 4514          | Dynein_attach_N                                                 |
| UP000000361         | 318586      | <i>Paracoccus</i>           | <i>denitrificans</i>      | 5019          | MauJ                                                            |

|             |         |                            |                        |       |                                                                                                                        |
|-------------|---------|----------------------------|------------------------|-------|------------------------------------------------------------------------------------------------------------------------|
| UP000000362 | 203120  | <i>Leuconostoc</i>         | <i>mesenteroides</i>   | 2002  | Tmemb_161AB, MMM1, Base-plate                                                                                          |
| UP000000366 | 420662  | <i>Methylibium</i>         | <i>petroleiphilum</i>  | 4359  |                                                                                                                        |
| UP000000370 | 357809  | <i>Clostridium</i>         | <i>phytofermentans</i> | 3891  | DUF3161                                                                                                                |
| UP000000374 | 391735  | <i>Verminephrobacter</i>   | <i>eiseniae</i>        | 4911  | DUF3736                                                                                                                |
| UP000000376 | 644284  | <i>Arcanobacterium</i>     | <i>haemolyticum</i>    | 1717  |                                                                                                                        |
| UP000000377 | 749414  | <i>Streptomyces</i>        | <i>bingchenggensis</i> | 10019 | SpdB                                                                                                                   |
| UP000000378 | 643648  | <i>Syntrophothermus</i>    | <i>lipocalidus</i>     | 2311  |                                                                                                                        |
| UP000000379 | 649638  | <i>Truepera</i>            | <i>radiovictrix</i>    | 2924  |                                                                                                                        |
| UP000000383 | 666681  | <i>Methylotenera</i>       | <i>versatilis</i>      | 2752  |                                                                                                                        |
| UP000000387 | 762948  | <i>Rothia</i>              | <i>dentocariosa</i>    | 2212  |                                                                                                                        |
| UP000000417 | 292459  | <i>Symbiobacterium</i>     | <i>thermophilum</i>    | 3313  |                                                                                                                        |
| UP000000422 | 273121  | <i>Wolinella</i>           | <i>succinogenes</i>    | 2028  |                                                                                                                        |
| UP000000423 | 273119  | <i>Ureaplasma</i>          | <i>parvum</i>          | 611   | DUF5452, DUF5378                                                                                                       |
| UP000000425 | 122586  | <i>Neisseria</i>           | <i>meningitidis</i>    | 2001  | Pilin_PilX, TAA-Trp-ring, DMP12, FrpC, MafB                                                                            |
| UP000000429 | 85962   | <i>Helicobacter</i>        | <i>pylori</i>          | 1553  | CagA, TAN, CagZ, Tipalpha, PGBA_C, CagY_I, VacA2, CagY_M                                                               |
| UP000000430 | 62977   | <i>Acinetobacter</i>       | <i>baylyi</i>          | 3263  | Pox_LP_H2                                                                                                              |
| UP000000434 | 269800  | <i>Thermobifida</i>        | <i>fusca</i>           | 3085  |                                                                                                                        |
| UP000000439 | 206672  | <i>Bifidobacterium</i>     | <i>longum</i>          | 1725  |                                                                                                                        |
| UP000000440 | 197221  | <i>Thermosynechococcus</i> | <i>elongatus</i>       | 2451  | DUF2410, DUF4472, Baculo_F                                                                                             |
| UP000000442 | 177437  | <i>Desulfobacterium</i>    | <i>autotrophicum</i>   | 4846  |                                                                                                                        |
| UP000000444 | 396513  | <i>Staphylococcus</i>      | <i>carnosus</i>        | 2460  | TAFH, Staphopain_pro, Staphostatin_B, DUF1381, DUF4887, COPI_assoc, DUF2483, SSL_OB, FAM70, DUF4889, AgrD, Staph_haemo |
| UP000000447 | 309801  | <i>Thermomicrobium</i>     | <i>roseum</i>          | 2858  |                                                                                                                        |
| UP000000448 | 598659  | <i>Nautilia</i>            | <i>profundicola</i>    | 1730  |                                                                                                                        |
| UP000000466 | 1117647 | <i>Simidiua</i>            | <i>agarivorans</i>     | 3812  | PLRV_ORF5, Peptidase_C5                                                                                                |
| UP000000467 | 1089553 | <i>Thermacetogenium</i>    | <i>phaeum</i>          | 2803  | DUF3420                                                                                                                |
| UP000000483 | 880072  | <i>Desulfobacca</i>        | <i>acetoxidans</i>     | 2859  | Ntox14                                                                                                                 |
| UP000000485 | 593907  | <i>Cellulomonas</i>        | <i>gilvus</i>          | 3153  | Chorion_1, DASH_Dad3                                                                                                   |
| UP000000493 | 761193  | <i>Runella</i>             | <i>slithyformis</i>    | 5750  | MWFE                                                                                                                   |
| UP000000495 | 765952  | <i>Parachlamydia</i>       | <i>acanthamoebae</i>   | 2784  | CNOT1_CAF1_bind, Elongin_A                                                                                             |
| UP000000496 | 331113  | <i>Simkania</i>            | <i>negevensis</i>      | 2516  | HECT, PAM2, PaRep2b, P_C10                                                                                             |
| UP000000503 | 744872  | <i>Treponema</i>           | <i>caldarium</i>       | 2754  | FTH, DUF1897                                                                                                           |
| UP000000504 | 903503  | <i>Moranella</i>           | <i>endobia</i>         | 405   |                                                                                                                        |
| UP000000517 | 59374   | <i>Fibrobacter</i>         | <i>succinogenes</i>    | 2871  | Laps, GYF, Tfb5,                                                                                                       |
| UP000000528 | 272635  | <i>Mycoplasma</i>          | <i>pulmonis</i>        | 778   | TBPIP_N, Lipoprotein_X                                                                                                 |
| UP000000529 | 264201  | <i>Protochlamydia</i>      | <i>amoebophila</i>     | 2023  | DUF3689, SPT_ssu-like                                                                                                  |
| UP000000532 | 300852  | <i>Thermus</i>             | <i>thermophilus</i>    | 2227  |                                                                                                                        |

|             |        |                         |                           |      |                                                                                                                                                                                                                                                                                                                                                                                                                                                                                                                                                 |
|-------------|--------|-------------------------|---------------------------|------|-------------------------------------------------------------------------------------------------------------------------------------------------------------------------------------------------------------------------------------------------------------------------------------------------------------------------------------------------------------------------------------------------------------------------------------------------------------------------------------------------------------------------------------------------|
| UP000000533 | 302409 | <i>Ehrlichia</i>        | <i>ruminantium</i>        | 948  | DUF3514, DUF3023                                                                                                                                                                                                                                                                                                                                                                                                                                                                                                                                |
| UP000000537 | 312309 | <i>Vibrio</i>           | <i>fischeri</i>           | 3813 |                                                                                                                                                                                                                                                                                                                                                                                                                                                                                                                                                 |
| UP000000546 | 259536 | <i>Psychrobacter</i>    | <i>arcticus</i>           | 2099 | L_lactis_ph-MCP, BLYB                                                                                                                                                                                                                                                                                                                                                                                                                                                                                                                           |
| UP000000547 | 167879 | <i>Colwellia</i>        | <i>psychrerythraea</i>    | 4872 | CR6_interact, PPPI_inhib                                                                                                                                                                                                                                                                                                                                                                                                                                                                                                                        |
| UP000000550 | 159087 | <i>Dechloromonas</i>    | <i>aromatica</i>          | 4155 |                                                                                                                                                                                                                                                                                                                                                                                                                                                                                                                                                 |
| UP000000552 | 266835 | <i>Rhizobium</i>        | <i>loti</i>               | 7255 | Prok-E2_C, Metal_CEHH, Benyvirus_P25, DUF2604                                                                                                                                                                                                                                                                                                                                                                                                                                                                                                   |
| UP000000555 | 273068 | <i>Caldanaerobacter</i> | <i>subterraneus</i>       | 2545 | E6, Josephin, IFT20                                                                                                                                                                                                                                                                                                                                                                                                                                                                                                                             |
| UP000000557 | 251221 | <i>Gloeobacter</i>      | <i>violaceus</i>          | 4406 | IncE, BRO1                                                                                                                                                                                                                                                                                                                                                                                                                                                                                                                                      |
| UP000000562 | 36870  | <i>Wigglesworthia</i>   | <i>glossinidia</i>        | 617  |                                                                                                                                                                                                                                                                                                                                                                                                                                                                                                                                                 |
| UP000000566 | 435591 | <i>Parabacteroides</i>  | <i>distasonis</i>         | 3830 | DUF4621, DUF5024, DUF5032                                                                                                                                                                                                                                                                                                                                                                                                                                                                                                                       |
| UP000000577 | 243231 | <i>Geobacter</i>        | <i>sulfurreducens</i>     | 3402 | Transposase_24, BID                                                                                                                                                                                                                                                                                                                                                                                                                                                                                                                             |
| UP000000579 | 71421  | <i>Haemophilus</i>      | <i>influenzae</i>         | 1707 |                                                                                                                                                                                                                                                                                                                                                                                                                                                                                                                                                 |
| UP000000580 | 262316 | <i>Mycobacterium</i>    | <i>paratuberculosis</i>   | 4316 | LpqV, MHB, PE_PPE_C                                                                                                                                                                                                                                                                                                                                                                                                                                                                                                                             |
| UP000000581 | 257314 | <i>Lactobacillus</i>    | <i>johnsonii</i>          | 1809 | Phospholamban, DUF5504, Peptidase_C78, DUF3402, DUF2115                                                                                                                                                                                                                                                                                                                                                                                                                                                                                         |
| UP000000588 | 242619 | <i>Porphyromonas</i>    | <i>gingivalis</i>         | 1863 |                                                                                                                                                                                                                                                                                                                                                                                                                                                                                                                                                 |
| UP000000593 | 74109  | <i>Photobacterium</i>   | <i>profundum</i>          | 5328 | THP2, DUF789, Sterol_MT_C                                                                                                                                                                                                                                                                                                                                                                                                                                                                                                                       |
| UP000000594 | 1392   | <i>Bacillus</i>         | <i>anthracis</i>          | 5493 | Proteasom_PSMB, DUF4027, DUF5514, DUF3896, DUF3910, DUF3932, DUF3975, DUF4021, DUF3935, Bacteriocin_IIi, DUF3894, lci, DUF3913, DUF3925, DUF3978, Bacillus_PapR, DUF3912, DUF3965, DUF3985, DUF5511, DUF4022, DUF4024, DUF3963, DUF3966, DUF3926, YmzC, DUF3979, DUF3908, DUF5513, DUF3974, DUF3981, DUF3914, DUF5512, DUF3942, DUF3921, DUF3924, DUF4028, DUF3928, DUF4075, DUF3911, DUF3934, DUF3980, DUF3976, Corona_NS3b, DUF3929, DUF4052, Anthrax-tox_M, DUF3917, DUF4084, Connexin, DUF3931, DUF3960, DUF3930, DUF3992, DUF3956, DUF3983 |
| UP000000602 | 177439 | <i>Desulfotalea</i>     | <i>psychrophila</i>       | 3233 | HEXIM, Chloroplast_duf                                                                                                                                                                                                                                                                                                                                                                                                                                                                                                                          |
| UP000000605 | 272560 | <i>Burkholderia</i>     | <i>pseudomallei</i>       | 5717 | FliC_SP, DUF2866, DUF3564                                                                                                                                                                                                                                                                                                                                                                                                                                                                                                                       |
| UP000000607 | 221988 | <i>Mannheimia</i>       | <i>succiniciproducens</i> | 2367 | DUF3585                                                                                                                                                                                                                                                                                                                                                                                                                                                                                                                                         |
| UP000000609 | 272624 | <i>Legionella</i>       | <i>pneumophila</i>        | 2930 | 7kD_coat, DrrA_P4M                                                                                                                                                                                                                                                                                                                                                                                                                                                                                                                              |
| UP000000625 | 83333  | <i>Escherichia</i>      | <i>coli</i>               | 4306 | CHASE9, YjbT, DUF5503, YmcE_antitoxin, RPAP2_Rtr1, Imm57, DicB, DUF2713, Tna_leader, DUF1327, DUF1187, GAPES2, DUF4049, Ibs_toxin                                                                                                                                                                                                                                                                                                                                                                                                               |
| UP000000628 | 471856 | <i>Jonesia</i>          | <i>denitrificans</i>      | 2495 | Chorion_S16, B3R                                                                                                                                                                                                                                                                                                                                                                                                                                                                                                                                |

|            |        |                            |                            |      |                                                                                      |
|------------|--------|----------------------------|----------------------------|------|--------------------------------------------------------------------------------------|
| UP00000637 | 290340 | <i>Arthrobacter</i>        | <i>aurescens</i>           | 4565 | Med25_SD1                                                                            |
| UP00000639 | 357804 | <i>Psychromonas</i>        | <i>ingrahamii</i>          | 3530 | SRX, DUF4757, DOCK-C2                                                                |
| UP00000643 | 360095 | <i>Bartonella</i>          | <i>bacilliformis</i>       | 1255 |                                                                                      |
| UP00000644 | 365044 | <i>Polaromonas</i>         | <i>naphthalenivorans</i>   | 4879 |                                                                                      |
| UP00000647 | 349124 | <i>Halorhodospira</i>      | <i>halophila</i>           | 2406 |                                                                                      |
| UP00000657 | 326424 | <i>Frankia</i>             | <i>alni</i>                | 6710 | Intimin_C                                                                            |
| UP00000671 | 234267 | <i>Solibacter</i>          | <i>usitatus</i>            | 7761 | Baculo_ME53, DUF5092, DUF620                                                         |
| UP00000684 | 318167 | <i>Shewanella</i>          | <i>frigidimarina</i>       | 3990 | Nckap1                                                                               |
| UP00000718 | 289376 | <i>Thermodesulfovibrio</i> | <i>yellowstonii</i>        | 1982 | Toxin_29, MITF_TFEB_C_3_N, W2,                                                       |
| UP00000719 | 373903 | <i>Halothermothrix</i>     | <i>oreni</i>               | 2324 | S-antigen, Nfn1                                                                      |
| UP00000723 | 511995 | <i>Azobacteroides</i>      | <i>pseudotrichonymphae</i> | 847  | DUF4606                                                                              |
| UP00000738 | 465515 | <i>Micrococcus</i>         | <i>luteus</i>              | 2207 | PMP1_2                                                                               |
| UP00000739 | 439235 | <i>Desulfatibacillum</i>   | <i>alkenivorans</i>        | 5198 | WRC, TSP_1                                                                           |
| UP00000755 | 411154 | <i>Gramella</i>            | <i>forsetii</i>            | 3554 |                                                                                      |
| UP00000756 | 380703 | <i>Aeromonas</i>           | <i>hydrophila</i>          | 4121 | DUF4371, Eisosome1                                                                   |
| UP00000760 | 360106 | <i>Campylobacter</i>       | <i>fetus</i>               | 1715 | Orbi_VP1, eIF-4B                                                                     |
| UP00000771 | 525909 | <i>Acidimicrobium</i>      | <i>ferrooxidans</i>        | 1935 | LRS4                                                                                 |
| UP00000773 | 278197 | <i>Pediococcus</i>         | <i>pentosaceus</i>         | 1755 |                                                                                      |
| UP00000774 | 203123 | <i>Oenococcus</i>          | <i>oeni</i>                | 1682 |                                                                                      |
| UP00000781 | 444179 | <i>Sulcia</i>              | <i>muelleri</i>            | 227  |                                                                                      |
| UP00000784 | 398578 | <i>Delftia</i>             | <i>acidovorans</i>         | 5968 |                                                                                      |
| UP00000787 | 316274 | <i>Herpetosiphon</i>       | <i>aurantiacus</i>         | 5254 | Nbas_N, NtA, MRC1, Herpeto_peptide                                                   |
| UP00000788 | 93059  | <i>Prochlorococcus</i>     | <i>marinus</i>             | 1855 | DUF3104                                                                              |
| UP00000798 | 224324 | <i>Aquifex</i>             | <i>aeolicus</i>            | 1553 | Vps54_N, DUF4507                                                                     |
| UP00000809 | 272843 | <i>Pasteurella</i>         | <i>multocida</i>           | 2015 | DUF5376                                                                              |
| UP00000812 | 160492 | <i>Xylella</i>             | <i>fastidiosa</i>          | 2772 | DUF769                                                                               |
| UP00000813 | 176299 | <i>Agrobacterium</i>       | <i>fabrum</i>              | 5344 | VirE1, VirE2, Agro_virD5                                                             |
| UP00000815 | 632    | <i>Yersinia</i>            | <i>pestis</i>              | 3909 | SepQ, Antig_CafI, DUF5463, PsaF, YopE_N, Transposase_1, Exotox-A_bind, His_binding   |
| UP00000817 | 169963 | <i>Listeria</i>            | <i>monocytogenes</i>       | 2844 | DUF5502, APG12, Phage-A118_gp45, DUF5072, POT1, DUF2481, Phage_Gp23, Nop10p, DUF3116 |
| UP00000822 | 221109 | <i>Oceanobacillus</i>      | <i>ihyensis</i>            | 3490 | MICSWaP, PHA-1                                                                       |
| UP00000841 | 471857 | <i>Saccharomonospora</i>   | <i>viridis</i>             | 3828 | HRG                                                                                  |
| UP00000844 | 446470 | <i>Stackebrandtia</i>      | <i>nassauensis</i>         | 6379 | Sec16_N                                                                              |
| UP00000845 | 526218 | <i>Sebaldella</i>          | <i>termitidis</i>          | 4124 | RGS-like, VirArc_Nuclease, DUF3216, DUF530                                           |
| UP00000851 | 479433 | <i>Catenulispora</i>       | <i>acidiphila</i>          | 8909 | TEX13                                                                                |
| UP00000852 | 485917 | <i>Pedobacter</i>          | <i>heparinus</i>           | 4249 | PEN-2                                                                                |
| UP00000925 | 583355 | <i>Coralimargarita</i>     | <i>akajimensis</i>         | 3110 |                                                                                      |
| UP00000927 | 264731 | <i>Prevotella</i>          | <i>ruminicola</i>          | 2761 | Barttin, Nitrophorin                                                                 |

|            |        |                          |                              |      |                                                                                                                                                                                 |
|------------|--------|--------------------------|------------------------------|------|---------------------------------------------------------------------------------------------------------------------------------------------------------------------------------|
| UP00000930 | 749219 | <i>Moraxella</i>         | <i>catarrhalis</i>           | 1881 | DUF1079                                                                                                                                                                         |
| UP00000939 | 572480 | <i>Arcobacter</i>        | <i>nitrofigilis</i>          | 3125 | WD-3                                                                                                                                                                            |
| UP00000948 | 634452 | <i>Acetobacter</i>       | <i>pasteurianus</i>          | 2906 |                                                                                                                                                                                 |
| UP00000954 | 469378 | <i>Cryptobacterium</i>   | <i>curtum</i>                | 1355 | Phage_term_sma                                                                                                                                                                  |
| UP00000960 | 521095 | <i>Atopobium</i>         | <i>parvulum</i>              | 1353 | EphA2_TM                                                                                                                                                                        |
| UP00000998 | 351348 | <i>Marinobacter</i>      | <i>hydrocarbonoclasticus</i> | 4170 |                                                                                                                                                                                 |
| UP00001007 | 194439 | <i>Chlorobium</i>        | <i>tepidum</i>               | 2250 |                                                                                                                                                                                 |
| UP00001010 | 190485 | <i>Xanthomonas</i>       | <i>campestris</i>            | 4127 | Tail_VII                                                                                                                                                                        |
| UP00001014 | 99287  | <i>Salmonella</i>        | <i>typhimurium</i>           | 4533 | COA2, SpvD, DUF2689, SopA_C, TraQ, AfaD, SecIII_SopE_N, InvH, Saf-Nte pilin, PipA                                                                                               |
| UP00001023 | 246200 | <i>Ruegeria</i>          | <i>pomeroyi</i>              | 4269 | Orbi_VP7                                                                                                                                                                        |
| UP00001025 | 243090 | <i>Rhodopirellula</i>    | <i>baltica</i>               | 7271 | DUF3770, DUF1556, DUF1560, PGAMP, DUF1590, PSRT, DUF1582, QPP, DUF1586, DUF1589, PEGSRP                                                                                         |
| UP00001029 | 445932 | <i>Elusimicrobium</i>    | <i>minutum</i>               | 1528 | DUF5093                                                                                                                                                                         |
| UP00001031 | 349741 | <i>Akkermansia</i>       | <i>muciniphila</i>           | 2137 | Bud13, EP400_N                                                                                                                                                                  |
| UP00001036 | 498211 | <i>Cellvibrio</i>        | <i>japonicus</i>             | 3711 | Prp19, CBM_15                                                                                                                                                                   |
| UP00001052 | 485915 | <i>Desulfohalobium</i>   | <i>retbaense</i>             | 2500 |                                                                                                                                                                                 |
| UP00001062 | 717774 | <i>Marinomonas</i>       | <i>mediterranea</i>          | 4118 | CLP1_N                                                                                                                                                                          |
| UP00001110 | 391009 | <i>Thermosiphon</i>      | <i>melanesiensis</i>         | 1877 | ORC4_C, Pex16, Tubulin_3, DUF2666                                                                                                                                               |
| UP00001114 | 339671 | <i>Actinobacillus</i>    | <i>succinogenes</i>          | 2077 |                                                                                                                                                                                 |
| UP00001116 | 266940 | <i>Kineococcus</i>       | <i>radiotolerans</i>         | 4674 |                                                                                                                                                                                 |
| UP00001171 | 283942 | <i>Idiomarina</i>        | <i>loihiensis</i>            | 2608 | Neurochondrin, EIF4E-T                                                                                                                                                          |
| UP00001172 | 235909 | <i>Geobacillus</i>       | <i>kaustophilus</i>          | 3516 | DUF5370, MbeB_N, TMEM138, CsgA, Hormone_1, RNA pol Rpc4, RTP                                                                                                                    |
| UP00001173 | 264203 | <i>Zymomonas</i>         | <i>mobilis</i>               | 1779 | Peptidase_C23                                                                                                                                                                   |
| UP00001174 | 177416 | <i>Francisella</i>       | <i>tularensis</i>            | 1528 | PI3Ka, IglC                                                                                                                                                                     |
| UP00001176 | 272568 | <i>Gluconacetobacter</i> | <i>diazotrophicus</i>        | 3783 |                                                                                                                                                                                 |
| UP00001191 | 63737  | <i>Nostoc</i>            | <i>punctiforme</i>           | 6573 | DUF846, N-SET, Arm_2, DUF1392                                                                                                                                                   |
| UP00001205 | 314724 | <i>Borrelia</i>          | <i>turicatae</i>             | 818  | Borrelia_lipo_2, DUF693, DUF764, DUF1473, DUF244, DUF1463, DUF1506, DUF735, Vps39_2, DUF276, DUF792, Borrelia_orfD, DUF3890, DUF1357, Mlp, DUF226, Borrelia_orfA, Lipoprotein 2 |
| UP00001208 | 517418 | <i>Chloroherpeton</i>    | <i>thalassium</i>            | 2708 |                                                                                                                                                                                 |
| UP00001213 | 521096 | <i>Tsukamurella</i>      | <i>paurometabola</i>         | 4170 | Deltameth_res                                                                                                                                                                   |
| UP00001219 | 526226 | <i>Gordonia</i>          | <i>bronchialis</i>           | 4628 |                                                                                                                                                                                 |
| UP00001225 | 340100 | <i>Bordetella</i>        | <i>petrii</i>                | 4912 |                                                                                                                                                                                 |
| UP00001227 | 452471 | <i>Amoebophilus</i>      | <i>asiaticus</i>             | 1253 |                                                                                                                                                                                 |
| UP00001235 | 395494 | <i>Gallionella</i>       | <i>capsiferriformans</i>     | 2853 | Not1, DUF678                                                                                                                                                                    |
| UP00001299 | 515622 | <i>Butyrivibrio</i>      | <i>proteoclasticus</i>       | 3799 | Fmp27_SW, BRCT_assoc, FB lectin                                                                                                                                                 |

|             |        |                             |                       |      |                                                                                                                                                                         |
|-------------|--------|-----------------------------|-----------------------|------|-------------------------------------------------------------------------------------------------------------------------------------------------------------------------|
| UP000001302 | 314260 | <i>Parvularcula</i>         | <i>bermudensis</i>    | 2687 | Nucleocap_ssRNA,<br>SCNM1_acidic                                                                                                                                        |
| UP000001303 | 871271 | <i>Zinderia</i>             | <i>insecticola</i>    | 206  |                                                                                                                                                                         |
| UP000001306 | 281090 | <i>Leifsonia</i>            | <i>xyli</i>           | 2001 | DUF2688                                                                                                                                                                 |
| UP000001318 | 31964  | <i>Clavibacter</i>          | <i>michiganensis</i>  | 3058 |                                                                                                                                                                         |
| UP000001319 | 334413 | <i>Finegoldia</i>           | <i>magna</i>          | 1813 | DUF1108, HORMA                                                                                                                                                          |
| UP000001332 | 864702 | <i>Oscillatoriales</i>      | <i>cyanobacterium</i> | 4673 | DDHD, Gp17                                                                                                                                                              |
| UP000001351 | 378806 | <i>Stigmatella</i>          | <i>aurantiaca</i>     | 8307 | Nucleoporin_FG                                                                                                                                                          |
| UP000001362 | 243159 | <i>Acidithiobacillus</i>    | <i>ferrooxidans</i>   | 3120 |                                                                                                                                                                         |
| UP000001366 | 123214 | <i>Persephonella</i>        | <i>marina</i>         | 2048 |                                                                                                                                                                         |
| UP000001369 | 204536 | <i>Sulfurihydrogenibium</i> | <i>azorense</i>       | 1708 | Ribophorin_II                                                                                                                                                           |
| UP000001377 | 479437 | <i>Eggerthella</i>          | <i>lenta</i>          | 3054 |                                                                                                                                                                         |
| UP000001382 | 526225 | <i>Geodermatophilus</i>     | <i>obscurus</i>       | 4795 |                                                                                                                                                                         |
| UP000001383 | 458233 | <i>Macrococcus</i>          | <i>caseolyticus</i>   | 2059 | 7TM_GPCR_Srb                                                                                                                                                            |
| UP000001399 | 648757 | <i>Rhodomicrobium</i>       | <i>vannielii</i>      | 3513 |                                                                                                                                                                         |
| UP000001405 | 713887 | <i>Atelocyanobacterium</i>  | <i>thalassa</i>       | 1199 |                                                                                                                                                                         |
| UP000001408 | 189518 | <i>Leptospira</i>           | <i>interrogans</i>    | 3676 | Med13_C, DUF1420, AP3D1,<br>DUF1229, DUF1563                                                                                                                            |
| UP000001414 | 226186 | <i>Bacteroides</i>          | <i>thetaitoamicon</i> | 4782 | Imm65, DUF5030, CUT,<br>DUF4989, ANAPC8, Neur,<br>DUF5033, DUF3845,<br>DUF5003, DUF3805, Mis12,<br>DUF4984, Clavanin, DUF5035,<br>DUF4119, DUF4891,<br>DUF4627, DUF5014 |
| UP000001415 | 226185 | <i>Enterococcus</i>         | <i>faecalis</i>       | 3240 | DUF1140, Potyvirus-P3,<br>DUF632, DUF4950                                                                                                                               |
| UP000001416 | 228410 | <i>Nitrosomonas</i>         | <i>europaea</i>       | 2375 |                                                                                                                                                                         |
| UP000001424 | 243365 | <i>Chromobacterium</i>      | <i>violaceum</i>      | 4397 | stn_TNFRSF12A                                                                                                                                                           |
| UP000001436 | 267608 | <i>Ralstonia</i>            | <i>solanacearum</i>   | 5002 | F-box_4                                                                                                                                                                 |
| UP000001441 | 572477 | <i>Allochroamtium</i>       | <i>vinosum</i>        | 3211 | PTN_MK_C                                                                                                                                                                |
| UP000001453 | 525284 | <i>Gardnerella</i>          | <i>vaginalis</i>      | 1365 | Rota_NSP3, ASFV_L11L,<br>TFIIF_alpha,                                                                                                                                   |
| UP000001476 | 515620 | <i>Eubacterium</i>          | <i>eligens</i>        | 2761 | ATG_C, DUF2121, ATP-<br>synt_E,                                                                                                                                         |
| UP000001477 | 515619 | <i>Agathobacter</i>         | <i>rectalis</i>       | 3545 | Peptidase_C32, B1, DUF4818,<br>Sgf11, DUF5300, DUF5027                                                                                                                  |
| UP000001485 | 634503 | <i>Edwardsiella</i>         | <i>ictaluri</i>       | 3686 | RPN13_C                                                                                                                                                                 |
| UP000001492 | 573065 | <i>Asticcacaulis</i>        | <i>excentricus</i>    | 3743 | CYYR1, Linker_histone,<br>DUF4414, DUF1681                                                                                                                              |
| UP000001505 | 716544 | <i>Waddlia</i>              | <i>chondrophila</i>   | 1919 | DUF4680, RTT107_BRCT_6                                                                                                                                                  |
| UP000001508 | 589865 | <i>Desulfurivibrio</i>      | <i>alkaliphilus</i>   | 2595 | Nit_Regul_Hom                                                                                                                                                           |
| UP000001510 | 449447 | <i>Microcystis</i>          | <i>aeruginosa</i>     | 5981 | Sds3, DGCR6                                                                                                                                                             |
| UP000001520 | 639282 | <i>Deferribacter</i>        | <i>desulfuricans</i>  | 2338 | F-actin_cap_A, Cyclin_C_2,<br>DUP, WDCP, VGPC1_C,<br>USP7_ICP0_bdg                                                                                                      |
| UP000001551 | 663278 | <i>Ethanoligenens</i>       | <i>harbinense</i>     | 2663 |                                                                                                                                                                         |
| UP000001556 | 349161 | <i>Desulfotomaculum</i>     | <i>reducens</i>       | 3220 | Calici_MSP, Cyto_heme_lyase,<br>EF-hand_2, DUF4771                                                                                                                      |
| UP000001565 | 357244 | <i>Orientia</i>             | <i>tsutsugamushi</i>  | 966  | Mucin15, TSA, PRANC                                                                                                                                                     |
| UP000001591 | 414684 | <i>Rhodospirillum</i>       | <i>centenum</i>       | 3984 |                                                                                                                                                                         |

|             |        |                           |                        |      |                                                       |
|-------------|--------|---------------------------|------------------------|------|-------------------------------------------------------|
| UP000001601 | 398720 | <i>Leeuwenhoekiella</i>   | <i>blandensis</i>      | 3687 | SVA, DUF4216                                          |
| UP000001619 | 522306 | <i>Accumulibacter</i>     | <i>phosphatis</i>      | 4438 | KleE                                                  |
| UP000001625 | 580332 | <i>Sideroxydans</i>       | <i>lithotrophicus</i>  | 2977 |                                                       |
| UP000001635 | 880070 | <i>Cyclobacterium</i>     | <i>marinum</i>         | 4983 | DUF3112, Rabaptin, Poxvirus_B22R_N, Herpes_UL69, Yopt |
| UP000001654 | 655815 | <i>Zunongwangia</i>       | <i>profunda</i>        | 4633 | NADH_dh_m_C1, TMEM173, Suppressor_APC                 |
| UP000001660 | 330214 | <i>Nitrospira</i>         | <i>defluvii</i>        | 4263 | DUF1635                                               |
| UP000001661 | 574087 | <i>Acetohalobium</i>      | <i>arabaticum</i>      | 2276 | Radial_spoke_3                                        |
| UP000001681 | 262543 | <i>Exiguobacterium</i>    | <i>sibiricum</i>       | 3005 | Ku_N                                                  |
| UP000001683 | 457570 | <i>Natranaerobius</i>     | <i>thermophilus</i>    | 2847 | Igl_C, 7TM_GPCR_Sra, UBA_2, FANCI_S3                  |
| UP000001693 | 395495 | <i>Leptothrix</i>         | <i>cholodnii</i>       | 4343 |                                                       |
| UP000001695 | 395963 | <i>Beijerinckia</i>       | <i>indica</i>          | 3774 |                                                       |
| UP000001700 | 515618 | <i>Riesia</i>             | <i>pediculicola</i>    | 540  |                                                       |
| UP000001702 | 706191 | <i>Pantoea</i>            | <i>ananatis</i>        | 4241 |                                                       |
| UP000001726 | 338565 | <i>Erwinia</i>            | <i>tasmaniensis</i>    | 3618 | DUF5462, Myb_DNA-bind_5, DUF4370, Fimbrial_K88        |
| UP000001732 | 309798 | <i>Coprothermobacter</i>  | <i>proteolyticus</i>   | 1481 |                                                       |
| UP000001784 | 335543 | <i>Syntrophobacter</i>    | <i>fumaroxidans</i>    | 4012 | DUF4530, ATP1G1_PLM_MAT8                              |
| UP000001803 | 565034 | <i>Brachyspira</i>        | <i>hyodysenteriae</i>  | 2642 | 7TM_GPCR_Srw, DUF3447                                 |
| UP000001816 | 190650 | <i>Caulobacter</i>        | <i>crescentus</i>      | 3720 |                                                       |
| UP000001822 | 269798 | <i>Cytophaga</i>          | <i>hutchinsonii</i>    | 3771 | DUF4722, SwrA                                         |
| UP000001844 | 472759 | <i>Nitrosococcus</i>      | <i>halophilus</i>      | 3770 | Flu_NS1, Death                                        |
| UP000001868 | 450851 | <i>Phenylobacterium</i>   | <i>zucineum</i>        | 3838 |                                                       |
| UP000001870 | 314275 | <i>Alteromonas</i>        | <i>mediterranea</i>    | 3938 | DUF2664, tRNA_lig_CPD                                 |
| UP000001877 | 358681 | <i>Brevibacillus</i>      | <i>brevis</i>          | 5887 | PHR, Myofilin                                         |
| UP000001880 | 502025 | <i>Haliangium</i>         | <i>ochraceum</i>       | 6684 | MMACHC, YAF2_RYBP                                     |
| UP000001887 | 530564 | <i>Pirellula</i>          | <i>staleyii</i>        | 4711 | Gal4_dimer                                            |
| UP000001902 | 591001 | <i>Acidaminococcus</i>    | <i>fermentans</i>      | 2016 | EAGR_box, FRB_dom, DUF1358, DUF1314                   |
| UP000001908 | 644283 | <i>Micromonospora</i>     | <i>aurantiaca</i>      | 6204 | CYSYM                                                 |
| UP000001910 | 523794 | <i>Leptotrichia</i>       | <i>buccalis</i>        | 2218 | DUF2972, DUF4807, VPS13_C                             |
| UP000001916 | 526227 | <i>Meiothermus</i>        | <i>silvanus</i>        | 3383 |                                                       |
| UP000001917 | 521098 | <i>Alicyclobacillus</i>   | <i>acidocaldarius</i>  | 3059 | Peptidase_C6, TRAP-gamma                              |
| UP000001918 | 471852 | <i>Thermomonospora</i>    | <i>curvata</i>         | 4888 | EF-hand_10, Zf_RING                                   |
| UP000001919 | 446465 | <i>Brachybacterium</i>    | <i>faecium</i>         | 3062 |                                                       |
| UP000001932 | 343509 | <i>Sodalis</i>            | <i>glossinidius</i>    | 2490 | APC_u5                                                |
| UP000001933 | 56780  | <i>Syntrophus</i>         | <i>aciditrophicus</i>  | 3145 | Radial_spoke                                          |
| UP000001935 | 290397 | <i>Anaeromyxobacter</i>   | <i>dehalogenans</i>    | 4345 |                                                       |
| UP000001942 | 222891 | <i>Neorickettsia</i>      | <i>sennetsu</i>        | 932  |                                                       |
| UP000001943 | 212042 | <i>Anaplasma</i>          | <i>phagocytophilum</i> | 1330 |                                                       |
| UP000001946 | 138119 | <i>Desulfitobacterium</i> | <i>hafniense</i>       | 5014 | mRNA_stabil                                           |

|             |        |                           |                           |      |                                                  |
|-------------|--------|---------------------------|---------------------------|------|--------------------------------------------------|
| UP000001947 | 203122 | <i>Saccharophagus</i>     | <i>degradans</i>          | 3999 | TLD                                              |
| UP000001953 | 323097 | <i>Nitrobacter</i>        | <i>hamburgensis</i>       | 4243 | PVL_ORF50                                        |
| UP000001955 | 630626 | <i>Shimwellia</i>         | <i>blattae</i>            | 3870 | FIN1, Otopettrin, Imm72, Imm71                   |
| UP000001959 | 228405 | <i>Hyphomonas</i>         | <i>neptunium</i>          | 3499 | Herpes_pp38                                      |
| UP000001962 | 187272 | <i>Alkalilimnicola</i>    | <i>ehrichii</i>           | 2862 |                                                  |
| UP000001963 | 391165 | <i>Granulibacter</i>      | <i>bethesdensis</i>       | 2430 |                                                  |
| UP000001964 | 394221 | <i>Maricaulis</i>         | <i>maris</i>              | 3060 |                                                  |
| UP000001968 | 335541 | <i>Syntrophomonas</i>     | <i>wolfei</i>             | 2473 | UvsY, Siva, DUF4489, RGS                         |
| UP000001978 | 272563 | <i>Peptoclostridium</i>   | <i>difficile</i>          | 3762 | MSV199, LMWSLP_N, ErmC, DUF4624                  |
| UP000001981 | 342610 | <i>Pseudoalteromonas</i>  | <i>atlantica</i>          | 4271 | Bys1                                             |
| UP000001989 | 392499 | <i>Sphingomonas</i>       | <i>wittichii</i>          | 5313 | Glyco_hydro_61                                   |
| UP000002007 | 288705 | <i>Renibacterium</i>      | <i>salmoninarum</i>       | 3421 |                                                  |
| UP000002008 | 324602 | <i>Chloroflexus</i>       | <i>aurantiacus</i>        | 3850 | Cuticle_1, 2C_adapt, MCPVI                       |
| UP000002010 | 557598 | <i>Laribacter</i>         | <i>hongkongensis</i>      | 3208 |                                                  |
| UP000002011 | 471854 | <i>Dyadobacter</i>        | <i>fermentans</i>         | 5703 | PUB, Pox_I5, MFAP1, RP1-2                        |
| UP000002012 | 522772 | <i>Denitrovibrio</i>      | <i>acetiphilus</i>        | 2901 | MCM_OB, DUF3507                                  |
| UP000002016 | 416591 | <i>Pseudothromotoga</i>   | <i>lettingae</i>          | 2040 | zf-C2H2_aberr, Baculo_gp64                       |
| UP000002019 | 459349 | <i>Cloacimonas</i>        | <i>acidaminovorans</i>    | 1813 | DUF1390                                          |
| UP000002020 | 482235 | <i>Phytoplasma</i>        | <i>mali</i>               | 448  | Cauli_DNA-bind                                   |
| UP000002026 | 471855 | <i>Slackia</i>            | <i>heliotrinireducens</i> | 2750 | DUF2967                                          |
| UP000002027 | 479434 | <i>Sphaerobacter</i>      | <i>thermophilus</i>       | 3471 | Shal-type, DUF4449                               |
| UP000002028 | 504472 | <i>Spirosoma</i>          | <i>linguale</i>           | 6867 | Ten1_2, Aegerolysin                              |
| UP000002029 | 479432 | <i>Streptosporangium</i>  | <i>roseum</i>             | 8955 | DUF1263                                          |
| UP000002030 | 525903 | <i>Thermanaerovibrio</i>  | <i>acidaminovorans</i>    | 1737 |                                                  |
| UP000002043 | 638303 | <i>Thermocrinis</i>       | <i>albus</i>              | 1592 | DUF2226                                          |
| UP000002045 | 406818 | <i>Xenorhabdus</i>        | <i>bovienii</i>           | 4102 | DUF1139, Pico_P2B, At-tacin_C, KMP11, R_equi_Vir |
| UP000002072 | 519441 | <i>Streptobacillus</i>    | <i>moniliformis</i>       | 1431 | DUF5088                                          |
| UP000002139 | 448385 | <i>Sorangium</i>          | <i>cellulosum</i>         | 9320 | APP_Cu_bd, HARP, VirionAssem_T7, Mitoc_L55, ApeC |
| UP000002156 | 340099 | <i>Thermoanaerobacter</i> | <i>pseudethanolicus</i>   | 2193 | BDV_M                                            |
| UP000002171 | 207954 | <i>Neptuniibacter</i>     | <i>caesariensis</i>       | 3687 |                                                  |
| UP000002185 | 75379  | <i>Thiomonas</i>          | <i>intermedia</i>         | 3134 |                                                  |
| UP000002191 | 643562 | <i>Desulfovibrio</i>      | <i>aespoeensis</i>        | 3269 | CENP-C_mid, C_Hendra                             |
| UP000002192 | 203907 | <i>Blochmannia</i>        | <i>floridanus</i>         | 583  |                                                  |
| UP000002200 | 203267 | <i>Tropheryma</i>         | <i>whipplei</i>           | 805  | PI31_Prot_N, CCD, WND                            |
| UP000002204 | 234621 | <i>Rhodococcus</i>        | <i>erythropolis</i>       | 6424 | DUF4636, Bystin, DUF2744                         |
| UP000002207 | 240015 | <i>Acidobacterium</i>     | <i>capsulatum</i>         | 3363 |                                                  |
| UP000002208 | 546414 | <i>Deinococcus</i>        | <i>deserti</i>            | 3459 |                                                  |
| UP000002209 | 379066 | <i>Gemmatimonas</i>       | <i>aurantiaca</i>         | 3932 | DUF1922                                          |



|             |        |                         |                             |      |                                                     |
|-------------|--------|-------------------------|-----------------------------|------|-----------------------------------------------------|
| UP000002213 | 446462 | <i>Actinosynnema</i>    | <i>mirum</i>                | 6912 | PAXIP1_C                                            |
| UP000002215 | 485918 | <i>Chitinophaga</i>     | <i>pinensis</i>             | 7179 | DUF5048                                             |
| UP000002216 | 525897 | <i>Desulfomicrobium</i> | <i>baculatum</i>            | 3421 |                                                     |
| UP000002218 | 479431 | <i>Nakamurella</i>      | <i>multipartita</i>         | 5123 |                                                     |
| UP000002219 | 446468 | <i>Nocardiopsis</i>     | <i>dassonvillei</i>         | 5497 |                                                     |
| UP000002220 | 521674 | <i>Planctopirus</i>     | <i>limnophila</i>           | 4258 | Orai-1                                              |
| UP000002221 | 518766 | <i>Rhodothermus</i>     | <i>marinus</i>              | 2861 | Lentiviral_Tat                                      |
| UP000002222 | 525898 | <i>Sulfurospirillum</i> | <i>deleyianum</i>           | 2243 |                                                     |
| UP000002247 | 640132 | <i>Segniliparus</i>     | <i>rotundus</i>             | 3001 |                                                     |
| UP000002255 | 446471 | <i>Xylanimonas</i>      | <i>cellulosilytica</i>      | 3441 |                                                     |
| UP000002257 | 395965 | <i>Methylocella</i>     | <i>silvestris</i>           | 3816 | Neprosin_AP                                         |
| UP000002294 | 525919 | <i>Anaerococcus</i>     | <i>prevotii</i>             | 1795 | Baculo_p74, Pox_ATPase-GT                           |
| UP000002297 | 216432 | <i>Croceibacter</i>     | <i>atlanticus</i>           | 2702 | Gasdermin, Viral_Hsp90,<br>DUF5099                  |
| UP000002301 | 439375 | <i>Ochrobactrum</i>     | <i>anthropi</i>             | 4757 | DUF5086, Di19_C                                     |
| UP000002318 | 573413 | <i>Spirochaeta</i>      | <i>smaragdinae</i>          | 4211 | Phage_Gp17, PPS_PS, SUD-M                           |
| UP000002334 | 572265 | <i>Hamiltonella</i>     | <i>defensa</i>              | 2045 | DUF5311, RPS12                                      |
| UP000002349 | 552811 | <i>Dehalogenimonas</i>  | <i>lykanthroporepellens</i> | 1619 | zf-LSD1, SPP                                        |
| UP000002360 | 688245 | <i>Comamonas</i>        | <i>testosteroni</i>         | 4780 | BES1_N, Zein                                        |
| UP000002361 | 272942 | <i>Rhodobacter</i>      | <i>capsulatus</i>           | 3632 |                                                     |
| UP000002366 | 572547 | <i>Aminobacterium</i>   | <i>colombiense</i>          | 1872 |                                                     |
| UP000002368 | 562970 | <i>Kyrpidia</i>         | <i>tusciae</i>              | 3135 |                                                     |
| UP000002377 | 635013 | <i>Thermincola</i>      | <i>potens</i>               | 2908 |                                                     |
| UP000002382 | 521045 | <i>Kosmotoga</i>        | <i>olearia</i>              | 2087 |                                                     |
| UP000002383 | 396588 | <i>Thioalkalivibrio</i> | <i>sulfidiphilus</i>        | 3272 | Herpes_U30                                          |
| UP000002402 | 246197 | <i>Myxococcus</i>       | <i>xanthus</i>              | 7314 |                                                     |
| UP000002415 | 381764 | <i>Fervidobacterium</i> | <i>nodosum</i>              | 1725 | Flt3_lig                                            |
| UP000002417 | 78245  | <i>Xanthobacter</i>     | <i>autotrophicus</i>        | 4971 |                                                     |
| UP000002424 | 322710 | <i>Azotobacter</i>      | <i>vinelandii</i>           | 4990 |                                                     |
| UP000002427 | 374463 | <i>Baumannia</i>        | <i>cicadellinicola</i>      | 595  |                                                     |
| UP000002429 | 266264 | <i>Cupriavidus</i>      | <i>metallidurans</i>        | 6364 | DUF2880, NEMP, CnrY                                 |
| UP000002430 | 363253 | <i>Lawsonia</i>         | <i>intracellularis</i>      | 1342 |                                                     |
| UP000002432 | 204669 | <i>Koribacter</i>       | <i>versatilis</i>           | 4771 | Endomucin, BCS1_N                                   |
| UP000002440 | 265072 | <i>Methylobacillus</i>  | <i>flagellatus</i>          | 2609 |                                                     |
| UP000002480 | 272947 | <i>Rickettsia</i>       | <i>prowazekii</i>           | 834  | rOmpB, RP854, DUF2673,<br>DUF2671, DUF2532, DUF2706 |
| UP000002514 | 243265 | <i>Photorhabdus</i>     | <i>luminescens</i>          | 4556 | Adeno_shaft                                         |
| UP000002523 | 262768 | <i>Onion</i>            | <i>yellow</i>               | 730  | Mre11_DNA_bind, Phyto-Amp                           |
| UP000002526 | 224911 | <i>Bradyrhizobium</i>   | <i>diazoefficiens</i>       | 8253 |                                                     |
| UP000002528 | 335992 | <i>Pelagibacter</i>     | <i>ubique</i>               | 1354 | IZUMO                                               |

|             |         |                           |                              |      |                                                                                     |
|-------------|---------|---------------------------|------------------------------|------|-------------------------------------------------------------------------------------|
| UP000002534 | 338963  | <i>Pelobacter</i>         | <i>carbinolicus</i>          | 3292 | Cauli_AT, Caveolin                                                                  |
| UP000002569 | 668336  | <i>Aggregatibacter</i>    | <i>actinomycetemcomitans</i> | 2276 | LktC, Abp2                                                                          |
| UP000002572 | 653733  | <i>Desulfurispirillum</i> | <i>indicum</i>               | 2551 | Exo70                                                                               |
| UP000002574 | 608538  | <i>Hydrogenobacter</i>    | <i>thermophilus</i>          | 1892 | CKS                                                                                 |
| UP000002586 | 156889  | <i>Magnetococcus</i>      | <i>marinus</i>               | 3594 | PRP4, Adeno_E4_ORF3                                                                 |
| UP000002587 | 413404  | <i>Ruthia</i>             | <i>magnifica</i>             | 976  |                                                                                     |
| UP000002596 | 397945  | <i>Acidovorax</i>         | <i>citrulli</i>              | 4602 | Peptidase_C27, Herpes LAMP2                                                         |
| UP000002620 | 429009  | <i>Ammonifex</i>          | <i>degensii</i>              | 2077 |                                                                                     |
| UP000002663 | 945021  | <i>Tetragenococcus</i>    | <i>halophilus</i>            | 2507 | BSMAP, SAC3, UPF0552                                                                |
| UP000002671 | 227377  | <i>Coxiella</i>           | <i>burnetii</i>              | 1815 | Thyroglobulin_1, Tegument_dsDNA, Cyclin_N, Cyclin, DUF807, DUF762, DUF1601, DUF1658 |
| UP000002696 | 633149  | <i>Brevundimonas</i>      | <i>subvibrioides</i>         | 3326 | CRA_rpt, Herpes_TAF50                                                               |
| UP000002706 | 246194  | <i>Carboxydotherrhus</i>  | <i>hydrogenoformans</i>      | 2615 | UBD, DUF4803                                                                        |
| UP000002713 | 317025  | <i>Thiomicrospira</i>     | <i>crunogena</i>             | 2187 | DUF2120, NARG2_C                                                                    |
| UP000002714 | 326298  | <i>Sulfurimonas</i>       | <i>denitrificans</i>         | 2084 | Aida_C2, DUF4535, VIR_N                                                             |
| UP000002716 | 300267  | <i>Shigella</i>           | <i>dysenteriae</i>           | 3897 | DUF826, SLT_beta, MxiM, Nse5, DUF3927                                               |
| UP000002717 | 1140    | <i>Synechococcus</i>      | <i>elongatus</i>             | 2657 | Ufm1, Vac17                                                                         |
| UP000002718 | 323848  | <i>Nitrospira</i>         | <i>multiformis</i>           | 2732 | CCDC32                                                                              |
| UP000002719 | 359391  | <i>Bruceella</i>          | <i>abortus</i>               | 3022 |                                                                                     |
| UP000002724 | 324925  | <i>Pelodictyon</i>        | <i>phaeoclathratiforme</i>   | 2685 |                                                                                     |
| UP000002725 | 290512  | <i>Prosthecochloris</i>   | <i>aestuarii</i>             | 2319 |                                                                                     |
| UP000002741 | 573234  | <i>Hodgkinia</i>          | <i>cicadicola</i>            | 169  |                                                                                     |
| UP000002743 | 582744  | <i>Methylovorus</i>       | <i>glucosetrophus</i>        | 2907 | HAP2-GCS1, TLV_coat, CAF1                                                           |
| UP000002745 | 582402  | <i>Hirschia</i>           | <i>baltica</i>               | 3187 | Death_2                                                                             |
| UP000002774 | 714943  | <i>Mucilaginibacter</i>   | <i>paludis</i>               | 6864 | Caud_tail_N, Limkain-b1, SPAN-X, MRP-S33                                            |
| UP000002875 | 929562  | <i>Emticicia</i>          | <i>oligotrophica</i>         | 4251 | Putative_CCL4, fn3_4, Hema_esterase, Uso1 p115 head, SAWADEE                        |
| UP000002881 | 660470  | <i>Mesotoga</i>           | <i>prima</i>                 | 2499 |                                                                                     |
| UP000002892 | 646529  | <i>Desulfosporosinus</i>  | <i>acidiphilus</i>           | 4469 | DUF1677                                                                             |
| UP000002914 | 391619  | <i>Phaeobacter</i>        | <i>inhibens</i>              | 3853 | Talin_middle                                                                        |
| UP000002931 | 314271  | <i>Maritimibacter</i>     | <i>alkaliphilus</i>          | 4692 |                                                                                     |
| UP000002938 | 702450  | <i>Turicibacter</i>       | <i>sanguinis</i>             | 2779 | WBP-1                                                                               |
| UP000002939 | 626369  | <i>Granulicatella</i>     | <i>elegans</i>               | 1562 | RPM2                                                                                |
| UP000002941 | 1125718 | <i>Actinomyces</i>        | <i>massiliensis</i>          | 3129 |                                                                                     |
| UP000002945 | 391587  | <i>Kordia</i>             | <i>algicida</i>              | 4477 | GCR1_C, US22, Interferon, ypmT, Squash, Ribosomal L37e                              |
| UP000002949 | 1082933 | <i>Mesorhizobium</i>      | <i>amorphae</i>              | 7083 | DUF4467, vMSA, CLLAC                                                                |
| UP000002975 | 469605  | <i>Fusobacterium</i>      | <i>gonidiaformans</i>        | 1890 |                                                                                     |
| UP000003009 | 629741  | <i>Kingella</i>           | <i>oralis</i>                | 3160 | APIAR, AIM3                                                                         |

|             |         |                             |                           |      |                                                                     |
|-------------|---------|-----------------------------|---------------------------|------|---------------------------------------------------------------------|
| UP000003011 | 679200  | <i>Johnsonella</i>          | <i>ignava</i>             | 2284 | DUF2373, RBR                                                        |
| UP000003045 | 871571  | <i>Mobiluncus</i>           | <i>mulieris</i>           | 2379 |                                                                     |
| UP000003053 | 313594  | <i>Polaribacter</i>         | <i>irgensii</i>           | 2556 | Hid1, MSP7_C, FACT-Spt16_Nlob, Exo84_C                              |
| UP000003058 | 765914  | <i>Thiorhodospira</i>       | <i>sibirica</i>           | 2933 | DUF3591                                                             |
| UP000003087 | 344747  | <i>Gimesia</i>              | <i>maris</i>              | 6463 | Solute_trans_a, Glutenin_hmw, DUF1154, Paralemmin, Sec16_C, DUF4576 |
| UP000003111 | 585531  | <i>Aeromicrobium</i>        | <i>marinum</i>            | 3077 | DUF5073                                                             |
| UP000003195 | 706434  | <i>Megasphaera</i>          | <i>micronuciformis</i>    | 1771 | DUF4704                                                             |
| UP000003226 | 1163407 | <i>Rhodanobacter</i>        | <i>spathiphylli</i>       | 3438 | FAM27                                                               |
| UP000003240 | 1009370 | <i>Acetonema</i>            | <i>longum</i>             | 4283 | Miga, Pheromone                                                     |
| UP000003244 | 596315  | <i>Peptostreptococcus</i>   | <i>stomatis</i>           | 1600 |                                                                     |
| UP000003254 | 471875  | <i>Ruminococcus</i>         | <i>lactaris</i>           | 2706 | NCD1, TNF                                                           |
| UP000003257 | 391624  | <i>Oceanibulbus</i>         | <i>indolifex</i>          | 4147 |                                                                     |
| UP000003277 | 742743  | <i>Dialister</i>            | <i>succinatiphilus</i>    | 2140 | Peptidase_C41                                                       |
| UP000003280 | 862517  | <i>Peptoniphilus</i>        | <i>duerdenii</i>          | 1987 | DUF4528, P2X_receptor                                               |
| UP000003295 | 521003  | <i>Collinsella</i>          | <i>intestinalis</i>       | 1783 |                                                                     |
| UP000003374 | 314278  | <i>Nitrococcus</i>          | <i>mobilis</i>            | 3484 | Med12-LCEWAV, TOM_sub5, XK-related                                  |
| UP000003438 | 411471  | <i>Subdoligranulum</i>      | <i>variabile</i>          | 3378 | GP11, ANAPC1                                                        |
| UP000003460 | 626522  | <i>Alloprevotella</i>       | <i>tannerae</i>           | 2806 |                                                                     |
| UP000003494 | 626523  | <i>Shuttleworthia</i>       | <i>satelles</i>           | 2247 | UNC-50, zf-DNL                                                      |
| UP000003544 | 1026882 | <i>Methylophaga</i>         | <i>aminisulfidivorans</i> | 3174 | RNA_poll_A34, Saw1                                                  |
| UP000003586 | 929713  | <i>Niabella</i>             | <i>solis</i>              | 4110 | KIX, CRAL_TRIO, Peptidase_A2B                                       |
| UP000003599 | 883103  | <i>Dolosigranulum</i>       | <i>pigrum</i>             | 1691 |                                                                     |
| UP000003635 | 314256  | <i>Oceanicola</i>           | <i>granulosus</i>         | 3791 |                                                                     |
| UP000003639 | 411467  | <i>Pseudoflavonifractor</i> | <i>capillosus</i>         | 4804 | RNA_pol_inhib, DUF5022                                              |
| UP000003671 | 500635  | <i>Mitsuokella</i>          | <i>multacida</i>          | 2558 |                                                                     |
| UP000003688 | 320771  | <i>Pedosphaera</i>          | <i>parvula</i>            | 6492 | DUF3506                                                             |
| UP000003701 | 585503  | <i>Selenomonas</i>          | <i>noxia</i>              | 2020 |                                                                     |
| UP000003704 | 1172194 | <i>Hydrocarboniphaga</i>    | <i>effusa</i>             | 4474 |                                                                     |
| UP000003730 | 1046627 | <i>Bizionia</i>             | <i>argentinensis</i>      | 3095 | LAX, DUF3211, Got1, DUF313                                          |
| UP000003764 | 655812  | <i>Aerococcus</i>           | <i>viridans</i>           | 1929 | DUF4741, Flavi_NS1                                                  |
| UP000003803 | 445972  | <i>Anaerotruncus</i>        | <i>colihominis</i>        | 4421 | Tri3, RTTN_N                                                        |
| UP000003806 | 885272  | <i>Jonquetella</i>          | <i>anthropi</i>           | 1508 |                                                                     |
| UP000003835 | 118168  | <i>Coleofasciculus</i>      | <i>chthonoplastes</i>     | 8193 | DUF3741, Methyltransf_34                                            |
| UP000003844 | 865937  | <i>Gillisia</i>             | <i>limnaea</i>            | 3411 | ATP-synt_S1                                                         |
| UP000003900 | 1131935 | <i>Paenibacillus</i>        | <i>dendritiformis</i>     | 5660 | Tox-HNH-HHH, Phage Gp111, Curto_V3                                  |
| UP000003919 | 388413  | <i>Algoriphagus</i>         | <i>machipongonensis</i>   | 3932 | Ninjurin                                                            |
| UP000003922 | 165597  | <i>Crocospaera</i>          | <i>watsonii</i>           | 5659 | Kinetocho_Slk19, USP7_C2, PI3K_1B_p101                              |

|             |         |                         |                          |       |                                                                     |
|-------------|---------|-------------------------|--------------------------|-------|---------------------------------------------------------------------|
| UP000003947 | 864069  | <i>Microvirga</i>       | <i>lotoononidis</i>      | 6918  |                                                                     |
| UP000003959 | 489825  | <i>Moorea</i>           | <i>producens</i>         | 7382  | BDV_G, ELYS, PMG                                                    |
| UP000004057 | 570509  | <i>Spiroplasma</i>      | <i>melliferum</i>        | 1154  | Spiralin, DUF2649, DUF3688                                          |
| UP000004095 | 313606  | <i>Microscilla</i>      | <i>marina</i>            | 8248  | DUF2415, Coagulase,<br>CRM1_C                                       |
| UP000004097 | 706433  | <i>Solobacterium</i>    | <i>moorei</i>            | 2034  | ALG11_N, ATG19_autophagy                                            |
| UP000004121 | 585501  | <i>Oribacterium</i>     | <i>sinus</i>             | 2638  | PAP_assoc,<br>Phage_T4_Gp30_7, 7tm_6                                |
| UP000004165 | 910954  | <i>Dietzia</i>          | <i>cinnamea</i>          | 3537  | DUF3534                                                             |
| UP000004169 | 1150626 | <i>Phaeospirillum</i>   | <i>molischianum</i>      | 3771  | PA28_alpha, Spike_rec_bind                                          |
| UP000004191 | 883114  | <i>Helcococcus</i>      | <i>kunzii</i>            | 1876  | IBD, MIEAP, Pneumovirus_M2                                          |
| UP000004200 | 765913  | <i>Thiorhodococcus</i>  | <i>drewsii</i>           | 4731  |                                                                     |
| UP000004221 | 1129897 | <i>Nitrolancea</i>      | <i>hollandica</i>        | 3969  | Nic96, Herpes_UL16                                                  |
| UP000004263 | 207949  | <i>Bermanella</i>       | <i>marisrubri</i>        | 3303  | DUF630                                                              |
| UP000004291 | 411684  | <i>Hoeflea</i>          | <i>phototrophica</i>     | 4185  | U3_assoc_6                                                          |
| UP000004310 | 314231  | <i>Fulvimarina</i>      | <i>pelagi</i>            | 3739  | Flavi_NS2A                                                          |
| UP000004315 | 518637  | <i>Holdemanela</i>      | <i>biformis</i>          | 2528  | Seadorna_Vp10, Sta-<br>phostatin_A, TAS2R, BRE,<br>TERB2_Cas1_AcylT |
| UP000004324 | 1149862 | <i>Pelosinus</i>        | <i>fermentans</i>        | 4690  | FPL, SRecog, Pho86, Opy2,<br>SepZ                                   |
| UP000004358 | 314230  | <i>Blastopirellula</i>  | <i>marina</i>            | 6010  | Biliv-reduc_cat, Comm                                               |
| UP000004367 | 1089455 | <i>Mobilicoccus</i>     | <i>pelagius</i>          | 3112  |                                                                     |
| UP000004374 | 562729  | <i>Rheinheimera</i>     | <i>nanhaiensis</i>       | 3730  |                                                                     |
| UP000004459 | 411475  | <i>Flavonifractor</i>   | <i>plautii</i>           | 4278  | PRA1                                                                |
| UP000004465 | 883111  | <i>Facklamia</i>        | <i>hominis</i>           | 1717  |                                                                     |
| UP000004474 | 1210046 | <i>Janibacter</i>       | <i>hoylei</i>            | 3070  | Coatamer_beta_C                                                     |
| UP000004478 | 1225176 | <i>Cecembia</i>         | <i>lonarensis</i>        | 4213  | Gp67                                                                |
| UP000004507 | 314232  | <i>Loktanella</i>       | <i>vestfoldensis</i>     | 3061  |                                                                     |
| UP000004508 | 485913  | <i>Ktedonobacter</i>    | <i>racemifer</i>         | 11211 | zf-TFIIC, DUF3723, S6OS1,<br>UPF0715, DUF1917, Toxin_27             |
| UP000004510 | 742159  | <i>Achromobacter</i>    | <i>piechaudii</i>        | 5755  |                                                                     |
| UP000004528 | 585506  | <i>Weissella</i>        | <i>paramesenteroides</i> | 1952  | UPF0193, TMEM37,<br>L_lactis_RepB_C                                 |
| UP000004547 | 1160710 | <i>Microbacterium</i>   | <i>laevaniformans</i>    | 3249  | DUF1725, POT1PC, SRF-TF,<br>DUF3295                                 |
| UP000004619 | 411483  | <i>Faecalibacterium</i> | <i>prausnitzii</i>       | 3472  | Flavi_M, Med29                                                      |
| UP000004622 | 1189611 | <i>Nitratireductor</i>  | <i>aquibiodomus</i>      | 4240  |                                                                     |
| UP000004664 | 697282  | <i>Methylobacter</i>    | <i>tundripaludum</i>     | 4194  | GIT_SHD                                                             |
| UP000004671 | 880073  | <i>Caldithrix</i>       | <i>abyssi</i>            | 3674  | SLS, DUF4481, GAGA                                                  |
| UP000004685 | 575590  | <i>Bacteroidetes</i>    | <i>oral</i>              | 1854  | Imm12                                                               |
| UP000004690 | 926559  | <i>Joostella</i>        | <i>marina</i>            | 3783  | UPF0228, DUF4570                                                    |
| UP000004699 | 565045  | <i>Luminiphilus</i>     | <i>syltensis</i>         | 2923  | DUF1668                                                             |
| UP000004703 | 244592  | <i>Labrenzia</i>        | <i>alexandrii</i>        | 5363  |                                                                     |
| UP000004728 | 983920  | <i>Novosphingobium</i>  | <i>nitrogenifigens</i>   | 3800  | DUF3767, T4_gp9_10                                                  |

|             |         |                              |                          |      |                                        |
|-------------|---------|------------------------------|--------------------------|------|----------------------------------------|
| UP000004750 | 797473  | <i>Cardiobacterium</i>       | <i>valvarum</i>          | 3026 |                                        |
| UP000004754 | 887929  | <i>Pseudoramibacter</i>      | <i>alactolyticus</i>     | 2514 |                                        |
| UP000004793 | 511051  | <i>Caldisericum</i>          | <i>exile</i>             | 1566 |                                        |
| UP000004913 | 742766  | <i>Dysgonomonas</i>          | <i>gadei</i>             | 4153 | Baculo_LEF-3, DUF5040                  |
| UP000004923 | 626939  | <i>Phascolarctobacterium</i> | <i>succinatutens</i>     | 2148 | Mlh1_C, TMem95                         |
| UP000004946 | 864564  | <i>Parascardovia</i>         | <i>denticolens</i>       | 1679 |                                        |
| UP000004947 | 313628  | <i>Lentisphaera</i>          | <i>araneosa</i>          | 4982 | Thoc2, Cys_knot, DUF682, Ubiquitin_3   |
| UP000004956 | 762967  | <i>Sutterella</i>            | <i>parvirubra</i>        | 2483 |                                        |
| UP000004968 | 566550  | <i>Hungatella</i>            | <i>hathewayi</i>         | 7571 | RasGEF_N_2, SURF6, TBD                 |
| UP000005017 | 679192  | <i>Bulleidia</i>             | <i>extracta</i>          | 1415 |                                        |
| UP000005019 | 1000565 | <i>Methyloversatilis</i>     | <i>universalis</i>       | 3919 | DUF247, Aim21, Pea-VEAcid              |
| UP000005089 | 556269  | <i>Oxalobacter</i>           | <i>formigenes</i>        | 2076 | SWIRM-assoc_3, CIDE-N                  |
| UP000005090 | 686340  | <i>Methylomicrobium</i>      | <i>album</i>             | 3738 | XRCC1_N                                |
| UP000005096 | 584708  | <i>Aminomonas</i>            | <i>paucivorans</i>       | 2391 |                                        |
| UP000005139 | 401526  | <i>Thermosinus</i>           | <i>carboxydivorans</i>   | 2738 | Reo_sigma1, Cript                      |
| UP000005143 | 1097667 | <i>Patulibacter</i>          | <i>medicamentivorans</i> | 4372 | DUF4536                                |
| UP000005178 | 445971  | <i>Anaerofustis</i>          | <i>stercorihominis</i>   | 2331 | AsiA, UFC1, DUF3959, DHHC              |
| UP000005219 | 693746  | <i>Oscillibacter</i>         | <i>valericigenes</i>     | 4593 | zf-UDP, Asp_Glu_race_2, zf-C2H2_jaz    |
| UP000005234 | 767434  | <i>Frateuria</i>             | <i>aurantia</i>          | 3098 |                                        |
| UP000005258 | 1110502 | <i>Tistrella</i>             | <i>mobilis</i>           | 5778 | DUF4078                                |
| UP000005267 | 1036672 | <i>Advenella</i>             | <i>kashmirensis</i>      | 3933 | CCDC158                                |
| UP000005275 | 765910  | <i>Marichromatium</i>        | <i>purpuratum</i>        | 3249 |                                        |
| UP000005297 | 314345  | <i>Mariprofundus</i>         | <i>ferrooxydans</i>      | 2856 | RexB, Varsurf_PPLC                     |
| UP000005307 | 391626  | <i>Octadecabacter</i>        | <i>antarcticus</i>       | 4327 | PBP_GOBP                               |
| UP000005316 | 1027292 | <i>Sporosarcina</i>          | <i>newyorkensis</i>      | 3825 | Peptidase_A22B, CC2-LZ                 |
| UP000005317 | 870187  | <i>Thiothrix</i>             | <i>nivea</i>             | 4218 | Fea1, MRP-S27, Phage-tail_1, UL11      |
| UP000005324 | 525371  | <i>Roseomonas</i>            | <i>cervicalis</i>        | 4774 |                                        |
| UP000005380 | 717772  | <i>Thioalkalimicrobium</i>   | <i>aerophilum</i>        | 2067 |                                        |
| UP000005436 | 203275  | <i>Tannerella</i>            | <i>forsythia</i>         | 2978 | CBX7_C, DUF1147                        |
| UP000005438 | 700598  | <i>Niastella</i>             | <i>koreensis</i>         | 7171 | Gal_GalNac_35kD, DUF4283, RINT1_TIP1   |
| UP000005459 | 768671  | <i>Thiocapsa</i>             | <i>marina</i>            | 4915 |                                        |
| UP000005481 | 861450  | <i>Anaeroglobus</i>          | <i>geminatus</i>         | 2148 | Ant_C, Herpes_UL79, DNA Polymerase Pol |
| UP000005496 | 555779  | <i>Desulfonatronospira</i>   | <i>thiodismutans</i>     | 3577 | XPA_C, DUF684                          |
| UP000005551 | 1189621 | <i>Nitritalea</i>            | <i>halalkaliphila</i>    | 3102 | DUF4577                                |
| UP000005561 | 478749  | <i>Marvinbryantia</i>        | <i>formatexigens</i>     | 4894 | Nod1, DUF5038, Nop                     |
| UP000005566 | 1086011 | <i>Flavobacterium</i>        | <i>frigoris</i>          | 3590 | T4_Gp59_N                              |
| UP000005631 | 926562  | <i>Owenweeksia</i>           | <i>hongkongensis</i>     | 3471 | DUF1160, DUF5098, COG4                 |
| UP000005632 | 158190  | <i>Sphaerochaeta</i>         | <i>pleomorpha</i>        | 3150 | MTABC_N                                |

|             |         |                          |                       |      |                                              |
|-------------|---------|--------------------------|-----------------------|------|----------------------------------------------|
| UP000005633 | 640081  | <i>Dechlorosoma</i>      | <i>suillum</i>        | 3432 | SOCS                                         |
| UP000005667 | 862719  | <i>Azospirillum</i>      | <i>lipoferum</i>      | 6062 |                                              |
| UP000005695 | 281689  | <i>Desulfuromonas</i>    | <i>acetoxidans</i>    | 3204 | bZIP_Maf                                     |
| UP000005707 | 1033810 | <i>Haloplasma</i>        | <i>contractile</i>    | 3019 | Nairo_nucleo, MNSV_P7B                       |
| UP000005713 | 388399  | <i>Sagittula</i>         | <i>stellata</i>       | 5025 | TORC_C, Tox-WTIP                             |
| UP000005714 | 585530  | <i>Brevibacterium</i>    | <i>mcbrellneri</i>    | 2432 | Ost4, DUF4690                                |
| UP000005737 | 929563  | <i>Leptonema</i>         | <i>illini</i>         | 4129 | CTD                                          |
| UP000005744 | 395493  | <i>Beggiatoa</i>         | <i>alba</i>           | 3440 | DUF2112                                      |
| UP000005777 | 641146  | <i>Scardovia</i>         | <i>inopinata</i>      | 1482 |                                              |
| UP000005778 | 879212  | <i>Desulfobacter</i>     | <i>postgatei</i>      | 3396 | Rotavirus_VP3, PIG-Y, Ribosomal L24e         |
| UP000005785 | 929704  | <i>Myroides</i>          | <i>odoratus</i>       | 3687 | Myosin-VI_CBD, LOB, IES5, RILP               |
| UP000005801 | 391625  | <i>Plesiocystis</i>      | <i>pacifica</i>       | 8437 | DUF2150, DUF569, FAM222A, DUF538             |
| UP000005824 | 497964  | <i>Chthoniobacter</i>    | <i>flavus</i>         | 6705 |                                              |
| UP000005837 | 546274  | <i>Eikenella</i>         | <i>corrodens</i>      | 2627 |                                              |
| UP000005868 | 580340  | <i>Thermovirga</i>       | <i>lienii</i>         | 1853 |                                              |
| UP000005870 | 1045855 | <i>Pseudoxanthomonas</i> | <i>spadix</i>         | 3147 | Miff, Dermcidin                              |
| UP000005938 | 946077  | <i>Imtechella</i>        | <i>halotolerans</i>   | 2694 | TMEM237, SP24, F_actin_bind                  |
| UP000005939 | 1088868 | <i>Commensalibacter</i>  | <i>intestini</i>      | 2209 | Circo_capsid, Trs65                          |
| UP000005950 | 545696  | <i>Holdemania</i>        | <i>fliformis</i>      | 4221 | FTA4, Cullin_Nedd8, Auxin_inducible, UPF0172 |
| UP000005952 | 670307  | <i>Hypomicrobium</i>     | <i>denitrificans</i>  | 3832 | SSV1_ORF_D-335, DUF4677                      |
| UP000005953 | 314283  | <i>Reinekea</i>          | <i>blandensis</i>     | 4236 | DUF382, GPHR_N                               |
| UP000005954 | 89187   | <i>Roseovarius</i>       | <i>nubinhbens</i>     | 3545 |                                              |
| UP000005990 | 908337  | <i>Eremococcus</i>       | <i>coleocola</i>      | 1720 | mit_SMPDase                                  |
| UP000006004 | 546270  | <i>Gemella</i>           | <i>haemolysans</i>    | 1709 | RSB_motif, EIF_2_alpha                       |
| UP000006008 | 742725  | <i>Alistipes</i>         | <i>indistinctus</i>   | 2348 |                                              |
| UP000006034 | 563192  | <i>Bilophila</i>         | <i>wadsworthia</i>    | 3779 |                                              |
| UP000006048 | 869212  | <i>Turneriella</i>       | <i>parva</i>          | 4092 | PRELI                                        |
| UP000006049 | 746697  | <i>Aequorivita</i>       | <i>sublithicola</i>   | 3134 | Rav1p_C                                      |
| UP000006050 | 866536  | <i>Belliella</i>         | <i>baltica</i>        | 3609 | Muskelin_N                                   |
| UP000006051 | 867902  | <i>Ornithobacterium</i>  | <i>rhinotracheale</i> | 2138 | PMC2NT, DUF241, Ac110_PIF                    |
| UP000006054 | 880071  | <i>Flexibacter</i>       | <i>litoralis</i>      | 3832 | DUF1179, DUF4464, PIG-X, WCOR413             |
| UP000006055 | 706587  | <i>Desulfomonile</i>     | <i>tiedjei</i>        | 5412 | End_beta_barrel, CDC73_N                     |
| UP000006056 | 926566  | <i>Terriglobus</i>       | <i>roseus</i>         | 3936 |                                              |
| UP000006061 | 891968  | <i>Anaerobaculum</i>     | <i>mobile</i>         | 2004 |                                              |
| UP000006062 | 765911  | <i>Thiocystis</i>        | <i>violascens</i>     | 4192 |                                              |
| UP000006073 | 1189612 | <i>Indibacter</i>        | <i>alkaliphilus</i>   | 4650 | Rhabdo_ncap                                  |
| UP000006078 | 883169  | <i>Turicella</i>         | <i>otitidis</i>       | 1846 |                                              |
| UP000006085 | 883096  | <i>Bergeyella</i>        | <i>zoohelcum</i>      | 2120 | Nuf2, FAM86, DGF-1_5, DUF643                 |

|             |         |                               |                          |      |                                                 |
|-------------|---------|-------------------------------|--------------------------|------|-------------------------------------------------|
| UP000006138 | 713604  | <i>Amycolatopsis</i>          | <i>mediterranei</i>      | 9551 | DUF1218, DUF5506, RHIM                          |
| UP000006177 | 1048260 | <i>Leptospirillum</i>         | <i>ferriphilum</i>       | 2450 |                                                 |
| UP000006178 | 1094508 | <i>Thermoanaerobacterium</i>  | <i>saccharolyticum</i>   | 2778 | Zea_mays_MuDR, Tom6                             |
| UP000006230 | 314265  | <i>Pelagibaca</i>             | <i>bermudensis</i>       | 5420 |                                                 |
| UP000006242 | 1033802 | <i>Salinisphaera</i>          | <i>shabanensis</i>       | 3524 |                                                 |
| UP000006258 | 525373  | <i>Sphingobacterium</i>       | <i>spiritivorum</i>      | 4471 | Imm25, Ints3, Imm19                             |
| UP000006276 | 1228997 | <i>Riemerella</i>             | <i>anatipestifer</i>     | 2187 |                                                 |
| UP000006281 | 1179773 | <i>Saccharothrix</i>          | <i>espanaensis</i>       | 8423 |                                                 |
| UP000006286 | 930169  | <i>Alcanivorax</i>            | <i>dieselolei</i>        | 4388 | EFF-AFF                                         |
| UP000006294 | 698758  | <i>Amphibacillus</i>          | <i>xylanus</i>           | 2384 |                                                 |
| UP000006304 | 1133849 | <i>Nocardia</i>               | <i>brasiliensis</i>      | 8414 | Totivirus_coat                                  |
| UP000006327 | 493475  | <i>Paraglaciecola</i>         | <i>arctica</i>           | 5330 | Calc_CGRP_IAPP                                  |
| UP000006334 | 1127673 | <i>Aliiglaciecola</i>         | <i>lipolytica</i>        | 4327 | Pneumo_phosprot                                 |
| UP000006362 | 648996  | <i>Thermovibrio</i>           | <i>ammonificans</i>      | 1812 |                                                 |
| UP000006365 | 577650  | <i>Desulfobulbus</i>          | <i>propionicus</i>       | 3259 | NAD4L, DUF2043, DUF2368                         |
| UP000006375 | 290633  | <i>Gluconobacter</i>          | <i>oxydans</i>           | 2626 | Nha1_C                                          |
| UP000006377 | 402881  | <i>Parvibaculum</i>           | <i>lavamentivorans</i>   | 3580 |                                                 |
| UP000006427 | 469381  | <i>Dethiosulfovibrio</i>      | <i>peptidovorans</i>     | 2432 | DUF4506                                         |
| UP000006443 | 555088  | <i>Dethiobacter</i>           | <i>alkaliphilus</i>      | 3162 | DNA_Packaging_2                                 |
| UP000006461 | 1144889 | <i>Modestobacter</i>          | <i>marinus</i>           | 5435 | DUF1412                                         |
| UP000006462 | 352165  | <i>Pyramidobacter</i>         | <i>piscolens</i>         | 2755 |                                                 |
| UP000006464 | 471881  | <i>Proteus</i>                | <i>penneri</i>           | 4909 |                                                 |
| UP000006468 | 714995  | <i>Komagataeibacter</i>       | <i>hansenii</i>          | 3303 | ISK_Channel, CBP_CCPA                           |
| UP000006552 | 76114   | <i>Aromatoleum</i>            | <i>aromaticum</i>        | 4483 | DUF4758, Phenyl_P_gamma, DUF5457                |
| UP000006556 | 370438  | <i>Pelotomaculum</i>          | <i>thermopropionicum</i> | 2884 |                                                 |
| UP000006578 | 317655  | <i>Sphingopyxis</i>           | <i>alaskensis</i>        | 3184 | Peptidase_S21                                   |
| UP000006583 | 795359  | <i>Thermodesulfobacterium</i> | <i>geofontis</i>         | 1594 | Ydc2-catalyt, DUF3535, zf-RING_4, Pox_A30L_A26L |
| UP000006589 | 426355  | <i>Methylobacterium</i>       | <i>radiotolerans</i>     | 6388 | DUF1005                                         |
| UP000006621 | 717231  | <i>Flexistipes</i>            | <i>sinusarabici</i>      | 2185 | Flu_NP, DUF4888, BLI1, zf-P11                   |
| UP000006633 | 639283  | <i>Starkeya</i>               | <i>novella</i>           | 4424 |                                                 |
| UP000006637 | 266117  | <i>Rubrobacter</i>            | <i>xylanophilus</i>      | 3127 | RE_Alw26IDE                                     |
| UP000006639 | 696127  | <i>Midichloria</i>            | <i>mitochondrii</i>      | 1181 | DUF2733                                         |
| UP000006640 | 469371  | <i>Thermobispora</i>          | <i>bispora</i>           | 3545 |                                                 |
| UP000006647 | 265311  | <i>Mesoplasma</i>             | <i>florum</i>            | 683  |                                                 |
| UP000006650 | 521097  | <i>Capnocytophaga</i>         | <i>ochracea</i>          | 2171 | Med20, DUF2152                                  |
| UP000006657 | 709991  | <i>Odoribacter</i>            | <i>splanchnicus</i>      | 3479 | Bcl-2_3, Enkurin                                |
| UP000006666 | 478801  | <i>Kytococcus</i>             | <i>sedentarius</i>       | 2531 | Herpes_ICP4_N, KHA                              |
| UP000006683 | 550540  | <i>Ferrimonas</i>             | <i>balearica</i>         | 3781 |                                                 |

|             |         |                            |                           |      |                                                  |
|-------------|---------|----------------------------|---------------------------|------|--------------------------------------------------|
| UP000006691 | 1002809 | <i>Solibacillus</i>        | <i>silvestris</i>         | 3812 | DUF3759, Colicin_K, ApoC-I                       |
| UP000006697 | 204773  | <i>Herminiimonas</i>       | <i>arsenicoxydans</i>     | 3272 | Orthopox_A47                                     |
| UP000006728 | 405948  | <i>Saccharopolyspora</i>   | <i>erythraea</i>          | 7154 |                                                  |
| UP000006746 | 1207063 | <i>Oceanibaculum</i>       | <i>indicum</i>            | 3754 | TMEM206                                          |
| UP000006755 | 745411  | <i>Gallaecimonas</i>       | <i>xiamenensis</i>        | 3798 |                                                  |
| UP000006762 | 1208323 | <i>Celeribacter</i>        | <i>baekdonensis</i>       | 4198 |                                                  |
| UP000006765 | 1231392 | <i>Oceaniovalibus</i>      | <i>guishaninsula</i>      | 2840 |                                                  |
| UP000006791 | 981222  | <i>Chloracidobacterium</i> | <i>thermophilum</i>       | 3053 |                                                  |
| UP000006793 | 667014  | <i>Thermodesulfator</i>    | <i>indicus</i>            | 2184 | CDC37_M, SPACA9,<br>Flu_B_NS1                    |
| UP000006803 | 696747  | <i>Arthrospira</i>         | <i>platensis</i>          | 6009 | ECSIT                                            |
| UP000006811 | 261317  | <i>Buchnera</i>            | <i>aphidicola</i>         | 359  |                                                  |
| UP000006821 | 243233  | <i>Methylococcus</i>       | <i>capsulatus</i>         | 2925 |                                                  |
| UP000006833 | 398580  | <i>Dinoroseobacter</i>     | <i>shibae</i>             | 4086 |                                                  |
| UP000006851 | 700015  | <i>Coriobacterium</i>      | <i>glomerans</i>          | 1768 | Sec62, zf-TRM13_CCCH                             |
| UP000006859 | 198628  | <i>Dickeya</i>             | <i>dadantii</i>           | 4532 | zf-CCCH, HMG_box_2,<br>Bac_thur toxin            |
| UP000006860 | 756272  | <i>Rubinisphaera</i>       | <i>brasiliensis</i>       | 4710 | zf-C4pol                                         |
| UP000006866 | 572479  | <i>Halanaerobium</i>       | <i>praevalens</i>         | 2055 | Stirrup                                          |
| UP000006871 | 880591  | <i>Ketogulonicigenium</i>  | <i>vulgare</i>            | 3209 | HopW1-1, DUF4730                                 |
| UP000006872 | 701347  | <i>Enterobacter</i>        | <i>lignolyticus</i>       | 4393 |                                                  |
| UP000006875 | 572544  | <i>Ilyobacter</i>          | <i>polytropus</i>         | 2859 | MHC_II_alpha                                     |
| UP000006908 | 1005058 | <i>Gallibacterium</i>      | <i>anatis</i>             | 2482 | DUF5090                                          |
| UP000007013 | 452637  | <i>Opiritutus</i>          | <i>terrae</i>             | 4588 | Rif1_N, MRP-S35                                  |
| UP000007029 | 375451  | <i>Roseobacter</i>         | <i>denitrificans</i>      | 4118 |                                                  |
| UP000007030 | 869210  | <i>Marinithermus</i>       | <i>hydrothermalis</i>     | 2194 | P3A                                              |
| UP000007039 | 768670  | <i>Calditerrivibrio</i>    | <i>nitroreducens</i>      | 2089 |                                                  |
| UP000007053 | 264732  | <i>Moorella</i>            | <i>thermoacetica</i>      | 2451 | TF_AP-2, Matrilin_ccoil                          |
| UP000007058 | 342108  | <i>Magnetospirillum</i>    | <i>magneticum</i>         | 4514 |                                                  |
| UP000007074 | 399741  | <i>Serratia</i>            | <i>proteamaculans</i>     | 4930 | DUF4638, Homez                                   |
| UP000007076 | 452652  | <i>Kitasatospora</i>       | <i>setae</i>              | 7443 | DUF3475, Hyaluronidase_1                         |
| UP000007102 | 868864  | <i>Desulfurobacterium</i>  | <i>thermolithotrophum</i> | 1496 | UPF0254, Fibrillarlin_2,<br>Beta lactamase3, HMD |
| UP000007127 | 1123366 | <i>Thalassospira</i>       | <i>xiamenensis</i>        | 4340 | Bundlin, VSP, MAT1                               |
| UP000007150 | 690566  | <i>Sphingobium</i>         | <i>chlorophenolicum</i>   | 4062 | DUF4799                                          |
| UP000007161 | 443254  | <i>Marinitoga</i>          | <i>piezophila</i>         | 2044 | Pepsin-I3, DUF1930, rpo30_N,<br>UBA_3            |
| UP000007177 | 931626  | <i>Acetobacterium</i>      | <i>woodii</i>             | 3445 | Viral_DNA_bi, Pik1, DUF1474                      |
| UP000007347 | 651182  | <i>Desulfobacula</i>       | <i>toluolica</i>          | 4189 | DUF4187, TYW3, Spin-<br>dle_Spc25, Rep_fac-A_C   |
| UP000007364 | 555500  | <i>Galbibacter</i>         | <i>marinus</i>            | 3099 |                                                  |
| UP000007394 | 945713  | <i>Ignavibacterium</i>     | <i>album</i>              | 3169 | TMEM223                                          |
| UP000007397 | 866895  | <i>Halobacillus</i>        | <i>halophilus</i>         | 4100 | MCRS_N, DUF4793, DUF2096                         |



|             |         |                         |                        |      |                                                                |
|-------------|---------|-------------------------|------------------------|------|----------------------------------------------------------------|
| UP000007435 | 649349  | <i>Leadbetterella</i>   | <i>byssophila</i>      | 3429 | LBR_tudor                                                      |
| UP000007460 | 488538  | <i>Puniceispirillum</i> | <i>marinum</i>         | 2545 | KH_6, CD99L2                                                   |
| UP000007463 | 755732  | <i>Fluviicola</i>       | <i>taffensis</i>       | 4016 | TLP-20, Antimicrobial15                                        |
| UP000007468 | 546269  | <i>Filifactor</i>       | <i>alocis</i>          | 1616 | RICH                                                           |
| UP000007472 | 937774  | <i>Taylorella</i>       | <i>equigenitalis</i>   | 1556 | ESM4, Rota_NSP4, IL31                                          |
| UP000007487 | 867900  | <i>Cellulophaga</i>     | <i>lytica</i>          | 3281 | Decorin_bind, SART-1, SAS-6_N, Herpes_BMRF2, Myb_Cef, PRRSV_2b |
| UP000007488 | 645991  | <i>Syntrophobotulus</i> | <i>glycolicus</i>      | 3105 | SAC3_GANP, AAA_9                                               |
| UP000007517 | 1146883 | <i>Blastococcus</i>     | <i>saxobsidens</i>     | 4791 | DUF1604                                                        |
| UP000007519 | 984262  | <i>Saprospira</i>       | <i>grandis</i>         | 4218 | Tox-MPTase2, IHO1                                              |
| UP000007587 | 1144275 | <i>Coralloccoccus</i>   | <i>coralloides</i>     | 8019 | zf-CCHC                                                        |
| UP000007590 | 929556  | <i>Solitalea</i>        | <i>canadensis</i>      | 4304 | DUF3642, Oberon_cc, Rhabdo_ncap_2                              |
| UP000007652 | 857293  | <i>Caloramator</i>      | <i>australicus</i>     | 2679 | UBN_AB, VP4_haemagglut, zf-CpG_bind_C                          |
| UP000007719 | 515635  | <i>Dictyoglomus</i>     | <i>turgidum</i>        | 1743 | AAA_8                                                          |
| UP000007730 | 504832  | <i>Oligotropha</i>      | <i>carboxidovorans</i> | 3624 | MAS20, DUF2890, tRNA_NucTransf2                                |
| UP000007809 | 675635  | <i>Pseudonocardia</i>   | <i>dioxanivorans</i>   | 6620 | CARM1, Kinocilin                                               |
| UP000007880 | 926550  | <i>Caldilinea</i>       | <i>aerophila</i>       | 4097 | Herpes_UL20                                                    |
| UP000007881 | 1142394 | <i>Phycisphaera</i>     | <i>mikurensis</i>      | 3269 | tRNA_bind_2, K_channel_TID                                     |
| UP000007882 | 512565  | <i>Actinoplanes</i>     | <i>missouriensis</i>   | 8113 | Ntox27, MAGE_N                                                 |
| UP000007883 | 983917  | <i>Rubrivivax</i>       | <i>gelatinosus</i>     | 4686 |                                                                |
| UP000007938 | 596154  | <i>Alicyclophilus</i>   | <i>denitrificans</i>   | 4620 | DUF1010                                                        |
| UP000007944 | 650150  | <i>Erysipelothrix</i>   | <i>rhusiopathiae</i>   | 1679 | UPF0139                                                        |
| UP000007947 | 1032480 | <i>Micrococcus</i>      | <i>phosphovorans</i>   | 5305 | SAPIS-gp6, Colicin_M, Sperio-lin_N                             |
| UP000007962 | 471853  | <i>Beutenbergia</i>     | <i>cavernae</i>        | 4195 |                                                                |
| UP000007966 | 218491  | <i>Pectobacterium</i>   | <i>atrosepticum</i>    | 4459 | CDK2AP, DUF4756                                                |
| UP000007967 | 479435  | <i>Kribbella</i>        | <i>flavida</i>         | 6940 |                                                                |
| UP000007968 | 479436  | <i>Veillonella</i>      | <i>parvula</i>         | 1843 | MHC2-interact, RRP36                                           |
| UP000008080 | 264462  | <i>Bdellovibrio</i>     | <i>bacteriovorus</i>   | 3583 | Dynein_heavy, FAM75, Transcript_VP30                           |
| UP000008130 | 991905  | <i>Polymorphum</i>      | <i>gilvum</i>          | 4354 | V-SNARE_C                                                      |
| UP000008139 | 760142  | <i>Hippea</i>           | <i>maritima</i>        | 1653 | ACDC, Peptidase_M44, Ribosomal_S26e                            |
| UP000008148 | 290338  | <i>Citrobacter</i>      | <i>koseri</i>          | 5019 |                                                                |
| UP000008178 | 585394  | <i>Roseburia</i>        | <i>hominis</i>         | 3351 |                                                                |
| UP000008183 | 243274  | <i>Thermotoga</i>       | <i>maritima</i>        | 1852 | JMY, DUF3855, DUF1923                                          |
| UP000008221 | 351607  | <i>Acidothermus</i>     | <i>cellulolyticus</i>  | 2157 |                                                                |
| UP000008229 | 469383  | <i>Conexibacter</i>     | <i>woesei</i>          | 5912 | DUF4639                                                        |
| UP000008234 | 699246  | <i>Magaeibacillus</i>   | <i>indolicus</i>       | 1566 | zf-RING_10, CCDC142                                            |
| UP000008289 | 243164  | <i>Dehalococcoides</i>  | <i>mccartyi</i>        | 1502 |                                                                |
| UP000008291 | 292415  | <i>Thiobacillus</i>     | <i>denitrificans</i>   | 2826 | Adeno_hexon_C, RdRP_5                                          |

|             |         |                          |                        |      |                                                            |
|-------------|---------|--------------------------|------------------------|------|------------------------------------------------------------|
| UP000008308 | 263358  | <i>Verrucosipora</i>     | <i>maris</i>           | 5998 | RE_BstXI                                                   |
| UP000008332 | 338969  | <i>Rhodoferax</i>        | <i>ferrireducens</i>   | 4401 | Jas                                                        |
| UP000008366 | 1184609 | <i>Kineosphaera</i>      | <i>limosa</i>          | 4422 |                                                            |
| UP000008385 | 365046  | <i>Ramlibacter</i>       | <i>tataouinensis</i>   | 3880 |                                                            |
| UP000008392 | 1005048 | <i>Collimonas</i>        | <i>fungivorans</i>     | 4429 | DEK_C, HPIH                                                |
| UP000008456 | 940190  | <i>Melissococcus</i>     | <i>plutonium</i>       | 1876 | Kin17_mid                                                  |
| UP000008457 | 697281  | <i>Mahella</i>           | <i>australiensis</i>   | 2858 | TFX_C                                                      |
| UP000008461 | 760192  | <i>Haliscomenobacter</i> | <i>hydrossis</i>       | 6704 | Mid2, UFD1, CAGE1, CRPV_capsid, SWC7, MOZART1, Vps4_C      |
| UP000008467 | 642492  | <i>Cellulosilyticum</i>  | <i>lentocellum</i>     | 4150 | RLL, BPS1, C9orf72-like, DUF775, PA28_beta                 |
| UP000008495 | 1184607 | <i>Austwickia</i>        | <i>chelonae</i>        | 3048 | Diphtheria_T, Diphtheria_R                                 |
| UP000008514 | 313595  | <i>Psychroflexus</i>     | <i>torquis</i>         | 3457 | MOSP_N, PCIF1_WW, DUF5091, Cyt b-c1_8                      |
| UP000008520 | 420890  | <i>Lactococcus</i>       | <i>garvieae</i>        | 1938 | BNIP3, Lac_bphage_repr                                     |
| UP000008543 | 228400  | <i>Histophilus</i>       | <i>somni</i>           | 1971 |                                                            |
| UP000008544 | 477974  | <i>Desulforudis</i>      | <i>audaxviator</i>     | 2136 |                                                            |
| UP000008550 | 498761  | <i>Heliobacterium</i>    | <i>modesticaldum</i>   | 2922 |                                                            |
| UP000008558 | 441768  | <i>Acholeplasma</i>      | <i>laidlawii</i>       | 1380 |                                                            |
| UP000008561 | 96561   | <i>Desulfococcus</i>     | <i>oleovorans</i>      | 3255 |                                                            |
| UP000008631 | 575540  | <i>Isosphaera</i>        | <i>pallida</i>         | 3721 |                                                            |
| UP000008633 | 749222  | <i>Nitratifractor</i>    | <i>salsuginis</i>      | 2076 |                                                            |
| UP000008641 | 865938  | <i>Weeksella</i>         | <i>virosa</i>          | 2045 |                                                            |
| UP000008674 | 309807  | <i>Salinibacter</i>      | <i>ruber</i>           | 2812 | Nab1, HisKA_4TM                                            |
| UP000008707 | 768066  | <i>Halomonas</i>         | <i>elongata</i>        | 3469 |                                                            |
| UP000008718 | 694427  | <i>Paludibacter</i>      | <i>propionigenes</i>   | 3020 | SYS1, ATS3                                                 |
| UP000008720 | 643867  | <i>Marivirga</i>         | <i>tractuosa</i>       | 3748 | SMRP1, RNA_polI_A14, DUF688, Complex1_LYR, Integrin B tail |
| UP000008721 | 709032  | <i>Sulfuricurvum</i>     | <i>kujiense</i>        | 2794 | Rrp15p, cwf21                                              |
| UP000008722 | 670487  | <i>Oceanithermus</i>     | <i>profundus</i>       | 2372 |                                                            |
| UP000008798 | 717962  | <i>Coprococcus</i>       | <i>catus</i>           | 2985 |                                                            |
| UP000008801 | 717960  | <i>Faecalitalea</i>      | <i>cylindroides</i>    | 1442 |                                                            |
| UP000008805 | 657308  | <i>Gordonibacter</i>     | <i>pamelaeae</i>       | 2027 | DUF4642                                                    |
| UP000008806 | 657316  | <i>Megamonas</i>         | <i>hypermegale</i>     | 2118 |                                                            |
| UP000008838 | 378753  | <i>Kocuria</i>           | <i>rhizophila</i>      | 2352 |                                                            |
| UP000008840 | 522373  | <i>Stenotrophomonas</i>  | <i>maltophilia</i>     | 4365 | Poxvirus_B22R_C                                            |
| UP000008850 | 1082931 | <i>Pelagibacterium</i>   | <i>halotolerans</i>    | 3875 |                                                            |
| UP000008878 | 203124  | <i>Trichodesmium</i>     | <i>erythraeum</i>      | 4342 | RAB3GAP2_N, Tom22, DUF1509                                 |
| UP000008888 | 857087  | <i>Methylomonas</i>      | <i>methanica</i>       | 4435 | DUF4518, SICA_alpha, DUF2407, PARM, Dymeclin               |
| UP000008898 | 63186   | <i>Zobellia</i>          | <i>galactanivorans</i> | 4708 | RTBV_P46, SH2_2, UL45, ESR1_C                              |
| UP000008908 | 886377  | <i>Muricauda</i>         | <i>ruestringensis</i>  | 3425 | Peptidase_S30                                              |

|             |         |                          |                        |      |                                                                     |
|-------------|---------|--------------------------|------------------------|------|---------------------------------------------------------------------|
| UP000008914 | 710696  | <i>Intrasporangium</i>   | <i>calvum</i>          | 3551 |                                                                     |
| UP000008915 | 644966  | <i>Thermaerobacter</i>   | <i>marianensis</i>     | 2324 |                                                                     |
| UP000008922 | 926569  | <i>Anaerolinea</i>       | <i>thermophila</i>     | 3110 | DUF1246                                                             |
| UP000008955 | 657314  | <i>Blautia</i>           | <i>obeum</i>           | 3155 | HAUS4                                                               |
| UP000008957 | 651822  | <i>Fretibacterium</i>    | <i>fastidiosum</i>     | 1434 |                                                                     |
| UP000008960 | 649756  | <i>Anaerostipes</i>      | <i>hadrus</i>          | 2771 | CaKB, 7TM_GPCR_Srt, Birna_RdRp, Mem10, DUF1947, Med10               |
| UP000008963 | 862908  | <i>Halobacteriovorax</i> | <i>marinus</i>         | 3230 | Stanniocalcin                                                       |
| UP000009010 | 745277  | <i>Rahnella</i>          | <i>aquatilis</i>       | 4841 | Pil1, Cornichon, ESAG1                                              |
| UP000009011 | 1191523 | <i>Melioribacter</i>     | <i>roseus</i>          | 2833 | HBS1_N, ATP13                                                       |
| UP000009047 | 644282  | <i>Desulfarculus</i>     | <i>baarsii</i>         | 3268 |                                                                     |
| UP000009049 | 313596  | <i>Robiginitalea</i>     | <i>biformata</i>       | 3211 |                                                                     |
| UP000009073 | 595494  | <i>Tolomonas</i>         | <i>auensis</i>         | 3126 |                                                                     |
| UP000009080 | 377629  | <i>Teredinibacter</i>    | <i>turnerae</i>        | 4249 | Velvet, ALS2CR8                                                     |
| UP000009102 | 555778  | <i>Halothiobacillus</i>  | <i>neapolitanus</i>    | 2353 | Hema_HEFG                                                           |
| UP000009149 | 481448  | <i>Methylacidiphilum</i> | <i>inferorum</i>       | 2470 |                                                                     |
| UP000009235 | 443218  | <i>Amycolicoccus</i>     | <i>subflavus</i>       | 4703 |                                                                     |
| UP000009236 | 743718  | <i>Isoptericola</i>      | <i>variabilis</i>      | 2879 |                                                                     |
| UP000009282 | 1085623 | <i>Glaciecola</i>        | <i>nitratireducens</i> | 3653 | Pox_A6                                                              |
| UP000009286 | 856793  | <i>Micavibrio</i>        | <i>aeruginosavorus</i> | 2432 | DUF1068                                                             |
| UP000009309 | 1185876 | <i>Fibrisoma</i>         | <i>limi</i>            | 6341 |                                                                     |
| UP000009338 | 1141663 | <i>Providencia</i>       | <i>rettgeri</i>        | 3847 | STAT_int, RNA_pol_Rpc82                                             |
| UP000009874 | 883126  | <i>Massilia</i>          | <i>timonae</i>         | 5096 |                                                                     |
| UP000009875 | 883081  | <i>Alloiococcus</i>      | <i>otitis</i>          | 1627 | TRIQQ                                                               |
| UP000009881 | 1238182 | <i>Caenispirillum</i>    | <i>salinarum</i>       | 4574 |                                                                     |
| UP000009888 | 883066  | <i>Actinobaculum</i>     | <i>massiliense</i>     | 1696 |                                                                     |
| UP000010294 | 553217  | <i>Enhydrobacter</i>     | <i>aerosaccus</i>      | 2573 | PDR_assoc                                                           |
| UP000010366 | 1173020 | <i>Chamaesiphon</i>      | <i>minutus</i>         | 5815 | TM140, RICTOR_N, Auxin canal                                        |
| UP000010367 | 56110   | <i>Oscillatoria</i>      | <i>acuminata</i>       | 5755 | AC_N, Tox-REase-2, TFIID_30kDa, VCX_VCY, PALB2_WD40, XG_FTase, Tfb4 |
| UP000010384 | 251229  | <i>Chroococidiopsis</i>  | <i>thermalis</i>       | 5740 | DUF3778, Fox-1_C, SRP68, DUF22, RRM_2                               |
| UP000010388 | 292564  | <i>Cyanobium</i>         | <i>gracile</i>         | 3261 |                                                                     |
| UP000010472 | 1173022 | <i>Crinalium</i>         | <i>epipsammum</i>      | 4697 | Phyto_Pns9_10, DRIM, DUF758, TcpF, Syntaxin-5_N                     |
| UP000010473 | 111780  | <i>Stanieria</i>         | <i>cyanosphaera</i>    | 4751 | CHDCT2, dsDNA_bind                                                  |
| UP000010474 | 272123  | <i>Anabaena</i>          | <i>cylindrica</i>      | 5797 | Sec63, Rho_GDI                                                      |
| UP000010475 | 56107   | <i>Cylindrospermum</i>   | <i>stagnale</i>        | 6200 | Rgp1, TMEM214, BCIP, SPA, AAR2                                      |
| UP000010480 | 755178  | <i>Cyanobacterium</i>    | <i>aponinum</i>        | 3415 | RdRP_2, BCNT, WHAMM-JMY_N, UBA_e1 thiolCys                          |
| UP000010483 | 292563  | <i>Cyanobacterium</i>    | <i>stanieri</i>        | 2831 |                                                                     |

|             |         |                           |                        |       |                                                                                       |
|-------------|---------|---------------------------|------------------------|-------|---------------------------------------------------------------------------------------|
| UP000010716 | 986075  | <i>Caldalkalibacillus</i> | <i>thermarum</i>       | 2969  | zf-CW, FAM199X, DUF2370, E7                                                           |
| UP000010795 | 717605  | <i>Thermobacillus</i>     | <i>composti</i>        | 3802  | YrpD, Autophagy_C                                                                     |
| UP000010796 | 926556  | <i>Echinicola</i>         | <i>vietnamensis</i>    | 4509  | DUF5415                                                                               |
| UP000010798 | 886293  | <i>Singulisphaera</i>     | <i>acidiphila</i>      | 7126  | DUF4732, UPF0542                                                                      |
| UP000010799 | 1215343 | <i>Liberibacter</i>       | <i>creescens</i>       | 1376  |                                                                                       |
| UP000010802 | 1209989 | <i>Tepidanaerobacter</i>  | <i>acetatoxydans</i>   | 2640  | Flu_B_M2, Baculo_p48, Ecm29                                                           |
| UP000010816 | 765912  | <i>Thioflavococcus</i>    | <i>mobilis</i>         | 3528  | Nb11_Borealini_N                                                                      |
| UP000010880 | 748449  | <i>Halobacteroides</i>    | <i>halobius</i>        | 2452  | PDCD2_C, Rad9, Helo_like_N                                                            |
| UP000010953 | 1239962 | <i>Mariniradius</i>       | <i>saccharolyticus</i> | 4633  | CytadhesinP1                                                                          |
| UP000011021 | 887898  | <i>Lautropia</i>          | <i>mirabilis</i>       | 2665  | XPG_I_2                                                                               |
| UP000011058 | 1166018 | <i>Fibrella</i>           | <i>aestuarina</i>      | 5627  |                                                                                       |
| UP000011135 | 1237149 | <i>Fulvivirga</i>         | <i>intechensis</i>     | 5952  | Ribosomal_L22e, Pox_I6                                                                |
| UP000011173 | 592029  | <i>Nonlabens</i>          | <i>dokdonensis</i>     | 3613  |                                                                                       |
| UP000011201 | 927668  | <i>Pseudanabaena</i>      | <i>biceps</i>          | 4751  | RE_LlaMI, NGP1NT, ATG27, Jiv90                                                        |
| UP000011617 | 1261130 | <i>Wohlfahrtiimonas</i>   | <i>chitiniclastica</i> | 2004  |                                                                                       |
| UP000011682 | 1242864 | <i>Cystobacter</i>        | <i>fuscus</i>          | 10511 | Diphtheria_C, Matrix, TIM21, RBP_receptor, DUF3548, Phage_C, Phage_F, Exotox-A_cataly |
| UP000011704 | 1266370 | <i>Nitrospina</i>         | <i>gracilis</i>        | 2962  |                                                                                       |
| UP000011721 | 1167006 | <i>Desulfocapsa</i>       | <i>sulfexigens</i>     | 3514  |                                                                                       |
| UP000011746 | 1230341 | <i>Salimicrobium</i>      | <i>jeotgali</i>        | 2730  | TRC8_N, yqaH                                                                          |
| UP000011758 | 999415  | <i>Eggerthia</i>          | <i>cateniformis</i>    | 1874  | AATF-Che1                                                                             |
| UP000011765 | 747365  | <i>Thermodesulfobium</i>  | <i>narugense</i>       | 1797  | FBA_2                                                                                 |
| UP000011834 | 1124991 | <i>Morganella</i>         | <i>morganii</i>        | 3510  | DX                                                                                    |
| UP000011846 | 1171377 | <i>Bibersteinia</i>       | <i>trehalosi</i>       | 2244  |                                                                                       |
| UP000011863 | 1313172 | <i>Ilumatobacter</i>      | <i>coccineus</i>       | 4290  |                                                                                       |
| UP000011866 | 1298593 | <i>Thalassolituus</i>     | <i>oleivorans</i>      | 3634  | PaaSYMP, Chibby                                                                       |
| UP000011910 | 1279009 | <i>Cesiribacter</i>       | <i>andamanensis</i>    | 4225  | Nup96                                                                                 |
| UP000011919 | 1235279 | <i>Bhargavaea</i>         | <i>cecembensis</i>     | 3168  | Birna_VP4, DUF4658                                                                    |
| UP000012283 | 1308866 | <i>Gracilibacillus</i>    | <i>halophilus</i>      | 2968  | Grg1, RIX1, Gemini_AL3, DUF1672                                                       |
| UP000013167 | 1193181 | <i>Tetrasphaera</i>       | <i>elongata</i>        | 3089  |                                                                                       |
| UP000013232 | 1123367 | <i>Thauera</i>            | <i>linaloolentis</i>   | 3836  | Sec6                                                                                  |
| UP000013378 | 1304284 | <i>Caldisalibacacter</i>  | <i>kiritimatiensis</i> | 2681  | BBS2_C, Tenui_NS3, DUF2717, Orthopox_A49R, CP2, BCAS2, Gly acyl tr N                  |
| UP000013981 | 1203606 | <i>Butyricoccus</i>       | <i>pullicaecorum</i>   | 3107  | HPS6                                                                                  |
| UP000014012 | 1315976 | <i>Plesiomonas</i>        | <i>shigelloides</i>    | 3377  | Retrotran_gag_2                                                                       |
| UP000014174 | 1150600 | <i>Arcticibacter</i>      | <i>svalbardensis</i>   | 4309  | DUF3538, DUF1689, TMEM174, BTV_NS2, DUF4628, Pox_A3L                                  |
| UP000014216 | 1286635 | <i>Desulfotignum</i>      | <i>phosphitoxidans</i> | 4515  | IGR, DUF531                                                                           |
| UP000014227 | 1303518 | <i>Chthonomonas</i>       | <i>calidirosea</i>     | 2809  | TMIE, Dendrin                                                                         |

|             |         |                           |                          |      |                                                                                                                          |
|-------------|---------|---------------------------|--------------------------|------|--------------------------------------------------------------------------------------------------------------------------|
| UP000014417 | 883161  | <i>Propionimicrobium</i>  | <i>lymphophilum</i>      | 2076 | AGTRAP, DUF2576                                                                                                          |
| UP000014461 | 1331007 | <i>Agarivorans</i>        | <i>albus</i>             | 4397 | Mei4, Av_adeno_fibre, Seleni-umBinding, AlcCBM31                                                                         |
| UP000014822 | 1330036 | <i>Osedax</i>             | <i>symbiont</i>          | 4383 | Nucleoporin_C                                                                                                            |
| UP000014827 | 1112230 | <i>Chlamydia</i>          | <i>psittaci</i>          | 2863 | LtuB, ANTH, Chlam_OMP3, Peptidase_C65, Chlam_vir, 7tm_4, DUF1137, DUF5423, DUF1547, DUF720, DUF5421, DUF1548, ChlamPMP_M |
| UP000014923 | 941824  | <i>Thermobrachium</i>     | <i>celere</i>            | 2370 | MRP-S25                                                                                                                  |
| UP000014962 | 641526  | <i>Winogradskyella</i>    | <i>psychrotolerans</i>   | 4023 | ORMDL, Ephrin_lbd                                                                                                        |
| UP000015346 | 1123069 | <i>Rubellimicrobium</i>   | <i>thermophilum</i>      | 3244 |                                                                                                                          |
| UP000015347 | 1123237 | <i>Salipiger</i>          | <i>mucosus</i>           | 5583 | EF_assoc_1, Claudin_3                                                                                                    |
| UP000015351 | 1123360 | <i>Litoreibacter</i>      | <i>arenae</i>            | 3640 |                                                                                                                          |
| UP000015559 | 1163617 | <i>Sulfuricella</i>       | <i>denitrificans</i>     | 3071 | SF3b1                                                                                                                    |
| UP000015924 | 1384484 | <i>Adlercreutzia</i>      | <i>equolifaciens</i>     | 2281 | ProSAAS                                                                                                                  |
| UP000016057 | 1234409 | <i>Catelicoccus</i>       | <i>marimammalium</i>     | 1196 | DUF3385                                                                                                                  |
| UP000016160 | 1347342 | <i>Formosa</i>            | <i>agariphila</i>        | 3557 | DUF4107                                                                                                                  |
| UP000016368 | 887062  | <i>Hylemonella</i>        | <i>gracilis</i>          | 3342 | DUF4510                                                                                                                  |
| UP000016462 | 1330458 | <i>Agrococcus</i>         | <i>pavilionensis</i>     | 2776 |                                                                                                                          |
| UP000016519 | 1321816 | <i>Alloscardovia</i>      | <i>omnicolens</i>        | 1649 | Fiji_64_capsid, zf-UBR                                                                                                   |
| UP000016843 | 1123057 | <i>Rhodonellum</i>        | <i>psychrophilum</i>     | 4904 | Erp_C                                                                                                                    |
| UP000016901 | 891974  | <i>Plautia</i>            | <i>stali</i>             | 5007 | DUF4755, DUF1472                                                                                                         |
| UP000016960 | 582515  | <i>Rubidibacter</i>       | <i>lacunae</i>           | 3455 | Pertus-S5-tox, AA_permease_N                                                                                             |
| UP000017081 | 1319815 | <i>Cetobacterium</i>      | <i>somerae</i>           | 2974 | CNOT1_TTP_bind                                                                                                           |
| UP000017148 | 1313304 | <i>Chitinivibrio</i>      | <i>alkaliphilus</i>      | 2304 | B3                                                                                                                       |
| UP000017429 | 1379858 | <i>Mucispirillum</i>      | <i>schaedleri</i>        | 2091 | COBRA, Viral_P18                                                                                                         |
| UP000017747 | 994573  | <i>Youngiibacter</i>      | <i>fragilis</i>          | 3736 | PV_NSP1                                                                                                                  |
| UP000017813 | 641147  | <i>Simonsiella</i>        | <i>muelleri</i>          | 2220 | S1-like, DUF1136, DUF4580, RasGEF_N                                                                                      |
| UP000017819 | 631454  | <i>Lutibaculum</i>        | <i>baratangense</i>      | 4164 | Ferlin_C, Mit_ribos_Mrp51                                                                                                |
| UP000017842 | 1116472 | <i>Methyloglobulus</i>    | <i>morosus</i>           | 3737 | Mtr2, RE_Bsp6I                                                                                                           |
| UP000017881 | 1260251 | <i>Spiribacter</i>        | <i>salinus</i>           | 1684 | Nup192                                                                                                                   |
| UP000017958 | 1263095 | <i>Paraprevotella</i>     | <i>clara</i>             | 2847 | DUF5041                                                                                                                  |
| UP000018034 | 1263099 | <i>Parasutterella</i>     | <i>excrementihominis</i> | 2228 |                                                                                                                          |
| UP000018109 | 1263073 | <i>Dorea</i>              | <i>formicigenerans</i>   | 2461 | Tir_receptor_M                                                                                                           |
| UP000018126 | 1408226 | <i>Vagococcus</i>         | <i>lutrae</i>            | 1736 |                                                                                                                          |
| UP000018227 | 592026  | <i>Catonella</i>          | <i>morbi</i>             | 3288 | SSP160, COBRA1, PRP1_N                                                                                                   |
| UP000018296 | 1395513 | <i>Sporolactobacillus</i> | <i>laevolacticus</i>     | 3497 | DUF3287, Colicin_im, Brr6 like C C, Ral                                                                                  |
| UP000018435 | 1003237 | <i>Nitrospirillum</i>     | <i>amazonense</i>        | 3357 |                                                                                                                          |
| UP000018458 | 762983  | <i>Succinatimonas</i>     | <i>hippei</i>            | 2169 |                                                                                                                          |
| UP000018466 | 796942  | <i>Stomatobaculum</i>     | <i>longum</i>            | 2070 | OspD, DUF384                                                                                                             |
| UP000018680 | 1307761 | <i>Salinispira</i>        | <i>pacifica</i>          | 3350 |                                                                                                                          |

|             |         |                         |                            |      |                                              |
|-------------|---------|-------------------------|----------------------------|------|----------------------------------------------|
| UP000018766 | 1414851 | <i>Pelistega</i>        | <i>indica</i>              | 2121 | Tma16, Aquarius_N                            |
| UP000018780 | 999552  | <i>Leisingera</i>       | <i>methylohalidivorans</i> | 4508 |                                              |
| UP000018840 | 1403945 | <i>Negativicoccus</i>   | <i>succinicivorans</i>     | 1679 |                                              |
| UP000018843 | 1403948 | <i>Varibaculum</i>      | <i>cambriense</i>          | 2003 | Adeno_E3_CR2                                 |
| UP000018850 | 1286632 | <i>Zhouia</i>           | <i>amyolytica</i>          | 3362 | Blt1_C                                       |
| UP000018901 | 880074  | <i>Barnesiella</i>      | <i>viscericola</i>         | 2487 | Cep3                                         |
| UP000019023 | 694431  | <i>Desulfurella</i>     | <i>acetivorans</i>         | 1825 |                                              |
| UP000019030 | 1441930 | <i>Chania</i>           | <i>multitudinisentens</i>  | 4521 | DHNA                                         |
| UP000019050 | 592010  | <i>Abiotrophia</i>      | <i>defectiva</i>           | 1943 | Erv26                                        |
| UP000019062 | 1227360 | <i>Viridibacillus</i>   | <i>arenosi</i>             | 4296 |                                              |
| UP000019063 | 1317118 | <i>Roseivivax</i>       | <i>atlanticus</i>          | 4264 |                                              |
| UP000019112 | 1399147 | <i>Holospira</i>        | <i>obtusa</i>              | 1116 |                                              |
| UP000019151 | 861299  | <i>Gemmatirosa</i>      | <i>kalamazoonesis</i>      | 6261 |                                              |
| UP000019190 | 1432561 | <i>Klebsiella</i>       | <i>pneumoniae</i>          | 5313 | COX7C, DUF4165                               |
| UP000019205 | 314285  | <i>Congregibacter</i>   | <i>litoralis</i>           | 3868 |                                              |
| UP000019225 | 1449976 | <i>Kutzneria</i>        | <i>albida</i>              | 8775 | GP70, DUF3523, Trans-glut prok               |
| UP000019242 | 1121126 | <i>Brochothrix</i>      | <i>thermosphacta</i>       | 2589 | Strabismus                                   |
| UP000019276 | 1328313 | <i>Catenovulum</i>      | <i>agarivorans</i>         | 3835 |                                              |
| UP000019277 | 909613  | <i>Actinokineospora</i> | <i>spheciospongiae</i>     | 6610 |                                              |
| UP000019325 | 313624  | <i>Nodularia</i>        | <i>spumigena</i>           | 5211 | CENP-B_dimeris, IL12, DUF4499, FAM47, KRTDAP |
| UP000019402 | 869213  | <i>Saccharicrinis</i>   | <i>fermentans</i>          | 4663 | Siah-Interact_N                              |
| UP000019423 | 1227739 | <i>Hymenobacter</i>     | <i>swuensis</i>            | 4612 | NADPH_Ox                                     |
| UP000019464 | 1229521 | <i>Nitrincola</i>       | <i>nitratireducens</i>     | 4019 |                                              |
| UP000019485 | 479430  | <i>Actinospica</i>      | <i>robiniae</i>            | 191  |                                              |
| UP000019486 | 1385369 | <i>Skermanella</i>      | <i>stibiiresistens</i>     | 7269 |                                              |
| UP000019593 | 1294273 | <i>Roseibacterium</i>   | <i>elongatum</i>           | 3433 | Ribosomal_L23eN                              |
| UP000019656 | 1196095 | <i>Gilliamella</i>      | <i>apicola</i>             | 2784 | Seadorna_VP6, PsaN                           |
| UP000019675 | 1145276 | <i>Lysinibacillus</i>   | <i>varians</i>             | 4504 | Picornia_P3A                                 |
| UP000019678 | 1192034 | <i>Chondromyces</i>     | <i>apiculatus</i>          | 9037 | CX9C, Msg2_C, VWC, Lamprin, TILa             |
| UP000019681 | 1403537 | <i>Fervidicella</i>     | <i>metallireducens</i>     | 2800 | Rhabdo_glycop                                |
| UP000019753 | 948458  | <i>Actinotalea</i>      | <i>ferrariae</i>           | 3558 |                                              |
| UP000019755 | 1292022 | <i>Curtobacterium</i>   | <i>flaccumfaciens</i>      | 3386 |                                              |
| UP000019760 | 1231351 | <i>Acidomonas</i>       | <i>methanolica</i>         | 3270 |                                              |
| UP000019767 | 1164990 | <i>Richelia</i>         | <i>intracellularis</i>     | 7610 |                                              |
| UP000019771 | 1661    | <i>Trueperella</i>      | <i>pyogenes</i>            | 1984 |                                              |
| UP000019805 | 1437824 | <i>Castellaniella</i>   | <i>defragrans</i>          | 3575 | DUF5401                                      |
| UP000019849 | 69279   | <i>Aquamicrobium</i>    | <i>defluvii</i>            | 4454 |                                              |
| UP000021053 | 927661  | <i>Cryptosporangium</i> | <i>arvum</i>               | 4033 |                                              |

|             |         |                            |                         |      |                                                                             |
|-------------|---------|----------------------------|-------------------------|------|-----------------------------------------------------------------------------|
| UP000023044 | 866499  | <i>Cloacibacillus</i>      | <i>evryensis</i>        | 1082 |                                                                             |
| UP000023435 | 1444315 | <i>Lysobacter</i>          | <i>capsici</i>          | 5139 | HOASN                                                                       |
| UP000023541 | 1317122 | <i>Aquimarina</i>          | <i>atlantica</i>        | 4786 | DUF1041, UPF0506, Frizzled, WAP, Pox_P4A                                    |
| UP000023772 | 1168034 | <i>Draconibacterium</i>    | <i>orientale</i>        | 3940 | Peroxidase_2, Cbl_N                                                         |
| UP000024387 | 1379159 | <i>Dyella</i>              | <i>jiangningensis</i>   | 4342 | Orbi_VP2, Chs3p                                                             |
| UP000024836 | 1461693 | <i>Actibacterium</i>       | <i>atlanticum</i>       | 3126 | Flavi_NS2B                                                                  |
| UP000026714 | 1286631 | <i>Sphaerotilus</i>        | <i>natans</i>           | 4177 | Nop53, PRTP                                                                 |
| UP000027284 | 1312852 | <i>Thermoanaerobaculum</i> | <i>aquaticum</i>        | 2252 | ECR1_N                                                                      |
| UP000027337 | 83219   | <i>Sulfitobacter</i>       | <i>mediterraneus</i>    | 3649 | Pox_T4_C                                                                    |
| UP000027341 | 28885   | <i>Hydrogenovibrio</i>     | <i>marinus</i>          | 2330 | PH_2                                                                        |
| UP000027395 | 388467  | <i>Planktothrix</i>        | <i>agardhii</i>         | 4186 | Ost5, Latrotoxin_C                                                          |
| UP000027583 | 1382230 | <i>Asaia</i>               | <i>platycodi</i>        | 3273 |                                                                             |
| UP000027604 | 1349767 | <i>Janthinobacterium</i>   | <i>agaricidamosum</i>   | 5488 | PDDEXK_6, HAP                                                               |
| UP000027616 | 1433126 | <i>Mucinivorans</i>        | <i>hirudinis</i>        | 2816 | Myc_target_1, DNA_pol_phi, Efg1                                             |
| UP000027647 | 1044    | <i>Erythrobacter</i>       | <i>longus</i>           | 3219 | MGAT2, SRA1                                                                 |
| UP000027665 | 2754    | <i>Synergistes</i>         | <i>jonesii</i>          | 2481 | FWWh, PAPA-1                                                                |
| UP000027725 | 1185766 | <i>Thioclava</i>           | <i>dalianensis</i>      | 4007 | Clc-like, DUF2053                                                           |
| UP000027821 | 1048983 | <i>Anditalea</i>           | <i>andensis</i>         | 4341 | CD4-extracel                                                                |
| UP000027931 | 1157490 | <i>Tumebacillus</i>        | <i>flagellatus</i>      | 4452 | Sep15_SelM                                                                  |
| UP000027980 | 586416  | <i>Terribacillus</i>       | <i>aidingensis</i>      | 3230 | DUF2456                                                                     |
| UP000027982 | 661478  | <i>Fimbriimonas</i>        | <i>ginsengisoli</i>     | 4817 | Peptidase_S77, Nup retrotrp bd                                              |
| UP000027986 | 1274    | <i>Dermacoccus</i>         | <i>nishinomiyaensis</i> | 2255 |                                                                             |
| UP000027997 | 305900  | <i>Endozoicomonas</i>      | <i>elysicola</i>        | 4147 | HLH, Homeobox, Homeobox_KN, Sial-lect-inser, DUF3605, Uteroglobin, SOCS_box |
| UP000028323 | 1443103 | <i>Snodgrassella</i>       | <i>alvi</i>             | 1571 | Adeno_knob                                                                  |
| UP000028521 | 1197477 | <i>Mangrovimonas</i>       | <i>yunxiaonensis</i>    | 2307 |                                                                             |
| UP000028602 | 1005995 | <i>Tatumella</i>           | <i>ptyseos</i>          | 3337 | Sushi_2                                                                     |
| UP000028624 | 1005999 | <i>Leminorella</i>         | <i>grimontii</i>        | 3756 |                                                                             |
| UP000028680 | 666509  | <i>Planktomarina</i>       | <i>temperata</i>        | 3024 |                                                                             |
| UP000028702 | 1333998 | <i>Tepidicaulis</i>        | <i>marinus</i>          | 3398 |                                                                             |
| UP000028720 | 1453500 | <i>Schleiferia</i>         | <i>thermophila</i>      | 2301 | RIIa                                                                        |
| UP000028725 | 394096  | <i>Hyalangium</i>          | <i>minutum</i>          | 8967 | HAUS2, Nodulin_late, LBP_BPI_CETP_C, CTU2, DUF2433, Telomere_Sde2_2         |
| UP000028824 | 1105367 | <i>Paenirhodobacter</i>    | <i>enshiensis</i>       | 2781 |                                                                             |
| UP000028826 | 195105  | <i>Haematobacter</i>       | <i>massiliensis</i>     | 3806 |                                                                             |
| UP000028933 | 1338011 | <i>Elizabethkingia</i>     | <i>anophelis</i>        | 4061 | DUF4574, ETC_C1_NDUFA5, Colipase-like                                       |
| UP000028945 | 1072685 | <i>Basilea</i>             | <i>psittacipulmonis</i> | 1452 |                                                                             |
| UP000028981 | 46914   | <i>Devosia</i>             | <i>riboflavina</i>      | 4273 | NiFe_hyd_3_EhaA                                                             |
| UP000029085 | 1121014 | <i>Arenimonas</i>          | <i>donghaensis</i>      | 2685 |                                                                             |

|             |         |                           |                            |       |                                                        |
|-------------|---------|---------------------------|----------------------------|-------|--------------------------------------------------------|
| UP000029273 | 160660  | <i>Acidihalobacter</i>    | <i>prosperus</i>           | 2685  | Transmemb_17                                           |
| UP000029516 | 158822  | <i>Cedecea</i>            | <i>neteri</i>              | 4399  | NADH-u_ox-rdase, LFY_SAM                               |
| UP000029541 | 1238    | <i>Piscirickettsia</i>    | <i>salmonis</i>            | 2947  | IPK                                                    |
| UP000029622 | 1156417 | <i>Caloranaerobacter</i>  | <i>azorensis</i>           | 2148  |                                                        |
| UP000029629 | 1401065 | <i>Oligella</i>           | <i>urethralis</i>          | 2118  | zf-ZPR1                                                |
| UP000029640 | 1265313 | <i>Pseudohalaea</i>       | <i>rubra</i>               | 2860  |                                                        |
| UP000029644 | 221126  | <i>Algibacter</i>         | <i>lectus</i>              | 4609  | ENTH, Xlink, Herpes_UL4                                |
| UP000029708 | 1543381 | <i>Oleigrimonas</i>       | <i>solis</i>               | 2676  |                                                        |
| UP000029736 | 1524460 | <i>Phaeodactylibacter</i> | <i>xiamenensis</i>         | 5064  | HeLo, cwf18, DUF1221                                   |
| UP000029737 | 414996  | <i>Actinopolyspora</i>    | <i>erythraea</i>           | 3972  | Leptin, P_C, Cwf_Cwc_15                                |
| UP000029738 | 1479485 | <i>Tolypothrix</i>        | <i>bouteillei</i>          | 7755  | RNA_bind, VMR2                                         |
| UP000029864 | 1001240 | <i>Cryobacterium</i>      | <i>roopkundense</i>        | 3249  | Prd1-P2                                                |
| UP000029986 | 1453496 | <i>Hafnia</i>             | <i>alvei</i>               | 4059  | 7tm_2                                                  |
| UP000029990 | 1385518 | <i>Knoellia</i>           | <i>flava</i>               | 3373  | DUF4904                                                |
| UP000029995 | 1398085 | <i>Inquilinus</i>         | <i>limosus</i>             | 6228  | DUF1948                                                |
| UP000030004 | 1461694 | <i>Pseudoceanicola</i>    | <i>atlanticus</i>          | 4202  |                                                        |
| UP000030147 | 1385514 | <i>Pontibacillus</i>      | <i>yanchengensis</i>       | 3964  | AIM5, DUF3821, Baculo_p47, RSN1_7TM, PH_BEACH, DUF1712 |
| UP000030170 | 1497020 | <i>Neosynechococcus</i>   | <i>sphagnicola</i>         | 2723  | CALM_bind, DUF1673                                     |
| UP000030184 | 504487  | <i>Jejuia</i>             | <i>pallidilutea</i>        | 3326  |                                                        |
| UP000030185 | 153721  | <i>Sporocytophaga</i>     | <i>myxococcoides</i>       | 5042  | Vac7, Defensin_big, Peptidase C33                      |
| UP000030300 | 2045    | <i>Nocardioides</i>       | <i>simplex</i>             | 5426  |                                                        |
| UP000030380 | 505317  | <i>Chelonobacter</i>      | <i>oris</i>                | 2284  | TPP1                                                   |
| UP000030826 | 370622  | <i>Aureimonas</i>         | <i>altamirensis</i>        | 3519  |                                                        |
| UP000030856 | 2340    | <i>Solemya</i>            | <i>velum</i>               | 2657  | Na_trans_assoc                                         |
| UP000030901 | 1267021 | <i>Frischella</i>         | <i>perrara</i>             | 2270  | Pox_RNA_Pol_22                                         |
| UP000030982 | 1338436 | <i>Sinomonas</i>          | <i>humi</i>                | 3444  |                                                        |
| UP000030988 | 1572751 | <i>Porphyrobacter</i>     | <i>mercurialis</i>         | 2758  |                                                        |
| UP000030993 | 82374   | <i>Anaerovibrio</i>       | <i>lipolyticus</i>         | 2437  | DCAF17                                                 |
| UP000031002 | 1348852 | <i>Mumia</i>              | <i>flava</i>               | 4037  |                                                        |
| UP000031189 | 1577792 | <i>Terrisporobacter</i>   | <i>othiniensis</i>         | 3449  | DUF357, KAR9                                           |
| UP000031275 | 510955  | <i>Chryseobacterium</i>   | <i>solincola</i>           | 2087  | PPI_Ypi1, DUF809                                       |
| UP000031386 | 33033   | <i>Parvimonas</i>         | <i>micra</i>               | 1418  | tRNA_synt_1c_R2, Subtilosin A, Fn bind                 |
| UP000031408 | 1349421 | <i>Flaviumibacter</i>     | <i>solisilvae</i>          | 4215  |                                                        |
| UP000031518 | 454194  | <i>Pyrinomonas</i>        | <i>methylaliphatogenes</i> | 3179  | PPTA                                                   |
| UP000031549 | 1304833 | <i>Hassallia</i>          | <i>byssoides</i>           | 10137 | DUF5373, Ndc80_HEC                                     |
| UP000031552 | 340071  | <i>Criblamydia</i>        | <i>sequanensis</i>         | 2418  | Dicistro_VP4, RasGAP, DUF3645, Mito_carr               |
| UP000031561 | 1574623 | <i>Lyngbya</i>            | <i>confervoides</i>        | 6060  | ATXN-1_C, ANAPC2, DUF4782                              |
| UP000031599 | 215803  | <i>Enhygromyxa</i>        | <i>salina</i>              | 8157  | DUF2981, Kp4, MDM31 MDM32                              |



|             |         |                            |                           |      |                                                  |
|-------------|---------|----------------------------|---------------------------|------|--------------------------------------------------|
| UP000031623 | 40754   | <i>Thioploca</i>           | <i>ingrica</i>            | 3951 | Peptidase_C71, Geminin, CLAMP, FAM92, MRG, MAP   |
| UP000031631 | 1076588 | <i>Thiolapillus</i>        | <i>brandeum</i>           | 2824 | Baculo_Y142                                      |
| UP000031637 | 1223802 | <i>Sulfuritalea</i>        | <i>hydrogenivorans</i>    | 3578 | Ribosomal_L19e                                   |
| UP000031643 | 1384459 | <i>Methyloceanibacter</i>  | <i>caenitepidi</i>        | 3341 | Dimer_Tnp_hAT                                    |
| UP000031675 | 183763  | <i>Streptomonospora</i>    | <i>alba</i>               | 4307 | Adeno_PIX, INT SG DDX CT C                       |
| UP000031938 | 889306  | <i>Jeotgalibacillus</i>    | <i>solii</i>              | 3938 | SpoIISB_antitox, DUF4780, Ku PK bind,            |
| UP000031959 | 1233231 | <i>Scytonema</i>           | <i>tolypothrichoides</i>  | 7078 | DUF5494, DUF5355, DUF4603, DUF5424               |
| UP000031980 | 1547597 | <i>Sanguibacteroides</i>   | <i>justesenii</i>         | 2587 | Topoisom_I_N, TMEM72, Receptor_2B4, Casc1_N      |
| UP000032120 | 55969   | <i>Leucobacter</i>         | <i>komagatae</i>          | 2703 | Stb3, eIF-5a                                     |
| UP000032229 | 1454006 | <i>Siansivirga</i>         | <i>zeaxanthinifaciens</i> | 2744 | AcMNPV_Ac109, hGDE central                       |
| UP000032232 | 935700  | <i>Jannaschia</i>          | <i>aquimarina</i>         | 4049 |                                                  |
| UP000032233 | 1429043 | <i>Dethiosulfatarculus</i> | <i>sandiegensis</i>       | 5395 |                                                  |
| UP000032266 | 1445510 | <i>Gynuella</i>            | <i>sunshinyii</i>         | 5913 |                                                  |
| UP000032336 | 1121877 | <i>Ferrimicrobium</i>      | <i>acidiphilum</i>        | 2974 |                                                  |
| UP000032360 | 1280514 | <i>Acidithrix</i>          | <i>ferrooxidans</i>       | 3548 |                                                  |
| UP000032361 | 1382798 | <i>Tamlana</i>             | <i>nanhaiensis</i>        | 3029 | Utp11, Ribosomal_L27e, AAA_7, V1R, SOP4          |
| UP000032368 | 1594576 | <i>Mastigocladus</i>       | <i>laminosus</i>          | 5930 | PTPRCAP, PAT1                                    |
| UP000032414 | 451     | <i>Tatlockia</i>           | <i>micdadei</i>           | 2989 | CIMR, DNA_repr_REX1B, DUF4042, MMS19_N, Caleosin |
| UP000032417 | 1562970 | <i>Fermentimonas</i>       | <i>caenicola</i>          | 2391 | DUF1759, DUF1959                                 |
| UP000032438 | 80854   | <i>Moritella</i>           | <i>viscosa</i>            | 4219 | CNF1                                             |
| UP000032452 | 1618023 | <i>Chroococcales</i>       | <i>cyanobacterium</i>     | 4366 | DUF863, KIX_2                                    |
| UP000032503 | 110935  | <i>Agreia</i>              | <i>bicolorata</i>         | 3109 |                                                  |
| UP000032515 | 1076    | <i>Rhodopseudomonas</i>    | <i>palustris</i>          | 5580 | DUF3222, DUF5419                                 |
| UP000032530 | 575     | <i>Raoultella</i>          | <i>planticola</i>         | 2923 | zf-DNA_Pol                                       |
| UP000032568 | 485447  | <i>Thalassomonas</i>       | <i>actiniarum</i>         | 5460 | fn2, DUF2099, ELYS-bb, Med15_fungi               |
| UP000032611 | 1486262 | <i>Martellella</i>         | <i>endophytica</i>        | 4020 | PapJ, ISN1                                       |
| UP000032668 | 1120923 | <i>Acidocella</i>          | <i>aminolytica</i>        | 3751 | AflR                                             |
| UP000032679 | 1231623 | <i>Tanticharoenia</i>      | <i>sakaeratensis</i>      | 3154 |                                                  |
| UP000032680 | 1231350 | <i>Acidisphaera</i>        | <i>rubrifaciens</i>       | 2788 |                                                  |
| UP000032749 | 698738  | <i>Oleispira</i>           | <i>antarctica</i>         | 3895 |                                                  |
| UP000032809 | 1006576 | <i>Defluviitoga</i>        | <i>tunisiensis</i>        | 1811 | Drf_GBD, UPF0113, DUF2683, DUF647, DUF4500       |
| UP000032900 | 1236989 | <i>Geofilum</i>            | <i>rubicundum</i>         | 4411 | OSR1_C, L51_S25_CI-B8                            |
| UP000033070 | 1188319 | <i>Ferriphaseelus</i>      | <i>amnicola</i>           | 2638 | DUF5449, Filo_VP35                               |
| UP000033103 | 187101  | <i>Sneathia</i>            | <i>amni</i>               | 1182 | FragX_IP                                         |
| UP000033109 | 400092  | <i>Pontibacter</i>         | <i>korensis</i>           | 4103 | SEA, DUF5418, DUF5045, Vps52, PAR1               |
| UP000033220 | 1150469 | <i>Pararhodospirillum</i>  | <i>photometricum</i>      | 3275 | Herpes_LMP2, TFIIB                               |
| UP000033393 | 68170   | <i>Lechevalieria</i>       | <i>aerocolonigenes</i>    | 8237 | NTR, PMD, zf-RING_11                             |

|             |         |                           |                          |       |                                                      |                          |
|-------------|---------|---------------------------|--------------------------|-------|------------------------------------------------------|--------------------------|
| UP000033607 | 1637645 | <i>Limnoraphis</i>        | <i>robusta</i>           | 5035  | Gyro_capsid, Ima1_N                                  | DUF2678,                 |
| UP000033614 | 728     | <i>Avibacterium</i>       | <i>paragallinarum</i>    | 2171  |                                                      |                          |
| UP000033651 | 345309  | <i>Luteibacter</i>        | <i>yeojuensis</i>        | 3844  |                                                      |                          |
| UP000033764 | 332411  | <i>Aquitalea</i>          | <i>magnusonii</i>        | 4103  |                                                      |                          |
| UP000033774 | 552518  | <i>Elstera</i>            | <i>litoralis</i>         | 3298  | Dsh_C                                                |                          |
| UP000034029 | 407035  | <i>Salinicoccus</i>       | <i>halodurans</i>        | 2634  | Pam17                                                |                          |
| UP000034071 | 914150  | <i>Kangiella</i>          | <i>geojedonensis</i>     | 2207  | 7TM_GPCR_Srab, PUL                                   |                          |
| UP000034076 | 270498  | <i>Catabacter</i>         | <i>hongkongensis</i>     | 3148  |                                                      |                          |
| UP000034392 | 1267766 | <i>Atererythrobacter</i>  | <i>atlanticus</i>        | 3254  |                                                      |                          |
| UP000034491 | 1549748 | <i>Kiloniella</i>         | <i>litopenaei</i>        | 3735  |                                                      |                          |
| UP000034681 | 317619  | <i>Prochlorothrix</i>     | <i>hollandica</i>        | 3617  | Tim29, SL4P                                          |                          |
| UP000034883 | 927083  | <i>Sandaracinus</i>       | <i>amyolyticus</i>       | 8941  | DUF4735, Antistatin                                  | DYW_deaminase,           |
| UP000035032 | 59505   | <i>Actinotignum</i>       | <i>schaalii</i>          | 1443  |                                                      |                          |
| UP000035036 | 483547  | <i>Geoalkalibacter</i>    | <i>subterraneus</i>      | 2987  | Tnp_zf-ribbon_2                                      |                          |
| UP000035062 | 1195246 | <i>Alishewanella</i>      | <i>agri</i>              | 3152  | CSTF2_hinge                                          |                          |
| UP000035100 | 1123501 | <i>Wenxinia</i>           | <i>marina</i>            | 4030  | DUF2464                                              |                          |
| UP000035170 | 34073   | <i>Variovorax</i>         | <i>paradoxus</i>         | 6788  | NB, DUF1860                                          |                          |
| UP000035265 | 264251  | <i>Cellulosimicrobium</i> | <i>funkei</i>            | 3980  |                                                      |                          |
| UP000035287 | 1348774 | <i>Croceicoccus</i>       | <i>naphthovorans</i>     | 3411  | DUF1296                                              |                          |
| UP000035337 | 1408281 | <i>Endomicrobium</i>      | <i>proavitum</i>         | 1336  | DUF2122                                              |                          |
| UP000035352 | 413882  | <i>Polyangium</i>         | <i>brachysporum</i>      | 5541  | Pex26                                                |                          |
| UP000035579 | 48      | <i>Archangium</i>         | <i>gephyra</i>           | 10110 | Myb_DNA-bind_3, Extensin_2, Laminin_EGF, Mucin2_WxxW | DZF,                     |
| UP000035996 | 157733  | <i>Anaerobacillus</i>     | <i>macyae</i>            | 3973  | MIF4G_like_2                                         |                          |
| UP000036352 | 988812  | <i>Marinovum</i>          | <i>algicola</i>          | 4976  |                                                      |                          |
| UP000036700 | 445709  | <i>Pandoraea</i>          | <i>thiooxydans</i>       | 3963  | Erythrovirus_X                                       |                          |
| UP000036771 | 1629334 | <i>Caedibacter</i>        | <i>varicaedens</i>       | 1663  |                                                      |                          |
| UP000036780 | 1473    | <i>Virgibacillus</i>      | <i>pantotheticus</i>     | 3923  | DUF2258, SMP_LBD, DWNN, MADF DNA_bdg                 | Herpes_UL92, Arrestin_C, |
| UP000037269 | 47500   | <i>Aneurinibacillus</i>   | <i>migulanus</i>         | 5649  | RNA_pol_Rpb4, DUF3599, LSM14, CHDNT, GLYCAM-1        | zf-RING_9,               |
| UP000037784 | 872965  | <i>Ardenticatena</i>      | <i>maritima</i>          | 3144  |                                                      |                          |
| UP000037939 | 857265  | <i>Amantichitinum</i>     | <i>ursilacus</i>         | 4368  |                                                      |                          |
| UP000037969 | 2026    | <i>Thermoactinomyces</i>  | <i>vulgaris</i>          | 3820  | zf-PARP, GRA6, NDUF_B12                              |                          |
| UP000038011 | 1514904 | <i>Ahrensia</i>           | <i>marina</i>            | 3161  |                                                      |                          |
| UP000046155 | 499207  | <i>Syntrophaceticus</i>   | <i>schinkii</i>          | 3167  |                                                      |                          |
| UP000048984 | 665126  | <i>Prosthecomicrobium</i> | <i>hirschii</i>          | 5501  | Reovirus_L2                                          |                          |
| UP000050280 | 1300341 | <i>Croceitalea</i>        | <i>dokdonensis</i>       | 3682  |                                                      |                          |
| UP000050326 | 36849   | <i>Oxobacter</i>          | <i>pfennigii</i>         | 4273  | TRAP_alpha, DUF3824                                  | Innexin,                 |
| UP000050331 | 1472767 | <i>Lentibacillus</i>      | <i>amyloliquefaciens</i> | 3553  | DUF2951                                              |                          |

|             |         |                         |                       |      |              |
|-------------|---------|-------------------------|-----------------------|------|--------------|
| UP000050417 | 1134406 | <i>Ornatilinea</i>      | <i>apprima</i>        | 3344 | NMT, DnaJ-X  |
| UP000050430 | 229920  | <i>Leptolinea</i>       | <i>tardivitalis</i>   | 2936 |              |
| UP000050465 | 1666911 | <i>Phormidesmis</i>     | <i>priestleyi</i>     | 4851 | DBB, ArgoMid |
| UP000050471 | 154981  | <i>Aliiroseovarius</i>  | <i>crassostreae</i>   | 3465 |              |
| UP000050501 | 229921  | <i>Levilinea</i>        | <i>saccharolytica</i> | 3080 |              |
| UP000050509 | 186479  | <i>Kouleothrix</i>      | <i>aurantiaca</i>     | 7836 | Desmo_N      |
| UP000050514 | 360411  | <i>Bellilinea</i>       | <i>caldifistulae</i>  | 2990 | DUF3827      |
| UP000050544 | 869279  | <i>Thermanaerothrix</i> | <i>daxensis</i>       | 2394 | NeA_P2       |

**Supplementary Table 4** Domain uniqueness and duplication rates were analysed in terms of bacterial lifestyle. Proteomes of 5 free-living, 7 parasitic, 3 sit-and-wait, and 2 vector-borne bacterial species were dissected in terms of domain distributions. All bacteria were classified according to a previous study [1]. It can be observed that free-living and sit-and-wait bacteria have higher domain duplication rates in their proteomes while parasitic and vector-borne pathogens tend to have less duplicated domains.

| Proteome ID | Taxonomy ID | Genus                 | Species                | Lifestyle    | Proteome Size | Domain0 | Domain1 | Domain2 | Domain3 | All Domains | Non-redundant Domains | Duplicated Domains | Duplication Rates |
|-------------|-------------|-----------------------|------------------------|--------------|---------------|---------|---------|---------|---------|-------------|-----------------------|--------------------|-------------------|
| UP000000532 | 300852      | <i>Thermus</i>        | <i>thermophilus</i>    | Free-living  | 2227          | 303     | 950     | 420     | 554     | 4374        | 1837                  | 768                | 41.81%            |
| UP000000609 | 272624      | <i>Legionella</i>     | <i>pneumophila</i>     |              | 2930          | 584     | 1106    | 536     | 704     | 5481        | 2160                  | 961                | 44.49%            |
| UP000002207 | 240015      | <i>Acidobacterium</i> | <i>capsulatum</i>      |              | 3363          | 678     | 1164    | 606     | 915     | 6591        | 2234                  | 1011               | 45.26%            |
| UP000002208 | 546414      | <i>Deinococcus</i>    | <i>deserti</i>         |              | 3459          | 651     | 1315    | 624     | 869     | 6660        | 2115                  | 988                | 46.71%            |
| UP000002008 | 324602      | <i>Chloroflexus</i>   | <i>aurantiacus</i>     |              | 3850          | 536     | 1415    | 729     | 1170    | 8920        | 2293                  | 1167               | 50.89%            |
| UP000002741 | 573234      | <i>Hodgkinia</i>      | <i>cicadicola</i>      | Parasitic    | 169           | 45      | 87      | 22      | 15      | 204         | 182                   | 16                 | 8.79%             |
| UP000000423 | 273119      | <i>Ureaplasma</i>     | <i>parvum</i>          |              | 611           | 159     | 227     | 98      | 127     | 999         | 626                   | 149                | 23.80%            |
| UP000000528 | 272635      | <i>Mycoplasma</i>     | <i>pulmonis</i>        |              | 778           | 219     | 269     | 135     | 155     | 1247        | 704                   | 187                | 26.56%            |
| UP000002480 | 272947      | <i>Rickettsia</i>     | <i>proWazekii</i>      |              | 834           | 61      | 388     | 155     | 230     | 1752        | 1072                  | 301                | 28.08%            |
| UP000000429 | 85962       | <i>Helicobacter</i>   | <i>pylori</i>          |              | 1553          | 310     | 663     | 281     | 299     | 2568        | 1379                  | 444                | 32.20%            |
| UP000002671 | 227377      | <i>Coxiella</i>       | <i>burnetii</i>        |              | 1815          | 456     | 639     | 315     | 402     | 3148        | 1577                  | 565                | 35.83%            |
| UP000002719 | 359391      | <i>Brucella</i>       | <i>abortus</i>         |              | 3022          | 489     | 1210    | 574     | 750     | 5671        | 2158                  | 867                | 40.18%            |
| UP000000579 | 71421       | <i>Haemophilus</i>    | <i>influenzae</i>      | Sit-and-wait | 1707          | 96      | 792     | 362     | 457     | 3596        | 1839                  | 650                | 35.35%            |
| UP000000815 | 632         | <i>Yersinia</i>       | <i>pestis</i>          |              | 3909          | 417     | 1735    | 803     | 945     | 7565        | 2817                  | 1175               | 41.71%            |
| UP000000605 | 272560      | <i>Burkholderia</i>   | <i>pseudomallei</i>    |              | 5717          | 669     | 2349    | 1204    | 1495    | 11518       | 2948                  | 1452               | 49.25%            |
| UP000001943 | 212042      | <i>Anaplasma</i>      | <i>phagocytophilum</i> | Vector-borne | 1330          | 530     | 459     | 130     | 211     | 1664        | 991                   | 292                | 29.47%            |
| UP000001174 | 177416      | <i>Francisella</i>    | <i>tularensis</i>      |              | 1528          | 231     | 605     | 333     | 359     | 2949        | 1545                  | 531                | 34.37%            |

## References

- [1] Wang L, Liu Z, Dai S, Yan J, Wise MJ. The Sit-and-Wait Hypothesis in Bacterial Pathogens: A Theoretical Study of Durability and Virulence. *Frontiers in Microbiology*. 2017; 8.
